# Supplementary material for: Clustering of Tissue-Specific Sub-TADs Accompanies the Regulation of HoxA Genes in Developing Limbs
Source: PLoS Genet. 2013 Dec 26;9(12):e1004018. doi: 10.1371/journal.pgen.1004018 (PMC3873244; doi:10.1371/journal.pgen.1004018)
Supplement: Table S4 — Mouse 5C primers for HoxA and USP22 regions used in the altered “FR” design. This 5C primer set was used in Figures 5, S4, and S5. (XLSX) [file pgen.1004018.s012.xlsx]

## Sheet: Sheet1
Table S4. Mouse 5C primers for HoxA and USP22 regions used in the altered "FR" design
Fragment	Type	Size	Genomic sequence (5' to 3')	EcoRI position Start	EcoRI position End
HoxA (chr.6; mm9)
64	Forward	27	ATGGATAAACGACGATCAAAATTAGAA	52099907	52102168
65	Reverse	26	TTCCTTGTGCCTGGATGACCAGAGCT	52102168	52102347
66	Forward	28	ATGCTAAATTAGACTCAAACGCCTAGAA	52102347	52102627
67	Reverse	26	TTCTGGAGCCTTGGTTGGAAGTTAAC	52102627	52106574
68	Forward	27	GGACCGCGCTACTATTAAACTATTGAA	52106574	52114833
69	Reverse	32	TTCAGCATCTGCCATTCTGTGGATTTATTTCC	52114833	52118412
70	Forward	27	CGAAGCATCCTCAGTGGAGACCTGGAA	52118412	52118617
71	Reverse	23	TTCAGGAAGCGCCCAAGCTCACC	52118617	52119970
72	Forward	29	GGACACTGTTGACCAGCGAATGCATAGAA	52119970	52120434
73	Reverse	29	TTCTGACCTCTAGATAGAACCATCTTTAG	52120434	52121814
74	Forward	28	GGCAGCGTCCACAAACTTAAAATATGAA	52121814	52125015
75	Reverse	33	TTCTGTAGCTGTAGTCCTTAGCAAGCAGAGACA	52125015	52128991
76	Forward	27	TGGCCTCCCCTTTACAGACAAATTGAA	52128991	52130453
77	Reverse	32	TTCATCTGTGACAGGCATAGTGGAGTACTTAA	52130453	52137259
78	Forward	29	GATTAGTCTGGCTTCCTTCCAACAGTGAA	52137259	52138976
79	Reverse	26	TTCTTGCCAAGCTTGACCCACTGTGG	52138976	52139489
81	Forward	27	CTTGGGTTTTAATGGTCCTCTGATGAA	52140604	52146677
82	Reverse	29	TTCAAATGGATCTAGCTCCTAACTTTTGA	52146677	52147259
85	Forward	25	GGGAAAAGCCTTACCCGCACAGGAA	52156546	52158195
86	Reverse	28	TTCTGTGTTGGAGGAGAGAACCGAGTTA	52158195	52162386
87	Forward	24	GGGTACTGCAGCAGGGACCCTGAA	52162386	52163901
88	Reverse	25	TTCCAAATTCAACTTTCCTCTAAAG	52163901	52164024
90	Reverse	30	TTCTGCCCTAAGGCTTCTCACAGATGTTCT	52165964	52166258
91	Forward	28	GACAGTTGTAAACTCATTAAGAGCCGAA	52166258	52172097
92	Reverse	27	TTCAATTTGAACTCAGGTTGTTTATGG	52172097	52173708
93	Forward	25	GGGCGACACAGAACCTAGGCAGGAA	52173708	52179119
95	Reverse	25	TTCACCCCCCTCATACAGCCCGAGT	52179845	52182847
97	Forward	28	ACAGGGGAAGCATCTACACGTTATGGAA	52188276	52189337
98	Reverse	29	TTCTAAGGGTTGTGAATCAACAGAATGAA	52189337	52193142
99	Forward	25	CCCGCTGCTGGCAGACATAGAGGAA	52193142	52202193
100	Reverse	27	TTCACTTTATGCCCCTTCTCCTGGAAG	52202193	52208129
101	Forward	25	GGAGGCTTTGGGCTGCATCTTTGAA	52208129	52213464
102	Reverse	30	TTCGGTCCCTCTGCATCCAACTCATATTAG	52213464	52215697
103	Forward	28	GTAAGGACACTCCCCATCTGGCTGTGAA	52215697	52216109
104	Reverse	27	TTCAAACTTCATTGTTTCTCATTTTCC	52216109	52218312
105	Forward	32	GAGCTTCTCTATAGAGAGCCCAAGCGTGTGAA	52218312	52218603
106	Reverse	26	TTCTGCGTGACCATTGGACATCTTCC	52218603	52232379
107	Forward	31	GAGCCTGAATTGCTCTTGCAAAGGAATTGAA	52232379	52239458
108	Reverse	27	TTCGTGGAGCGTTAACTTGTCAAGGTA	52239458	52240301
109	Forward	32	CCTGTGACTGGATCTCCTTTGCATACTGTGAA	52240301	52240552
110	Reverse	27	TTCTCCATCTGCCAAGAAAGGCTGGG	52240552	52241180
113	Forward	24	AGGTGTTAAATTTTTCACCTGGAA	52244253	52247080
114	Reverse	31	TTCCTATCTTCACCTAAGCACATAGCTTTCA	52247080	52247369
115	Forward	29	TGAACTGTAGCTCCTCCCAGGAGGGAGAA	52247369	52248708
117	Forward	27	TCTTAAGGATGAGTTTGGGACCAAGAA	52249859	52251201
118	Reverse	27	TTCTCTGAACTTCAAACGCTGTGGGTT	52251201	52260690
119	Forward	26	CTTCTCCCAAACACCAAGTCCCAGAA	52260690	52262318
120	Reverse	28	TTCTGCCACAAACGGCGTGTTCTAATGA	52262318	52262666
121	Forward	23	CGCTCCCTTTTCTGTGTGCGGAA	52262666	52263361
122	Reverse	28	TTCTTGAGGTTAATGTATTGTAGCTTGT	52263361	52265393
123	Forward	26	GGGATGGTCCTACCTGGAGGATGGAA	52265393	52268866
124	Reverse	28	TTCCAGCAGATCCCAAAGGTGTTCCTTA	52268866	52271073
125	Forward	26	GGTTCTGCAGGGGCAAGCATATCGAA	52271073	52271271
126	Reverse	24	TTCTCCCCTCTTCCGGAACGGTTG	52271271	52272007
127	Forward	31	AGCCAAACTCCTAGATCTGCTCAGTAGAGAA	52272007	52273662
129	Reverse	31	TTCTTAGAGCAGAATAGCAAAGAATCCTGGC	52273751	52279265
130	Forward	24	CCCCAGGACCTTTCTGGGGAAGAA	52279265	52282632
133	Reverse	31	TTCCAAAGCTACATCATGCTCCTTTAGAGAA	52301128	52303118
137	Forward	26	TCTTTGAGCAAAAACAAAAGGTAGAA	52313112	52316057
139	Reverse	27	TTCATTTAAATTGTGCCAAACCCCAGA	52316168	52332467
142	Reverse	27	TTCATCCTTTTTGACAAGGTGAATAGG	52334697	52337309
143	Forward	30	TTCATGAAATCTACCCAGAGAACTTCAGAA	52337309	52345436
146	Reverse	33	TTCATAGAGATAGCATAAGAAATATAAATGCAA	52349868	52361783
147	Forward	29	ACGAGCACAGTGGATTCTGGGAAGTAGAA	52361783	52364459
148	Reverse	24	TTCCTTATTTTCTAAATTTCCTCC	52364459	52367178
149	Forward	28	CAAATGACTTCACATTTATTTCAAAGAA	52367178	52369809
150	Reverse	30	TTCACTGGCTACTGTGATCACCATTCCACC	52369809	52372052
151	Forward	30	TATGGCCAAATCAAATGATTTGACTTGGAA	52372052	52381044
153	Reverse	28	TTCCCAGTCAGTGGTTAGGAGACACGTG	52381133	52383492
154	Forward	28	TTTCTGGGCGGCACTGGTTGTTCTAGAA	52383492	52387391
155	Reverse	27	TTCTGAGGAAGAGAAACCAAATGCCCT	52387391	52392264
156	Forward	26	TTGAAATAAGAGTTTTCCCATTTGAA	52392264	52401093
157	Reverse	29	TTCTTCCTCAATTAAGGTCCAGACATTCA	52401093	52402200
158	Forward	26	GGAACGGGAGGAGAAGAGCCTTGGAA	52402200	52407151
159	Reverse	27	TTCTCATTCTAATTTGAAACCAAAGTA	52407151	52410076
161	Reverse	31	TTCAAGGCTATCTTGATCTTGACTATTAAGA	52415131	52419678
163	Forward	30	TGGTGATTTATGCCCTTGCTACTTCCTGAA	52420006	52429375
165	Reverse	22	TTCAGGAGCCCTGAGGGCGGTC	52438705	52440652
167	Reverse	29	TTCCATAAGAGGTCCCTCTTAGATTGATA	52441759	52444151
168	Forward	31	TATTGATCTTATATCCTCTAAACTTGCTGAA	52444151	52448361
169	Reverse	24	TTCCTGAAGGGACAGCAGCAGCAG	52448361	52449991
171	Forward	28	AATGAAAGATCATTTTACTACTTCTGAA	52450036	52462044
173	Reverse	30	TTCAGTTGTCAGGCTGTGAGATGACCAGAC	52464987	52470467
174	Forward	28	CCATAAATTACTGAAGAGAAGACCTGAA	52470467	52478865
175	Reverse		TTCCAAGGATTTGAACATGTCTAGAAGAT	52478865	52483388
176	Forward	29	CAAAGATGGCAATACCTGACCATGCAGAA	52483388	52490414
177	Reverse	27	TTCAGAGCTTTCATAAAGTTTTTATAA	52490414	52493874
178	Forward	28	CATAGCTAGAAAAATACTATAAACAGAA	52493874	52497394
179	Reverse	26	TTCATTGTCCTTTTCCCTTACTCCCA	52497394	52497615
180	Forward	27	AGTAGAGGGGACAAATGTCATCGGGAA	52497615	52497933
181	Reverse	34	TTCATTCTGTTTGTATCAGAGAACATCTCAGCAA	52497933	52501912
182	Forward	31	AAACTAGTCACATGGTAGCATAGCACTTGAA	52501912	52506069
183	Reverse	30	TTCAAGTGACCCATCAAGGCCATATACTTA	52506069	52509766
185	Forward	30	CTTGGGAGGCTAAGATAGCCAAATCATGAA	52509879	52510899
187	Reverse	28	TTCAAACAAGGCTAATTAAAAGAGCTGC	52514325	52518961
189	Forward	25	GGCATCTTGTCTCCTCCCTGGGGAA	52520631	52522484
191	Reverse	27	TTCATAAGTAGAGAGTTTAAATGTAAA	52522985	52524187
194	Reverse	30	TTCATATTTAATCATTCAATGACAAGGTAA	52527037	52527403
195	Forward	31	GATAGTCACTAAAACATCACAATCGACTGAA	52527403	52527763
196	Reverse	30	TTCAAGGTATACATTATAAACATTGATTCA	52527763	52541897
197	Forward	26	AAGCAGTATTTATAGGTAAAATGGAA	52541897	52542057
198	Reverse	32	TTCCTGCTGGTGATAGATATCAACATAAGAAA	52542057	52542687
199	Forward	25	TTTACAAGTTTACTTGTTAGAAGAA	52542687	52542962
201	Forward	28	CAAACAATTTAAGTCAAGAGCTGGAGAA	52545386	52551985
202	Reverse	26	TTCAAGTGGAAAAACAACTATGAAAA	52551985	52562232
203	Forward	28	ACAGAGCCTGACGACATGACCAATGGAA	52562232	52568056
206	Reverse	25	TTCTGTACCACCATTTTTTTTAACA	52575680	52581530
208	Forward	31	GTCAGCACATATCTTTCACTGTAAGTGGGAA	52582510	52584015
210	Reverse	30	TTCTGTGGAGGGATTTGCCTCCATATTATG	52584025	52588283
211	Forward	27	TGAATTTACAACCTTTGGGTGAGAGAA	52588283	52590517
220	Reverse	29	TTCAGCAAATTTAGAATGAACATCTATTT	52626005	52627104
221	Forward	30	AATAGATGGGAGATTTGCTCTCTTTGAGAA	52627105	52628031
225	Reverse	30	TTCTTCTCACACAACTCAATTCCTGGACCA	52637837	52641317
226	Forward	27	TAAAAGAAAACAATTACAATGTGAGAA	52641318	52647573
228	Reverse	33	TTCAATGAATGATGATTTATTAGCACTCAACAC	52656263	52657321
229	Forward	28	TTGCTGCAAATCTAAGGTTTTTGTTGAA	52657322	52658513
231	Reverse	23	TTCACAGTTCCTTCTAACTCCTGGATGAA	52679072	52680393
235	Forward	29	TGAACCATATGGAACAGTGAAATGTAAGAA	52693850	52694645
237	Reverse	30	TTCTCAGCAAACCTGATTACCTGCCTAAGA	52699639	52701839
238	Forward	30	TATTTAGTTCTTCGAGTGTATTTCTGAGAA	52701840	52704692
239	Reverse	30	TTCAAGGCATGCCTGAGTTCTAATGAAAAC	52704693	52706024
240	Forward	30	GCCTTCTTTTGCACCAACTTCTATTCTGAA	52706025	52718534
241	Reverse	30	TTCCGCTGAGAACAATTAGCAGCCACG	52718535	52721479
243	Forward	27	GGCCTATGCACAGTGAAGGTGAGTGAA	52723090	52725748
247	Reverse	27	TTCTGATCCACAGACCATCTCATCAGAGCT	52737646	52741644
248	Forward	30	GACATGCCAAGTTGTATGGCAAATTCTGAA	52741675	52742100
249	Reverse	30	TTCTTGTTCCTAAGACCCCCATCTAATTAT	52742101	52748549
251	Forward	30	AGCTATGGACCTTGGTTTAGAAAGAGGGAA	52748770	52752905
253	Reverse	30	TTCTTACAACTCAGTATTAGAAACAGATGG	52753097	52754946
255	Forward	30	ATGTCCGGGGTACTTTGATAAACACTTGAA	52759240	52771163
256	Reverse	29	TTCCTAAGTAGGCCAAGTACTTCCCCTGC	52771164	52772646
257	Forward	30	TACTTACTGCTCAATCACTGATGGCAGGAA	52772647	52777261
258	Reverse	30	TTCCTCTGCTAAATCCTTCATTATGTCCTT	52777262	52778607
262	Reverse	26	TTCACTTACTGGCTCCATGCCCACAG	52793374	52801167
263	Forward	30	ATTGAAAACAACTGGTAAGACAATAAGGAA	52801169	52803285
264	Reverse	30	TTCAGATCTGAGGCCAGATTTCCTGGAAAG	52803286	52809464
265	Forward	30	CTGAGCCAAACACGGTCAACAAAACTTGAA	52809465	52817061
267	Reverse	23	TTCAGAGCGTTGGAGCCGAGGTG	52817090	52817285
268	Forward	30	TGAAAACGAGGCCAATTCACACTTCCTGAA	52817286	52820895
269	Reverse	30	TTCTGGGATCCTAATCTGGAAATTTGTGGG	52820896	52831247
270	Forward	30	TACAGTAAGTGCAGTGTACTCTTGTATGAA	52831248	52832456
272	Reverse	30	TTCCTTTGTAAGGTGATTCCACATCACAAA	52832471	52841533
273	Forward	30	GTCTGAAACTCACCAATTGAGGGTGAGGAA	52841534	52842038
274	Reverse	30	TTCAAAACATAGTTGGAGTATCAGAATATA	52842039	52843690
277	Forward	30	TTGGTGAGCTTTATATCTAAAAGTCAGGAA	52848364	52850692
278	Reverse	30	TTCGGTTTCTTTGACTCCACTAAGAAAGCC	52850693	52851731
280	Forward	30	TTTTTCCTAGTAAAAAGGTGCTTCCTGGAA	52858040	52858605
281	Reverse	30	TTCAGTTTAGGGATTGACCAGTCCTCTGAT	52858606	52865393
284	Reverse	30	TTCTAAGCCTATGATTGGCCTCTTTGTTTA	52871142	52873703
285	Forward	21	CAGGGGGGGAAGGCTGTGGAA	52873704	52878849
286	Reverse	30	TTCACAGTGCCCTTTGTACATTACAGAGAG	52878850	52881665
287	Forward	30	TTCTTAGCCAAAAACAGGTTCATCAAAGAA	52881666	52885980
288	Reverse	30	TTCTATCCTGAATGCCTCCCATGACTCCAG	52885981	52888326
289	Forward	30	GAAAGACACAAGACAGAATATACAGTGGAA	52888327	52890013
290	Reverse	30	TTCCTTTTTTACCCAACATACTCTTTTGAA	52890014	52897320
291	Forward	30	GCCTTACATTACATGACTAAATCCTGTGAA	52897321	52911313
292	Reverse	26	TTCAAGAGCGGTGCCCTGTGATAGAC	52911314	52914397
293	Forward	24	GCCTCCCTGGAAAGACAGACGGAA	52914398	52918137
295	Reverse	20	TTCCCCCTGCCAACAGGTGG	52918252	52919700
296	Forward	30	GGGTTATATGTATTATGCTGTGTCCTGGAA	52919701	52924303
297	Reverse	30	TTCTTCAGGGGCATGTCCTAATGAGATTAA	52924304	52933041
298	Forward	30	AGGAGATGTATGTTTCCCAGGAAGATAGAA	52933042	52942459
302	Forward	30	ATCCTGGAAAAATTCTTATCAACGACAGAA	52952345	52960689
303	Reverse	30	TTCAGACAGTTTGAATGCAAGCAATGATAG	52960690	52967527
304	Forward	26	GCACTCACCACAACCTGAGAGCTGAA	52967528	52968961
307	Reverse	30	TTCTATAATTTAGCTGTTATTCTTTTAAAT	52975108	52979968
308	Forward	30	GGACTTGATAGATAAAAGGTAGCCATGGAA	52979969	52985775
311	Reverse	30	TTCAGTGAGTGTTAGCTGATGAAGCCTTCA	52990950	53001211
316	Reverse	30	TTCTACCTCCTGCTCTTTAGACCCTTGTCT	53013811	53020160
317	Forward	30	AGATAAGAGAGTGGCCATGAACTACACGAA	53020161	53021219
319	Reverse	30	TTCCCTTAAAGTCTTGCTTCTTTATAAACC	53025253	53026089
322	Forward	29	TATCAGGCTCAGACAGCTTTCATCCGGAA	53026446	53031824
323	Reverse	30	TTCCTCAGTACCGATTTGTCTTGATGCTTA	53031825	53033187
324	Forward	30	TTCTTTATCTTGTCTCTCAAGAGTTTGGAA	53033188	53035208
325	Reverse	30	TTCAGAACCGGTTGGAGCCTTAGATTAGAT	53035209	53036923
327	Forward	30	CTTTGAAATTCCATGAGACTTGAATCTGAA	53039978	53044657
USP22 (chr.11; mm9)
1	Forward	29	ACAGCTCAATGTGTCTGAGGTTGCCAGAA	60911852	60919138
2	Reverse	32	TTCTGACCTCTATGACTGGTCCTGGCACATAA	60919139	60919280
4	Forward	27	CAGAGCAGCTGGAGGGCCAGTAGAGAA	60920895	60923555
5	Reverse	24	TTCCTCAAACCCCCACAGCGTGTC	60923556	60923907
6	Forward	33	AATCTGACTTCAGCAAATGTGAGACAGCAGGAA	60923908	60927156
7	Reverse	28	TTCTTGCGCCTTTTAAAAACTGGATGCA	60927157	60942592
8	Forward	31	TTAAGGACTGCTCTTTGTGAGCTTATGAGAA	60942593	60945693
9	Reverse	28	TTCTGTGGGACAGAAAAAAAAATGCTGC	60945694	60954764
11	Forward	32	CACGCTCTCAGAGGGGAGAGAATCATCTAGAA	60961593	60967318
12	Reverse	28	TTCCCATTCCCATGCATGTGATATGGAT	60967319	60975326
14	Forward	28	TACGAGCTTTCCCAAAGTCTTCATAGAA	60981095	60982565
15	Reverse	30	TTCATATTCAAACTTAGCAGTATTGGTAGA	60982566	60985332
16	Forward	26	AAAGTAAAATCATAATTAATCAGGAA	60985333	60991690
18	Reverse	31	TTCTGCAGTGTGGTATGTAAGCACTTTCCTG	60996930	60997488
19	Forward	30	TAGGCCAAAAGTCACAGTGTGTCTTCTGAA	60997489	61007620
20	Reverse	30	TTCACAGAGGTATGGCCAGATTAGAGGTTC	61007621	61011596
21	Forward	29	AGCTCTTTCAGGGGGACATTGAGATGGAA	61011597	61014606
22	Reverse	29	TTCAAATACCCACCAAAACCACATGATGA	61014607	61014925
