# Supplementary material for: Clustering of Tissue-Specific Sub-TADs Accompanies the Regulation of HoxA Genes in Developing Limbs
Source: PLoS Genet. 2013 Dec 26;9(12):e1004018. doi: 10.1371/journal.pgen.1004018 (PMC3873244; doi:10.1371/journal.pgen.1004018)
Supplement: Table S10 — Mouse 5C results for the head replicate 1 anchored “cluster R” design. Biological replicate of the Head 5C dataset presented in matrix format. This data is shown in Figure S1 (bottom). Predicted EcoRI restriction fragments and corresponding genomic regions are named at the top of each column and on the left of each row. Intersecting rows and columns identify the pair-wise contacts corresponding to interaction frequencies. The 5C data was filtered as described in Materials and Methods, and is normalized based on the number of sequence reads per 1,000. (XLSX) [file pgen.1004018.s018.xlsx]

## Sheet: Table S10. Head rep. 1
Table S10. Mouse 5C results for the head replicate 1 anchored "cluster R" design
	HoxA_64|mm9|chr6:52099907-52102168	HoxA_65|mm9|chr6:52102168-52102347	HoxA_66|mm9|chr6:52102347-52102627	HoxA_67|mm9|chr6:52102627-52106574	HoxA_68|mm9|chr6:52106574-52114833	HoxA_69|mm9|chr6:52114833-52118412	HoxA_70|mm9|chr6:52118412-52118617	HoxA_71|mm9|chr6:52118617-52119970	HoxA_72|mm9|chr6:52119970-52120434	HoxA_73|mm9|chr6:52120434-52121814	HoxA_74|mm9|chr6:52121814-52125015	HoxA_75|mm9|chr6:52125015-52128991	HoxA_76|mm9|chr6:52128991-52130453	HoxA_77|mm9|chr6:52130453-52137259	HoxA_78|mm9|chr6:52137259-52138976	HoxA_79|mm9|chr6:52138976-52139489	HoxA_81|mm9|chr6:52140604-52146677	HoxA_82|mm9|chr6:52146677-52147259	HoxA_85|mm9|chr6:52156546-52158195	HoxA_86|mm9|chr6:52158195-52162386	HoxA_87|mm9|chr6:52162386-52163901	HoxA_91|mm9|chr6:52166258-52172097	HoxA_92|mm9|chr6:52172097-52173708	HoxA_93|mm9|chr6:52173708-52179119	HoxA_95|mm9|chr6:52179845-52182847	HoxA_97|mm9|chr6:52188276-52189337	HoxA_99|mm9|chr6:52193142-52202193	HoxA_100|mm9|chr6:52202193-52208129	HoxA_101|mm9|chr6:52208129-52213464	HoxA_102|mm9|chr6:52213464-52215697	HoxA_103|mm9|chr6:52215697-52216109	HoxA_104|mm9|chr6:52216109-52218312	HoxA_105|mm9|chr6:52218312-52218603	HoxA_106|mm9|chr6:52218603-52232379	HoxA_107|mm9|chr6:52232379-52239458	HoxA_108|mm9|chr6:52239458-52240301	HoxA_109|mm9|chr6:52240301-52240552	HoxA_113|mm9|chr6:52244253-52247080	HoxA_114|mm9|chr6:52247080-52247369	HoxA_115|mm9|chr6:52247369-52248708	HoxA_117|mm9|chr6:52249859-52251201	HoxA_118|mm9|chr6:52251201-52260690	HoxA_119|mm9|chr6:52260690-52262318	HoxA_120|mm9|chr6:52262318-52262666	HoxA_121|mm9|chr6:52262666-52263361	HoxA_122|mm9|chr6:52263361-52265393	HoxA_123|mm9|chr6:52265393-52268866	HoxA_124|mm9|chr6:52268866-52271073	HoxA_125|mm9|chr6:52271073-52271271
HoxA_64|mm9|chr6:52099907-52102168	0	0	0	0	0	0	0	0	0	0	0	0	0	0	0	0	0	0	0	0	0	0	0	0	0	0	0	0	0	0	0.737067	1.59923	0.346557	0.410796	0.35839	0.699875	0.304294	0.606897	0.236673	0.255269	0.503775	1.54344	0.965287	0.365152	0.557872	1.35073	0.711709	0.784401	0.42432
HoxA_65|mm9|chr6:52102168-52102347	0	0	0	0	0	0	0	0	0	0	0	0	0	0	0	0	0	0	0	0	0	0	0	0	0	0	0	0	0	0	0.26034	0.483489	0.256959	0.0371914	0.236673	0.191029	0.0912881	0.152147	0.145385	0.0574777	0	0.185957	0.45644	0.268793	0.155528	0.344866	0.248506	0.256959	0.263721
HoxA_66|mm9|chr6:52102347-52102627	0	0	0	0	0	0	0	0	0	0	2	0	0	0	0	0	0	0	0	0	0	0	0	0	0	0	0	0	0	0	0.383748	0.671136	0.123408	0.158909	0.16229	0.336413	0.0507156	0.0608587	0.0676208	0.12848	0.114955	0.407415	0.312746	0.343176	0.461512	0.22653	0.213006	0.503775	0.427702
HoxA_67|mm9|chr6:52102627-52106574	0	0	0	0	0	0	0	0	0	0	0	0	0	0	0	0	0	0	0	0	0	0	0	0	0	0	0	0	0	0	0.603516	1.23915	0.147075	0.265412	0.392201	0.334723	0.22653	0.0101431	0.61704	0.172433	0.0152147	1.19689	0.840188	0.170743	0.191029	0.569705	0.544347	0.338104	0.598444
HoxA_68|mm9|chr6:52106574-52114833	0	0	0	0	0	0	0	0	0	0	0	0	0	0	0	0	0	0	0	0	0	0	0	0	0	0	0	0	0	0	0.241744	0.767496	0.233292	0.218077	0.145385	0.0439535	0.167361	0.348247	0.304294	0.213006	0.138623	0.863856	0.728614	0.750591	0.468274	1.05657	0.400653	0.238363	0.081145
HoxA_69|mm9|chr6:52114833-52118412	0	0	0	0	0	0	0	0	0	0	0	0	0	0	0	0	0	0	0	0	0	0	0	0	0	0	0	0	0	0	0.824974	1.79195	0.297532	0.573086	0.694804	0.52068	0.507156	0.197791	0.791163	0.329651	0.360081	1.02276	1.13434	0.566324	0.791163	0.951763	0.267102	0.899357	0.417558
HoxA_70|mm9|chr6:52118412-52118617	0	0	0	0	0	0	0	0	0	0	0	0	0	0	0	0	0	0	0	0	0	0	0	0	0	0	0	0	0	0	0.12848	1.01938	0.0574777	0.125098	0.640707	0.241744	0.106503	0.0608587	0.197791	0	0.170743	0.459821	0.635635	0.103122	0.192719	0.246816	0.341485	0.420939	0.202862
HoxA_71|mm9|chr6:52118617-52119970	0	0	0	0	0	0	0	0	0	0	0	0	0	0	0	0	0	0	0	0	0	0	0	0	0	0	0	0	0	0	0.309365	1.32706	0.169052	0.280626	0.568015	0.143694	0.32458	0.0270483	0.143694	0.12848	0.218077	0.341485	0.753972	0.505465	0.368533	0.595063	0.368533	0.135242	0.495322
HoxA_72|mm9|chr6:52119970-52120434	0	0	0	0	0	0	0	0	0	0	0	0	0	0	0	0	0	0	0	0	0	0	0	0	0	0	0	0	0	0	0.373605	0.733686	0.131861	0.0895976	0.179195	0.0287388	0.0439535	0.189338	0.00676208	0.0524061	0.0169052	0.295841	0.378676	0.175814	0.229911	0.191029	0.263721	0.223149	0.126789
HoxA_73|mm9|chr6:52120434-52121814	0	0	0	0	0	0	0	0	0	0	0	0	0	0	0	0	0	0	0	0	0	0	0	0	0	0	0	0	0	0	0.802997	1.39975	0.331342	0.507156	0.48856	0.497013	0.537585	0.223149	0.207934	0.410796	0.0642398	0.990645	1.16646	0.61704	0.39051	1.49273	0.823283	0.397272	0.867237
HoxA_74|mm9|chr6:52121814-52125015	0	0	0	0	0	0	0	0	0	0	0	0	0	0	0	0	0	0	0	0	0	0	0	0	0	0	0	0	0	0	0.316127	0.84695	0.197791	0.633945	0.3567	0.234982	0.243435	0.29415	0.147075	0	0.0321199	0.826664	0.841879	0.398963	0.493632	0.982192	0.398963	0.371914	0.256959
HoxA_75|mm9|chr6:52125015-52128991	0	0	0	0	0	0	0	0	0	0	0	0	0	0	0	0	0	0	0	0	0	0	0	0	0	0	0	0	0	0	0.500394	1.16308	0.321199	0.480108	0.29246	0.432773	0.211315	0.471655	0.209624	0	0.0693113	0.431083	0.977121	0.671136	0.566324	1.24591	0.400653	0.243435	0.38882
HoxA_76|mm9|chr6:52128991-52130453	0	0	0	0	0	0	0	0	0	0	0	0	0	0	0	0	0	0	0	0	0	0	0	0	0	0	0	0	0	0	0.639017	0.84526	0.158909	0.29246	0.136932	0.322889	0.348247	0.3567	0.148766	0.275555	0.150456	0.655922	0.686351	0.240054	0.5528	0.87738	0.153837	0.363462	0.1961
HoxA_77|mm9|chr6:52130453-52137259	0	0	0	0	0	0	0	0	0	0	0	0	0	0	0	0	0	0	0	0	0	0	0	0	0	0	0	0	0	0	0.517299	0.995716	0.277245	0.213006	0.466583	0.327961	0	0.385439	0.165671	0.307675	0.327961	0.848641	0.437845	0.343176	0.628873	0.97543	0.478417	0.5528	0.155528
HoxA_78|mm9|chr6:52137259-52138976	0	0	0	0	0	0	0	0	0	0	0	0	0	0	0	0	0	0	0	0	0	0	0	0	0	0	0	0	0	0	0.464893	1.18505	0.229911	0.407415	0.791163	0.305984	0.125098	0.234982	0.290769	0.221458	0.155528	0.78102	1.77843	0.412487	0.343176	0.473346	0.628873	0.551109	0.600135
HoxA_79|mm9|chr6:52138976-52139489	0	0	0	0	0	0	0	0	0	0	0	0	0	0	0	0	0	0	0	0	0	0	0	0	0	0	0	0	0	0	0.453059	1.26282	0.084526	0.251887	0	0.556181	0.038882	0.0693113	0.0625492	0.0760734	0.116646	0.699875	0.45475	0.0777639	0.429392	0.593372	0.344866	0.385439	0.45475
HoxA_81|mm9|chr6:52140604-52146677	0	0	0	0	0	0	0	0	0	0	0	0	0	0	0	0	0	0	0	0	0	0	0	0	0	0	0	0	0	0	0.68128	1.93903	0.633945	1.31353	0.588301	0.708328	0.251887	0.429392	0.441226	0.383748	0.397272	1.56542	1.15293	0.777639	0.892595	0.923024	0.831736	0.904428	0.701566
HoxA_82|mm9|chr6:52146677-52147259	0	0	0	0	0	0	0	0	0	0	0	0	0	0	0	0	0	0	0	0	0	0	0	0	0	0	0	0	0	0	0.529133	1.46906	0.419249	0.224839	0.0980502	0.64916	0.300913	0.256959	0.0862165	0.343176	0.172433	1.20703	1.73616	0.305984	0.434464	1.26113	0.611968	0.578158	0.22822
HoxA_85|mm9|chr6:52156546-52158195	0	0	0	0	0	0	0	0	0	0	0	0	0	0	0	0	0	0	0	0	0	0	0	0	0	0	0	0	0	0	0.341485	1.4437	0.142004	0.289079	0.373605	0.152147	0.233292	0.233292	0.268793	0.187648	0.169052	0.652541	0.929786	0.419249	0.589991	0.669446	0.385439	0.0980502	0.759043
HoxA_86|mm9|chr6:52158195-52162386	0	0	0	0	0	0	0	0	0	0	0	0	0	0	0	0	0	0	0	0	0	0	0	0	0	0	0	0	0	0	0.32627	1.27465	0.351628	0.573086	0.777639	0.233292	0.158909	0.187648	0.243435	0.97543	0	0.733686	0.437845	0.202862	0.710018	0.791163	0.42432	0.305984	0.459821
HoxA_87|mm9|chr6:52162386-52163901	0	0	0	0	0	0	0	0	0	0	0	0	0	0	0	0	0	0	0	0	0	0	0	0	0	0	0	0	0	0	0.201172	1.54514	0.199481	0.280626	0.569705	0.224839	0.081145	0.12848	0.192719	0.0895976	0.0355009	0.285698	0.725233	0.502084	0.51899	0.493632	0.419249	0.218077	0.278936
HoxA_91|mm9|chr6:52166258-52172097	0	0	0	0	0	0	0	0	0	0	0	0	0	0	0	0	0	0	0	0	0	0	0	0	0	0	0	0	0	0	0.48856	1.52823	0.262031	0.51899	0.319508	0.571396	0.280626	0.309365	0.126789	0.0540966	0.0473346	0.889213	1.26113	0.557872	0.792854	0.872308	0.569705	0.513918	0.275555
HoxA_92|mm9|chr6:52172097-52173708	0	0	0	0	0	0	0	0	0	0	0	0	0	0	0	0	0	0	0	0	0	0	0	0	0	0	0	0	0	0	0.870618	1.8731	0.458131	0.557872	0.282317	0.524061	0.461512	0.375295	0.319508	0.192719	0.32458	1.0701	1.82069	0.368533	0.755662	2.03539	0.899357	0.554491	0.530823
HoxA_93|mm9|chr6:52173708-52179119	0	0	0	0	0	0	0	0	0	0	0	0	0	0	0	0	0	0	0	0	0	0	0	0	0	0	0	0	0	0	0.610278	1.56204	0.305984	0.432773	0.512228	0.302603	0.250197	0.243435	0.177505	0.280626	0.299222	0.833426	0.625492	0.574777	0.387129	0.603516	0.32627	0.331342	0.333032
HoxA_95|mm9|chr6:52179845-52182847	0	0	0	0	0	0	0	0	0	0	0	0	0	0	0	0	0	0	0	0	0	0	0	0	0	0	0	0	0	0	0.569705	2.02524	0.231601	0.42263	0.704947	0.375295	0.13017	0.218077	0.307675	0.22653	0.145385	0.551109	0.671136	0.355009	0.277245	0.603516	0.542657	0.491941	0.469965
HoxA_97|mm9|chr6:52188276-52189337	0	0	0	0	0	0	0	0	0	0	0	0	0	0	0	0	0	0	0	0	0	0	0	0	0	0	0	0	0	0	1.11405	3.02603	0.884142	0.497013	0.547728	1.00755	0.449678	0.0439535	0.475036	0.417558	0.158909	1.63473	1.50118	0.625492	1.05827	1.64826	1.00924	1.37946	0.764115
HoxA_99|mm9|chr6:52193142-52202193	0	0	0	0	0	0	0	0	0	0	0	0	0	0	0	0	0	0	0	0	0	0	0	0	0	0	0	0	0	0	0.662684	2.21796	0.376986	0.775949	0.569705	0.398963	0.277245	0.419249	0.19441	0.0963596	0.0862165	0.655922	0.557872	0.365152	0.400653	0.637326	0.48856	0.348247	0.32627
HoxA_100|mm9|chr6:52202193-52208129	0	0	0	0	0	0	0	0	0	0	0	0	0	0	0	0	0	0	0	0	0	0	0	0	0	0	0	0	0	0	1.69052	2.38532	0.757353	1.14617	0.387129	0.828355	0.0777639	1.1597	0.248506	0.491941	0.797925	1.97622	1.82407	1.02953	1.04136	2.20444	0.667755	0.865546	0.16398
HoxA_101|mm9|chr6:52208129-52213464	0	0	0	0	0	0	0	0	0	0	0	0	0	0	0	0	0	0	0	0	0	0	0	0	0	0	0	0	0	0	1.97284	4.00146	0.743829	0.836807	0.762424	0.775949	0.699875	0.376986	0.581539	0.515609	0.426011	1.67869	1.91705	0.880761	0.828355	1.89169	1.14786	1.32706	0.285698
HoxA_102|mm9|chr6:52213464-52215697	0	0	0	0	0	0	0	0	0	0	0	0	0	0	0	0	0	0	0	0	0	0	0	0	0	0	0	0	0	0	4.76558	8.01645	1.37439	1.10391	0.645779	0.718471	0.547728	0.923024	0.718471	0.207934	0.207934	1.58233	1.86464	0.493632	0.660993	1.89507	1.48597	0.919643	0.309365
HoxA_103|mm9|chr6:52215697-52216109	0.737067	0.26034	0.383748	0.603516	0.241744	0.824974	0.12848	0.309365	0.373605	0.802997	0.316127	0.500394	0.639017	0.517299	0.464893	0.453059	0.68128	0.529133	0.341485	0.32627	0.201172	0.48856	0.870618	0.610278	0.569705	1.11405	0.662684	1.69052	1.97284	4.76558	0	0	0	0	0	0	0	0	0	0	0	0	0	0	0	0	0	0	0
HoxA_104|mm9|chr6:52216109-52218312	1.59923	0.483489	0.671136	1.23915	0.767496	1.79195	1.01938	1.32706	0.733686	1.39975	0.84695	1.16308	0.84526	0.995716	1.18505	1.26282	1.93903	1.46906	1.4437	1.27465	1.54514	1.52823	1.8731	1.56204	2.02524	3.02603	2.21796	2.38532	4.00146	8.01645	0	0	0	0	0	0	0	0	0	0	0	0	0	0	0	0	0	0	0
HoxA_105|mm9|chr6:52218312-52218603	0.346557	0.256959	0.123408	0.147075	0.233292	0.297532	0.0574777	0.169052	0.131861	0.331342	0.197791	0.321199	0.158909	0.277245	0.229911	0.084526	0.633945	0.419249	0.142004	0.351628	0.199481	0.262031	0.458131	0.305984	0.231601	0.884142	0.376986	0.757353	0.743829	1.37439	0	0	0	0	0	0	0	0	0	0	0	0	0	0	0	0	0	0	0
HoxA_106|mm9|chr6:52218603-52232379	0.410796	0.0371914	0.158909	0.265412	0.218077	0.573086	0.125098	0.280626	0.0895976	0.507156	0.633945	0.480108	0.29246	0.213006	0.407415	0.251887	1.31353	0.224839	0.289079	0.573086	0.280626	0.51899	0.557872	0.432773	0.42263	0.497013	0.775949	1.14617	0.836807	1.10391	0	0	0	0	0	0	0	0	0	0	0	0	0	0	0	0	0	0	0
HoxA_107|mm9|chr6:52232379-52239458	0.35839	0.236673	0.16229	0.392201	0.145385	0.694804	0.640707	0.568015	0.179195	0.48856	0.3567	0.29246	0.136932	0.466583	0.791163	0	0.588301	0.0980502	0.373605	0.777639	0.569705	0.319508	0.282317	0.512228	0.704947	0.547728	0.569705	0.387129	0.762424	0.645779	0	0	0	0	0	0	0	0	0	0	0	0	0	0	0	0	0	0	0
HoxA_108|mm9|chr6:52239458-52240301	0.699875	0.191029	0.336413	0.334723	0.0439535	0.52068	0.241744	0.143694	0.0287388	0.497013	0.234982	0.432773	0.322889	0.327961	0.305984	0.556181	0.708328	0.64916	0.152147	0.233292	0.224839	0.571396	0.524061	0.302603	0.375295	1.00755	0.398963	0.828355	0.775949	0.718471	0	0	0	0	0	0	0	0	0	0	0	0	0	0	0	0	0	0	0
HoxA_109|mm9|chr6:52240301-52240552	0.304294	0.0912881	0.0507156	0.22653	0.167361	0.507156	0.106503	0.32458	0.0439535	0.537585	0.243435	0.211315	0.348247	0	0.125098	0.038882	0.251887	0.300913	0.233292	0.158909	0.081145	0.280626	0.461512	0.250197	0.13017	0.449678	0.277245	0.0777639	0.699875	0.547728	0	0	0	0	0	0	0	0	0	0	0	0	0	0	0	0	0	0	0
HoxA_113|mm9|chr6:52244253-52247080	0.606897	0.152147	0.0608587	0.0101431	0.348247	0.197791	0.0608587	0.0270483	0.189338	0.223149	0.29415	0.471655	0.3567	0.385439	0.234982	0.0693113	0.429392	0.256959	0.233292	0.187648	0.12848	0.309365	0.375295	0.243435	0.218077	0.0439535	0.419249	1.1597	0.376986	0.923024	0	0	0	0	0	0	0	0	0	0	0	0	0	0	0	0	0	0	0
HoxA_114|mm9|chr6:52247080-52247369	0.236673	0.145385	0.0676208	0.61704	0.304294	0.791163	0.197791	0.143694	0.00676208	0.207934	0.147075	0.209624	0.148766	0.165671	0.290769	0.0625492	0.441226	0.0862165	0.268793	0.243435	0.192719	0.126789	0.319508	0.177505	0.307675	0.475036	0.19441	0.248506	0.581539	0.718471	0	0	0	0	0	0	0	0	0	0	0	0	0	0	0	0	0	0	0
HoxA_115|mm9|chr6:52247369-52248708	0.255269	0.0574777	0.12848	0.172433	0.213006	0.329651	0	0.12848	0.0524061	0.410796	0	0	0.275555	0.307675	0.221458	0.0760734	0.383748	0.343176	0.187648	0.97543	0.0895976	0.0540966	0.192719	0.280626	0.22653	0.417558	0.0963596	0.491941	0.515609	0.207934	0	0	0	0	0	0	0	0	0	0	0	0	0	0	0	0	0	0	0
HoxA_117|mm9|chr6:52249859-52251201	0.503775	0	0.114955	0.0152147	0.138623	0.360081	0.170743	0.218077	0.0169052	0.0642398	0.0321199	0.0693113	0.150456	0.327961	0.155528	0.116646	0.397272	0.172433	0.169052	0	0.0355009	0.0473346	0.32458	0.299222	0.145385	0.158909	0.0862165	0.797925	0.426011	0.207934	0	0	0	0	0	0	0	0	0	0	0	0	0	0	0	0	0	0	0
HoxA_118|mm9|chr6:52251201-52260690	1.54344	0.185957	0.407415	1.19689	0.863856	1.02276	0.459821	0.341485	0.295841	0.990645	0.826664	0.431083	0.655922	0.848641	0.78102	0.699875	1.56542	1.20703	0.652541	0.733686	0.285698	0.889213	1.0701	0.833426	0.551109	1.63473	0.655922	1.97622	1.67869	1.58233	0	0	0	0	0	0	0	0	0	0	0	0	0	0	0	0	0	0	0
HoxA_119|mm9|chr6:52260690-52262318	0.965287	0.45644	0.312746	0.840188	0.728614	1.13434	0.635635	0.753972	0.378676	1.16646	0.841879	0.977121	0.686351	0.437845	1.77843	0.45475	1.15293	1.73616	0.929786	0.437845	0.725233	1.26113	1.82069	0.625492	0.671136	1.50118	0.557872	1.82407	1.91705	1.86464	0	0	0	0	0	0	0	0	0	0	0	0	0	0	0	0	0	0	0
HoxA_120|mm9|chr6:52262318-52262666	0.365152	0.268793	0.343176	0.170743	0.750591	0.566324	0.103122	0.505465	0.175814	0.61704	0.398963	0.671136	0.240054	0.343176	0.412487	0.0777639	0.777639	0.305984	0.419249	0.202862	0.502084	0.557872	0.368533	0.574777	0.355009	0.625492	0.365152	1.02953	0.880761	0.493632	0	0	0	0	0	0	0	0	0	0	0	0	0	0	0	0	0	0	0
HoxA_121|mm9|chr6:52262666-52263361	0.557872	0.155528	0.461512	0.191029	0.468274	0.791163	0.192719	0.368533	0.229911	0.39051	0.493632	0.566324	0.5528	0.628873	0.343176	0.429392	0.892595	0.434464	0.589991	0.710018	0.51899	0.792854	0.755662	0.387129	0.277245	1.05827	0.400653	1.04136	0.828355	0.660993	0	0	0	0	0	0	0	0	0	0	0	0	0	0	0	0	0	0	0
HoxA_122|mm9|chr6:52263361-52265393	1.35073	0.344866	0.22653	0.569705	1.05657	0.951763	0.246816	0.595063	0.191029	1.49273	0.982192	1.24591	0.87738	0.97543	0.473346	0.593372	0.923024	1.26113	0.669446	0.791163	0.493632	0.872308	2.03539	0.603516	0.603516	1.64826	0.637326	2.20444	1.89169	1.89507	0	0	0	0	0	0	0	0	0	0	0	0	0	0	0	0	0	0	0
HoxA_123|mm9|chr6:52265393-52268866	0.711709	0.248506	0.213006	0.544347	0.400653	0.267102	0.341485	0.368533	0.263721	0.823283	0.398963	0.400653	0.153837	0.478417	0.628873	0.344866	0.831736	0.611968	0.385439	0.42432	0.419249	0.569705	0.899357	0.32627	0.542657	1.00924	0.48856	0.667755	1.14786	1.48597	0	0	0	0	0	0	0	0	0	0	0	0	0	0	0	0	0	0	0
HoxA_124|mm9|chr6:52268866-52271073	0.784401	0.256959	0.503775	0.338104	0.238363	0.899357	0.420939	0.135242	0.223149	0.397272	0.371914	0.243435	0.363462	0.5528	0.551109	0.385439	0.904428	0.578158	0.0980502	0.305984	0.218077	0.513918	0.554491	0.331342	0.491941	1.37946	0.348247	0.865546	1.32706	0.919643	0	0	0	0	0	0	0	0	0	0	0	0	0	0	0	0	0	0	0
HoxA_125|mm9|chr6:52271073-52271271	0.42432	0.263721	0.427702	0.598444	0.081145	0.417558	0.202862	0.495322	0.126789	0.867237	0.256959	0.38882	0.1961	0.155528	0.600135	0.45475	0.701566	0.22822	0.759043	0.459821	0.278936	0.275555	0.530823	0.333032	0.469965	0.764115	0.32627	0.16398	0.285698	0.309365	0	0	0	0	0	0	0	0	0	0	0	0	0	0	0	0	0	0	0
HoxA_126|mm9|chr6:52271271-52272007	1.11067	0.48856	0.759043	0.103122	0.343176	1.16308	0.483489	0.113265	0.42263	0.571396	0.652541	0.890904	0.437845	0.453059	0.760734	0.370224	1.07517	0.953453	0.475036	0.701566	0.662684	0.919643	0.933167	0.623802	0.0101431	1.08531	0.985573	1.51132	1.19182	1.06672	0	0	0	0	0	0	0	0	0	0	0	0	0	0	0	0	0	0	0
HoxA_127|mm9|chr6:52272007-52273662	1.04981	0.263721	0.625492	0.507156	0.753972	0.71678	0.405725	0.245125	0.152147	0.826664	0.622111	0.977121	0.473346	0.639017	0.589991	0.365152	0.84526	1.1411	0.581539	0.571396	0.566324	0.760734	1.14786	0.513918	1.03629	0.912881	0.904428	1.27803	1.2831	1.02784	0	0	0	0	0	0	0	0	0	0	0	0	0	0	0	0	0	0	0
HoxA_129|mm9|chr6:52273751-52279265	0.787782	0.121717	0.207934	0.666065	0.363462	0.0540966	0.0726924	0.175814	0.101431	0.278936	0.19441	0.109884	0.118336	0.466583	0.199481	0.243435	0.547728	0.402344	0.322889	0.280626	0.109884	0.314437	0.87907	0.322889	0.187648	0.373605	0.415868	0.662684	0.704947	0.380367	0	0	0	0	0	0	0	0	0	0	0	0	0	0	0	0	0	0	0
HoxA_130|mm9|chr6:52279265-52282632	0.221458	0	0.103122	0.00169052	0.209624	0.172433	0.0439535	0.0355009	0	0.140313	0.152147	0.189338	0.133551	0.0946691	0.263721	0.0084526	0.125098	0.0270483	0.0642398	0.267102	0.529133	0.045644	0.0202862	0.158909	0.184267	0.204553	0.0355009	0.35839	0.0185957	0.26034	0	0	0	0	0	0	0	0	0	0	0	0	0	0	0	0	0	0	0
HoxA_133|mm9|chr6:52301128-52303118	0.184267	0	0.0743829	0.148766	0	0.0980502	0	0.0929786	0	0.0371914	0	0.0946691	0.0625492	0.0574777	0.16229	0.175814	0	0.0202862	0.108193	0.213006	0.0557872	0.169052	0	0.0574777	0	0.180886	0.180886	0.0912881	0.0524061	0.262031	0	0	0	0	0	0	0	0	0	0	0	0	0	0	0	0	0	0	0
HoxA_137|mm9|chr6:52313112-52316057	0.251887	0.145385	0	0.0490251	0.0338104	0	0.26034	0.250197	0.12848	0.338104	0.042263	0.0625492	0.104812	0.311056	0.081145	0	0.300913	0.150456	0.123408	0.417558	0	0.113265	0.147075	0.187648	0	0.366843	0.278936	0.458131	0.174124	0.147075	0	0	0	0	0	0	0	0	0	0	0	0	0	0	0	0	0	0	0
HoxA_139|mm9|chr6:52316168-52332467	0.0710018	0.125098	0	0.0659303	0.142004	0.0625492	0.0710018	0.042263	0	0.084526	0.116646	0.0540966	0.0591682	0	0	0.299222	0.0557872	0.131861	0.138623	0.189338	0.0507156	0.0693113	0.0625492	0.0777639	0	0.238363	0.206243	0.140313	0.218077	0.321199	0	0	0	0	0	0	0	0	0	0	0	0	0	0	0	0	0	0	0
HoxA_142|mm9|chr6:52334697-52337309	0.084526	0	0.0642398	0.0270483	0	0.114955	0	0.0439535	0.0507156	0.0794544	0.042263	0.0439535	0.106503	0	0.0794544	0.0270483	0.0929786	0.00338104	0.106503	0.0980502	0.0236673	0.0287388	0.00676208	0.0946691	0.0693113	0.248506	0.0287388	0.0642398	0.104812	0.148766	0	0	0	0	0	0	0	0	0	0	0	0	0	0	0	0	0	0	0
HoxA_143|mm9|chr6:52337309-52345436	0.224839	0.0473346	0	0.174124	0.0625492	0.0574777	0	0.0693113	0	0.0912881	0.111574	0.104812	0.108193	0	0.0862165	0	0.087907	0.201172	0.231601	0.113265	0.0946691	0.0743829	0.0557872	0.185957	0.123408	0.273864	0.0862165	0.309365	0.177505	0.165671	0	0	0	0	0	0	0	0	0	0	0	0	0	0	0	0	0	0	0
HoxA_146|mm9|chr6:52349868-52361783	0	0	0.104812	0	0.0287388	0.123408	0	0.0185957	0.0355009	0.0473346	0.0355009	0.104812	0.0304294	0.152147	0.0777639	0.0524061	0.084526	0.042263	0.0524061	0.0507156	0.042263	0.180886	0.13017	0.101431	0.0710018	0.0625492	0.0608587	0.16229	0.174124	0.121717	0	0	0	0	0	0	0	0	0	0	0	0	0	0	0	0	0	0	0
HoxA_147|mm9|chr6:52361783-52364459	0.16229	0.101431	0.0524061	0	0.120027	0	0	0	0.0608587	0.0828355	0.114955	0.0473346	0.0557872	0.126789	0	0.00338104	0.0726924	0.0946691	0.045644	0.135242	0.0490251	0	0.185957	0.109884	0.0777639	0	0	0.284007	0.213006	0.147075	0	0	0	0	0	0	0	0	0	0	0	0	0	0	0	0	0	0	0
HoxA_148|mm9|chr6:52364459-52367178	0.0862165	0	0	0.0169052	0	0.0591682	0	0.0084526	0.0710018	0.087907	0	0	0	0.042263	0	0.087907	0.0760734	0	0	0.0710018	0.0540966	0.111574	0.131861	0.0439535	0	0	0.038882	0.262031	0.109884	0.148766	0	0	0	0	0	0	0	0	0	0	0	0	0	0	0	0	0	0	0
HoxA_149|mm9|chr6:52367178-52369809	0.145385	0.0557872	0.0743829	0.216387	0.113265	0.236673	0.0794544	0.0693113	0.0574777	0	0.143694	0.143694	0.214696	0.0659303	0.180886	0.0591682	0.404034	0	0.167361	0.218077	0.278936	0.0710018	0	0.165671	0.087907	0.0625492	0.187648	0.311056	0.207934	0.136932	0	0	0	0	0	0	0	0	0	0	0	0	0	0	0	0	0	0	0
HoxA_150|mm9|chr6:52369809-52372052	0.133551	0	0	0	0	0	0.0659303	0	0	0.0980502	0.0253578	0.0608587	0.101431	0.0659303	0.0591682	0.0862165	0	0	0	0	0.0236673	0	0.0507156	0	0.123408	0.136932	0.0439535	0.0895976	0.0540966	0.0540966	0	0	0	0	0	0	0	0	0	0	0	0	0	0	0	0	0	0	0
HoxA_151|mm9|chr6:52372052-52381044	0.13017	0	0	0.157218	0.153837	0.0557872	0.0507156	0	0.0321199	0.0591682	0.0743829	0.314437	0	0.238363	0.0557872	0	0.101431	0.157218	0.0574777	0.104812	0.0828355	0.143694	0	0.0963596	0.0862165	0.25865	0.0760734	0.160599	0.084526	0.042263	0	0	0	0	0	0	0	0	0	0	0	0	0	0	0	0	0	0	0
HoxA_153|mm9|chr6:52381133-52383492	0.0828355	0	0	0.0625492	0.0490251	0	0.0557872	0	0	0.189338	0.113265	0.121717	0.084526	0.0743829	0.243435	0.0608587	0.0405725	0.167361	0.125098	0.262031	0.0507156	0.143694	0.265412	0.0524061	0.042263	0.0777639	0.287388	0.202862	0.302603	0.192719	0	0	0	0	0	0	0	0	0	0	0	0	0	0	0	0	0	0	0
HoxA_154|mm9|chr6:52383492-52387391	0.0997407	0	0	0.111574	0.140313	0.118336	0.00169052	0.0338104	0	0.0439535	0.104812	0.0625492	0.0895976	0.182576	0.109884	0.138623	0.338104	0.0710018	0.0574777	0	0.0524061	0.133551	0.160599	0	0.0794544	0	0.0253578	0.304294	0.0895976	0.0524061	0	0	0	0	0	0	0	0	0	0	0	0	0	0	0	0	0	0	0
HoxA_155|mm9|chr6:52387391-52392264	0.145385	0.0135242	0	0.0371914	0.0355009	0.0777639	0	0	0.0710018	0.214696	0.0439535	0	0.280626	0.175814	0.287388	0	0.0574777	0.197791	0	0	0	0.0101431	0	0.185957	0.250197	0.0574777	0	0.104812	0.131861	0.0693113	0	0	0	0	0	0	0	0	0	0	0	0	0	0	0	0	0	0	0
HoxA_156|mm9|chr6:52392264-52401093	0	0.136932	0.155528	0.00507156	0.116646	0	0.0912881	0.189338	0	0.147075	0	0.147075	0.0726924	0	0	0.108193	0.0710018	0	0.167361	0.147075	0.118336	0.0693113	0.0202862	0.042263	0.153837	0.0371914	0.189338	0	0.213006	0.0507156	0	0	0	0	0	0	0	0	0	0	0	0	0	0	0	0	0	0	0
HoxA_157|mm9|chr6:52401093-52402200	0.142004	0	0	0.177505	0	0	0.0591682	0.045644	0.0608587	0.0777639	0	0.0439535	0.0557872	0	0.081145	0.0169052	0	0	0	0.0524061	0.0355009	0	0.177505	0.138623	0.0439535	0.13017	0.0490251	0.0693113	0.0862165	0.104812	0	0	0	0	0	0	0	0	0	0	0	0	0	0	0	0	0	0	0
HoxA_158|mm9|chr6:52402200-52407151	0.0371914	0	0	0.0219768	0.12848	0.0557872	0.0473346	0	0.0642398	0	0	0.0270483	0	0	0	0.0507156	0.103122	0.0540966	0	0	0	0.0557872	0.13017	0	0.0591682	0	0.0574777	0.0997407	0.0473346	0.0760734	0	0	0	0	0	0	0	0	0	0	0	0	0	0	0	0	0	0	0
HoxA_161|mm9|chr6:52415131-52419678	0.199481	0.0726924	0	0.174124	0.0591682	0.0862165	0	0.126789	0.0202862	0.172433	0.241744	0	0.121717	0.101431	0	0	0.0777639	0.0895976	0	0.0929786	0.0574777	0.231601	0.0693113	0.344866	0.0726924	0.0929786	0.174124	0.0642398	0.172433	0.00169052	0	0	0	0	0	0	0	0	0	0	0	0	0	0	0	0	0	0	0
HoxA_163|mm9|chr6:52420006-52429375	0.0895976	0.0540966	0.081145	0.0591682	0.0439535	0.216387	0	0.0557872	0.0625492	0.0625492	0.170743	0	0.108193	0.241744	0.204553	0	0.0710018	0.0912881	0.383748	0.125098	0.0321199	0.0557872	0.201172	0	0.0355009	0.368533	0.148766	0.081145	0.167361	0.0439535	0	0	0	0	0	0	0	0	0	0	0	0	0	0	0	0	0	0	0
HoxA_165|mm9|chr6:52438705-52440652	0.0439535	0	0.0405725	0	0	0.0929786	0.0676208	0.0253578	0	0.109884	0	0	0.109884	0.0490251	0.0524061	0	0	0	0.0118336	0.0473346	0	0.0405725	0	0.0355009	0.0169052	0.0676208	0.0135242	0.126789	0	0	0	0	0	0	0	0	0	0	0	0	0	0	0	0	0	0	0	0	0
HoxA_167|mm9|chr6:52441759-52444151	0.126789	0.0473346	0.0574777	0.108193	0.0828355	0.0540966	0.0490251	0.0794544	0	0	0.0574777	0.0743829	0.157218	0.0726924	0.0743829	0.0591682	0.045644	0.00169052	0.0371914	0.0895976	0.0862165	0.126789	0.0557872	0.0760734	0.0693113	0.197791	0.0524061	0.207934	0.121717	0.245125	0	0	0	0	0	0	0	0	0	0	0	0	0	0	0	0	0	0	0
HoxA_168|mm9|chr6:52444151-52448361	0.282317	0	0	0.101431	0.0304294	0.0608587	0.118336	0.0608587	0	0	0	0.126789	0	0.0828355	0.0540966	0.0591682	0	0.087907	0.109884	0.0473346	0.0439535	0.0608587	0.152147	0.120027	0.087907	0.361771	0.0338104	0.108193	0.13017	0	0	0	0	0	0	0	0	0	0	0	0	0	0	0	0	0	0	0	0
HoxA_169|mm9|chr6:52448361-52449991	0.121717	0	0	0.0439535	0	0.148766	0.0608587	0.0439535	0	0.0794544	0.0574777	0	0	0.177505	0.143694	0.0524061	0	0	0	0.177505	0	0.150456	0.140313	0	0.084526	0.0929786	0.0169052	0.299222	0.116646	0.140313	0	0	0	0	0	0	0	0	0	0	0	0	0	0	0	0	0	0	0
HoxA_171|mm9|chr6:52450036-52462044	0	0	0.0895976	0.120027	0.0473346	0.32458	0	0.0321199	0	0.0963596	0.0676208	0	0	0.0574777	0.251887	0	0.108193	0	0.211315	0.148766	0.174124	0.0693113	0.155528	0.108193	0.0777639	0.338104	0.223149	0.339794	0.213006	0.0710018	0	0	0	0	0	0	0	0	0	0	0	0	0	0	0	0	0	0	0
HoxA_173|mm9|chr6:52464987-52470467	0.0219768	0.0473346	0	0	0.0929786	0.121717	0.0540966	0.0253578	0	0.0591682	0.0760734	0.104812	0.0777639	0.0101431	0.123408	0.157218	0.0574777	0.184267	0.136932	0.145385	0	0	0.0912881	0.087907	0.0895976	0.0743829	0.160599	0.116646	0	0	0	0	0	0	0	0	0	0	0	0	0	0	0	0	0	0	0	0	0
HoxA_174|mm9|chr6:52470467-52478865	0	0.00169052	0.084526	0	0.0659303	0.169052	0	0.158909	0.081145	0.0963596	0.143694	0.152147	0.182576	0.150456	0.00169052	0.0473346	0.16398	0.240054	0.0591682	0.172433	0.0912881	0.280626	0.00169052	0.214696	0.0287388	0.0321199	0.339794	0.378676	0.327961	0	0	0	0	0	0	0	0	0	0	0	0	0	0	0	0	0	0	0	0
HoxA_176|mm9|chr6:52483388-52490414	0.0693113	0.0490251	0.0507156	0.341485	0.169052	0.185957	0	0.0152147	0	0.0405725	0.0507156	0.0693113	0	0.16229	0	0.00169052	0.172433	0.081145	0	0.0557872	0.0659303	0.0794544	0.160599	0.0777639	0.0591682	0	0.12848	0.267102	0.153837	0.0659303	0	0	0	0	0	0	0	0	0	0	0	0	0	0	0	0	0	0	0
HoxA_177|mm9|chr6:52490414-52493874	0.343176	0.0219768	0	0.0439535	0.0659303	0.0574777	0	0.201172	0.0507156	0.243435	0.148766	0.229911	0.0862165	0.0591682	0	0.0828355	0.316127	0	0.0270483	0.081145	0.0726924	0.0439535	0.263721	0.0371914	0.155528	0.287388	0.336413	0.145385	0	0.160599	0	0	0	0	0	0	0	0	0	0	0	0	0	0	0	0	0	0	0
HoxA_178|mm9|chr6:52493874-52497394	0.084526	0	0.172433	0.29246	0.0625492	0.177505	0	0.114955	0.0828355	0.273864	0.0574777	0.160599	0.140313	0.471655	0.0693113	0	0.081145	0	0	0.365152	0.136932	0.0895976	0.121717	0.231601	0.238363	0.417558	0.153837	0.300913	0.243435	0.339794	0	0	0	0	0	0	0	0	0	0	0	0	0	0	0	0	0	0	0
HoxA_179|mm9|chr6:52497394-52497615	0	0	0	0.00169052	0.0726924	0	0	0.0304294	0	0	0	0.0642398	0	0	0.0659303	0.0371914	0	0	0.0253578	0.136932	0.038882	0.111574	0.0507156	0	0.0557872	0.0084526	0.042263	0.084526	0.0355009	0.0912881	0	0	0	0	0	0	0	0	0	0	0	0	0	0	0	0	0	0	0
HoxA_180|mm9|chr6:52497615-52497933	0.0828355	0	0	0	0.038882	1.35242	0	0	0	0.0676208	0	0.0794544	0.084526	0	0.118336	0	0.12848	0	0	0	0	0	0	0	0.0608587	0.0912881	0.0135242	0.0574777	0.234982	0.0693113	0	0	0	0	0	0	0	0	0	0	0	0	0	0	0	0	0	0	0
HoxA_181|mm9|chr6:52497933-52501912	0.0760734	0.0760734	0.081145	0.349938	0	0.121717	0	0.0828355	0.0659303	0.16398	0.140313	0.0473346	0	0.238363	0	0.229911	0.246816	0	0.0608587	0.0963596	0.101431	0.263721	0.0659303	0.169052	0.0371914	0.0828355	0.0693113	0.25865	0.0540966	0.147075	0	0	0	0	0	0	0	0	0	0	0	0	0	0	0	0	0	0	0
HoxA_182|mm9|chr6:52501912-52506069	0.0676208	0.0676208	0.0895976	0.155528	0.0253578	0.113265	0.133551	0.0794544	0	0.00169052	0.081145	0.201172	0	0.147075	0	0.148766	0.158909	0	0.0912881	0.116646	0.0439535	0.177505	0.238363	0	0.295841	0.157218	0.081145	0	0.150456	0.0659303	0	0	0	0	0	0	0	0	0	0	0	0	0	0	0	0	0	0	0
HoxA_185|mm9|chr6:52509879-52510899	0	0	0.0507156	0.13017	0.0236673	0.204553	0	0	0	0.00338104	0.123408	0.0253578	0	0	0.0608587	0	0.12848	0.087907	0.0338104	0.0338104	0.042263	0	0.00169052	0.0439535	0.0862165	0.0473346	0.0693113	0.0828355	0.0270483	0.042263	0	0	0	0	0	0	0	0	0	0	0	0	0	0	0	0	0	0	0
HoxA_187|mm9|chr6:52514325-52518961	0.1961	0.140313	0.0946691	0.224839	0.104812	0.253578	0	0.265412	0.0540966	0.346557	0.0338104	0.142004	0.211315	0.0304294	0.153837	0.0084526	0.0507156	0.0524061	0.174124	0.0405725	0.138623	0.0540966	0.0726924	0.138623	0.143694	0.398963	0.250197	0.170743	0.121717	0.278936	0	0	0	0	0	0	0	0	0	0	0	0	0	0	0	0	0	0	0
HoxA_189|mm9|chr6:52520631-52522484	0.309365	0.136932	0.0929786	0.136932	0.106503	0.150456	0	0.0862165	0	0	0.223149	0.0777639	0.0693113	0.150456	0	0.0710018	0.0355009	0.278936	0.184267	0	0.0895976	0.469965	0.0118336	0.0439535	0.197791	0.461512	0.0355009	0.652541	0.180886	0.157218	0	0	0	0	0	0	0	0	0	0	0	0	0	0	0	0	0	0	0
HoxA_191|mm9|chr6:52522985-52524187	0.153837	0.0760734	0.0743829	0.0338104	0.0676208	0.0710018	0	0	0	0	0.042263	0.206243	0.042263	0.0710018	0.0608587	0.0743829	0.0726924	0.042263	0.13017	0.191029	0.106503	0.224839	0.392201	0	0.255269	0.140313	0.042263	0.280626	0.231601	0.233292	0	0	0	0	0	0	0	0	0	0	0	0	0	0	0	0	0	0	0
HoxA_194|mm9|chr6:52527037-52527403	0.187648	0	0	0.0371914	0.0862165	0.160599	0	0.116646	0.081145	0.0980502	0.0304294	0.0693113	0.108193	0.104812	0.0473346	0.0777639	0.262031	0.0862165	0.0794544	0.12848	0	0.0676208	0.0760734	0.0777639	0.216387	0.155528	0.126789	0.29415	0.19441	0.22653	0	0	0	0	0	0	0	0	0	0	0	0	0	0	0	0	0	0	0
HoxA_195|mm9|chr6:52527403-52527763	0.214696	0.0693113	0.0760734	0.0743829	0.175814	0	0	0.106503	0	0.0828355	0.135242	0	0.0574777	0	0.084526	0	0.0507156	0.0743829	0	0.158909	0.206243	0	0.0608587	0.26034	0.191029	0.234982	0.262031	0	0.135242	0.290769	0	0	0	0	0	0	0	0	0	0	0	0	0	0	0	0	0	0	0
HoxA_196|mm9|chr6:52527763-52541897	0.202862	0	0.290769	0.343176	0.22653	0.22822	0.204553	0.407415	0	0.355009	0.175814	0.29415	0.16398	0.180886	0.458131	0.158909	0.469965	0.267102	0.108193	0.251887	0.0912881	0.231601	0.275555	0.321199	0.32458	0.131861	0.265412	0.765806	0.353319	0.277245	0	0	0	0	0	0	0	0	0	0	0	0	0	0	0	0	0	0	0
HoxA_197|mm9|chr6:52541897-52542057	0	0	0	0	0.140313	0.0828355	0	0.0185957	0	0	0	0	0.142004	0	0.12848	0.13017	0.104812	0.0524061	0.143694	0.1961	0	0	0.0608587	0.0980502	0.0591682	0.304294	0.145385	0.218077	0.451369	0.121717	0	0	0	0	0	0	0	0	0	0	0	0	0	0	0	0	0	0	0
HoxA_198|mm9|chr6:52542057-52542687	0.0338104	0.0828355	0.0355009	0	0.0473346	0.00169052	0	0.0270483	0	0.0405725	0.0997407	0	0.0371914	0.0946691	0	0.0473346	0.116646	0.0608587	0.0980502	0	0	0	0.0710018	0.038882	0.0490251	0.125098	0.0608587	0.26034	0.147075	0.229911	0	0	0	0	0	0	0	0	0	0	0	0	0	0	0	0	0	0	0
HoxA_199|mm9|chr6:52542687-52542962	0	0	0	0.150456	0	0	0	0.042263	0	0.0676208	0.113265	0	0.0608587	0.0963596	0	0	0	0	0	0	0	0	0	0	0	0.0439535	0.0524061	0.0152147	0	0	0	0	0	0	0	0	0	0	0	0	0	0	0	0	0	0	0	0	0
HoxA_201|mm9|chr6:52545386-52551985	0	0.0473346	0	0	0.0253578	0	0	0	0	0	0	0	0	0.0760734	0	0	0.0794544	0	0.0608587	0	0.0676208	0	0.0760734	0.0355009	0.0743829	0.170743	0.042263	0.471655	0.120027	0.038882	0	0	0	0	0	0	0	0	0	0	0	0	0	0	0	0	0	0	0
HoxA_202|mm9|chr6:52551985-52562232	0.0794544	0	0	0.0152147	0.108193	0.383748	0.165671	0.174124	0.0118336	0.251887	0.0355009	0.300913	0.13017	0.218077	0.111574	0.185957	0.312746	0	0.0405725	0.290769	0.0642398	0	0.0659303	0.084526	0.221458	0.302603	0.319508	0.307675	0.317818	0.321199	0	0	0	0	0	0	0	0	0	0	0	0	0	0	0	0	0	0	0
HoxA_203|mm9|chr6:52562232-52568056	0.466583	0	0.118336	0.0270483	0.113265	0.131861	0	0.0963596	0.184267	0.547728	0.206243	0	0.3567	0.0710018	0.13017	0	0.316127	0.0693113	0.22653	0.0625492	0.160599	0.346557	0.0676208	0.147075	0.245125	0.392201	0.0676208	0.508846	0.370224	0.155528	0	0	0	0	0	0	0	0	0	0	0	0	0	0	0	0	0	0	0
HoxA_206|mm9|chr6:52575680-52581530	0.0760734	0	0	0.0152147	0	0.370224	0.0794544	0.0219768	0	0.404034	0	0.223149	0.0794544	0.16229	0.108193	0.0676208	0.106503	0.302603	0.19441	0.263721	0.045644	0.0524061	0.189338	0.284007	0.131861	0.0642398	0.155528	0.534204	0.262031	0.185957	0	0	0	0	0	0	0	0	0	0	0	0	0	0	0	0	0	0	0
HoxA_208|mm9|chr6:52582510-52584015	0.0794544	0	0	0	0.106503	0.103122	0	0.0287388	0.0405725	0	0.1961	0	0.167361	0.142004	0.142004	0.0371914	0.0557872	0.175814	0.111574	0.103122	0	0.042263	0.0507156	0	0.0862165	0.138623	0.038882	0.290769	0.0963596	0.106503	0	0	0	0	0	0	0	0	0	0	0	0	0	0	0	0	0	0	0
HoxA_210|mm9|chr6:52584025-52588283	0.0625492	0.0574777	0.0625492	0.179195	0.101431	0.272174	0.0574777	0.042263	0.0676208	0.123408	0.0355009	0.109884	0.0321199	0.174124	0.123408	0.045644	0.16229	0.045644	0.145385	0.184267	0.0912881	0.185957	0.126789	0.081145	0.167361	0.126789	0.223149	0.300913	0.387129	0.0591682	0	0	0	0	0	0	0	0	0	0	0	0	0	0	0	0	0	0	0
HoxA_211|mm9|chr6:52588283-52590517	0.160599	0.0557872	0.219768	0.214696	0.101431	0.147075	0.0524061	0.0591682	0	0.00169052	0.150456	0.568015	0	0.0862165	0.125098	0.167361	0.547728	0.277245	0.272174	0.434464	0	0	0.0828355	0.180886	0.116646	0.606897	0.1961	0.544347	0.223149	0.160599	0	0	0	0	0	0	0	0	0	0	0	0	0	0	0	0	0	0	0
HoxA_221|mm9|chr6:52627105-52628031	0.0659303	0	0.0169052	0.0473346	0.135242	0.180886	0.0371914	0	0	0	0	0.153837	0.0185957	0.0524061	0.0540966	0.0540966	0.0473346	0.0710018	0	0.0439535	0	0.0524061	0.0473346	0.0946691	0.0862165	0.0726924	0.0828355	0.13017	0.0946691	0.0405725	0	0	0	0	0	0	0	0	0	0	0	0	0	0	0	0	0	0	0
HoxA_225|mm9|chr6:52637837-52641317	0.0625492	0	0	0.172433	0.192719	0.0828355	0.114955	0	0	0	0.13017	0.0828355	0.0473346	0	0.256959	0.0507156	0.045644	0	0.0912881	0.0929786	0.0760734	0	0	0.120027	0.143694	0	0.118336	0.241744	0.223149	0.207934	0	0	0	0	0	0	0	0	0	0	0	0	0	0	0	0	0	0	0
HoxA_226|mm9|chr6:52641318-52647573	0.409106	0.106503	0.0828355	0.382057	0.250197	0.218077	0	0.045644	0.0219768	0.48687	0.180886	0.0574777	0.160599	0.234982	0.245125	0.0338104	0.344866	0	0.0693113	0.16229	0.175814	0.0912881	0.179195	0.0507156	0.285698	0.087907	0.256959	0.973739	0.280626	0.307675	0	0	0	0	0	0	0	0	0	0	0	0	0	0	0	0	0	0	0
HoxA_228|mm9|chr6:52656263-52657321	0.265412	0.0659303	0	0.179195	0.0490251	0.150456	0	0	0	0.167361	0	0	0.22653	0.0777639	0	0.118336	0	0.160599	0.147075	0	0.0591682	0.126789	0.233292	0.142004	0	0.199481	0.314437	0.0743829	0.0946691	0	0	0	0	0	0	0	0	0	0	0	0	0	0	0	0	0	0	0	0
HoxA_229|mm9|chr6:52657322-52658513	0.191029	0	0	0.327961	0	0.0253578	0	0	0	0.268793	0.0591682	0	0	0.123408	0	0.13017	0	0.126789	0.116646	0.38882	0	0.12848	0.170743	0.116646	0.12848	0.0574777	0.184267	0.16229	0.197791	0.243435	0	0	0	0	0	0	0	0	0	0	0	0	0	0	0	0	0	0	0
HoxA_235|mm9|chr6:52693850-52694645	0.148766	0.084526	0.131861	0.250197	0.0557872	0	0.0608587	0.0895976	0	0	0.0895976	0.00169052	0.185957	0.0743829	0.121717	0.143694	0	0	0.084526	0	0	0.211315	0.214696	0.197791	0.182576	0.576467	0.12848	0.68128	0.304294	0.447988	0	0	0	0	0	0	0	0	0	0	0	0	0	0	0	0	0	0	0
HoxA_237|mm9|chr6:52669639-52701839	0	0	0	0.16229	0.0980502	0	0	0.0507156	0	0	0.0490251	0	0.0693113	0.081145	0	0.0507156	0.045644	0.101431	0.042263	0	0	0.0270483	0.157218	0	0.0338104	0	0.0574777	0.444607	0.109884	0.234982	0	0	0	0	0	0	0	0	0	0	0	0	0	0	0	0	0	0	0
HoxA_238|mm9|chr6:52701840-52704692	0.121717	0.157218	0	0.0659303	0.0862165	0.246816	0.170743	0	0	0.101431	0.038882	0.135242	0.0540966	0.236673	0.125098	0.0574777	0.133551	0.0912881	0.0574777	0.0642398	0.189338	0.216387	0.0929786	0.0439535	0.420939	0.442916	0.165671	0.796235	0.245125	0.297532	0	0	0	0	0	0	0	0	0	0	0	0	0	0	0	0	0	0	0
HoxA_239|mm9|chr6:52704693-52706024	0.158909	0	0.0236673	0	0.206243	0.0862165	0	0	0	0.16398	0.0777639	0	0.0726924	0.081145	0	0.00169052	0.0777639	0.158909	0.138623	0.0794544	0.0642398	0	0.0895976	0.0524061	0.123408	0.180886	0.147075	0.273864	0.22822	0.233292	0	0	0	0	0	0	0	0	0	0	0	0	0	0	0	0	0	0	0
HoxA_240|mm9|chr6:52706025-52718534	0.0997407	0	0	0.0912881	0	0.0574777	0.0912881	0.108193	0	0.12848	0.0743829	0.116646	0.0540966	0	0.0557872	0	0.165671	0.0946691	0	0.0760734	0.0490251	0.0625492	0.0659303	0.0777639	0.0355009	0.108193	0.140313	0.22653	0.199481	0.109884	0	0	0	0	0	0	0	0	0	0	0	0	0	0	0	0	0	0	0
HoxA_241|mm9|chr6:52718535-52721479	0.211315	0	0	0.0371914	0.123408	0.0676208	0	0.0405725	0.103122	0.174124	0.0574777	0	0	0.0439535	0.0490251	0	0.125098	0.214696	0.087907	0.042263	0.131861	0.0760734	0.0693113	0.0355009	0	0.0642398	0.140313	0.0338104	0.143694	0.211315	0	0	0	0	0	0	0	0	0	0	0	0	0	0	0	0	0	0	0
HoxA_243|mm9|chr6:52723090-52725748	0.0591682	0	0	0.0507156	0.0236673	0.0540966	0	0.0236673	0	0.0557872	0.0338104	0.16398	0.0253578	0.0862165	0.0726924	0	0.140313	0.0676208	0.0676208	0.0743829	0.042263	0.038882	0.045644	0	0.0760734	0.0946691	0.103122	0.0625492	0.135242	0.109884	0	0	0	0	0	0	0	0	0	0	0	0	0	0	0	0	0	0	0
HoxA_248|mm9|chr6:52741675-52742100	0	0.042263	0	0.131861	0.0287388	0	0	0	0	0.0659303	0	0.0642398	0	0	0	0	0	0	0.0710018	0	0.109884	0	0	0.0405725	0.0355009	0	0.113265	0	0.111574	0.12848	0	0	0	0	0	0	0	0	0	0	0	0	0	0	0	0	0	0	0
HoxA_249|mm9|chr6:52742101-52748549	0.246816	0.0608587	0.12848	0.140313	0.238363	0.382057	0	0.111574	0.12848	0.147075	0.155528	0.0473346	0.191029	0.185957	0.0693113	0.0693113	0.22653	0.145385	0.0642398	0.13017	0.143694	0.143694	0.0524061	0.0405725	0.218077	0	0.157218	0.270483	0.160599	0.277245	0	0	0	0	0	0	0	0	0	0	0	0	0	0	0	0	0	0	0
HoxA_251|mm9|chr6:52748770-52752905	0.42263	0	0	0.121717	0.0338104	0.172433	0.0524061	0	0.135242	0.0659303	0.22653	0.0608587	0.104812	0.116646	0.272174	0	0.153837	0.0760734	0.081145	0.284007	0.0169052	0.0169052	0.346557	0.0997407	0.180886	0.238363	0.331342	0.704947	0.135242	0.22653	0	0	0	0	0	0	0	0	0	0	0	0	0	0	0	0	0	0	0
HoxA_255|mm9|chr6:52759240-52771163	0	0	0.0439535	0.169052	0.109884	0.197791	0.170743	0.126789	0.045644	0.106503	0.0574777	0.224839	0.0439535	0	0.0676208	0.114955	0.101431	0.142004	0.231601	0.0794544	0.042263	0.121717	0.12848	0.101431	0.126789	0.278936	0.213006	0.211315	0.113265	0.218077	0	0	0	0	0	0	0	0	0	0	0	0	0	0	0	0	0	0	0
HoxA_256|mm9|chr6:52771164-52772646	0.0963596	0	0	0.126789	0	0.108193	0.0338104	0	0.0625492	0.0912881	0.087907	0	0.207934	0.0642398	0	0.0557872	0.207934	0.0608587	0.0946691	0.182576	0.0693113	0.0490251	0.0710018	0.104812	0.148766	0.0473346	0.185957	0.441226	0.177505	0	0	0	0	0	0	0	0	0	0	0	0	0	0	0	0	0	0	0	0
HoxA_257|mm9|chr6:52772647-52777261	0.0591682	0	0.157218	0.081145	0.175814	0.174124	0	0.0659303	0.0659303	0.12848	0	0.104812	0	0.201172	0.113265	0	0.26034	0.0625492	0	0.0676208	0.0355009	0.302603	0.373605	0.0219768	0.0963596	0.0591682	0.251887	0.637326	0.145385	0.253578	0	0	0	0	0	0	0	0	0	0	0	0	0	0	0	0	0	0	0
HoxA_258|mm9|chr6:52777262-52778607	0.174124	0.0710018	0	0.0929786	0.185957	0.211315	0.0557872	0	0.236673	0.361771	0.0980502	0.0118336	0.0963596	0.0473346	0.125098	0.104812	0.224839	0.120027	0.0405725	0.158909	0.0338104	0.233292	0.395582	0.0828355	0.197791	0.16398	0.204553	0.368533	0.361771	0.177505	0	0	0	0	0	0	0	0	0	0	0	0	0	0	0	0	0	0	0
HoxA_262|mm9|chr6:52793374-52801167	0	0.045644	0.224839	0.192719	0.0371914	0.174124	0.0490251	0.0338104	0	0.0625492	0.087907	0.1961	0	0	0.179195	0.0321199	0.104812	0	0.0895976	0.202862	0.0895976	0.0625492	0.343176	0.0219768	0.143694	0.179195	0.120027	0.042263	0.321199	0.0980502	0	0	0	0	0	0	0	0	0	0	0	0	0	0	0	0	0	0	0
HoxA_263|mm9|chr6:52801169-52803285	0.547728	0.0946691	0	0.564634	0.00338104	0.187648	0.0710018	0.045644	0.174124	0.170743	0.272174	0.48856	0.299222	0.432773	0.0743829	0.376986	0.327961	0.280626	0.341485	0.321199	0.376986	0.309365	0.142004	0.361771	0.268793	0.684661	0.248506	1.05488	0.718471	0.197791	0	0	0	0	0	0	0	0	0	0	0	0	0	0	0	0	0	0	0
HoxA_264|mm9|chr6:52803286-52809464	0.0929786	0.0659303	0.081145	0.420939	0.106503	0.253578	0.0659303	0.131861	0.0726924	0.22822	0.0743829	0.158909	0.0405725	0.042263	0.0507156	0.169052	0.250197	0.0659303	0.126789	0.300913	0.180886	0.304294	0.218077	0.187648	0.202862	0.175814	0.321199	0.5528	0.26034	0.299222	0	0	0	0	0	0	0	0	0	0	0	0	0	0	0	0	0	0	0
HoxA_265|mm9|chr6:52809465-52817061	0	0.0490251	0.0777639	0.3567	0.0693113	0.355009	0.042263	0.243435	0	0.0743829	0.123408	0.038882	0.184267	0.038882	0.0439535	0.0862165	0.165671	0.0642398	0.209624	0.277245	0.1961	0.0710018	0	0.191029	0.104812	0.120027	0.165671	0	0.238363	0	0	0	0	0	0	0	0	0	0	0	0	0	0	0	0	0	0	0	0
HoxA_267|mm9|chr6:52817090-52817285	0	0	0	0	0	0.0355009	0	0	0	0.042263	0.0338104	0.038882	0	0	0	0.0219768	0	0	0.0253578	0.0439535	0	0	0	0	0	0.042263	0.0794544	0.0625492	0.0490251	0.0760734	0	0	0	0	0	0	0	0	0	0	0	0	0	0	0	0	0	0	0
HoxA_268|mm9|chr6:52817286-52820895	0.243435	0	0.0676208	0.16229	0.104812	0.12848	0.209624	0.0591682	0	0	0.152147	0.238363	0.0710018	0.0405725	0.209624	0.087907	0.125098	0.157218	0	0.0676208	0.143694	0.00338104	0.0760734	0.0642398	0.0355009	0.42263	0.101431	0.431083	0.108193	0.126789	0	0	0	0	0	0	0	0	0	0	0	0	0	0	0	0	0	0	0
HoxA_269|mm9|chr6:52820896-52831247	0.319508	0.103122	0.0574777	0.042263	0.16229	0.192719	0	0.0490251	0.0895976	0	0.202862	0.0625492	0.103122	0.172433	0.131861	0.0270483	0.206243	0.152147	0	0.126789	0.12848	0.312746	0.246816	0.138623	0.0355009	0.290769	0.307675	0.52068	0.319508	0.412487	0	0	0	0	0	0	0	0	0	0	0	0	0	0	0	0	0	0	0
HoxA_270|mm9|chr6:52831248-52832456	0.0591682	0.0524061	0.13017	0.0828355	0.109884	0.153837	0.0405725	0	0	0.0777639	0.121717	0.300913	0.0253578	0.0540966	0	0.0557872	0.114955	0.22822	0.0507156	0.0693113	0.138623	0.135242	0.334723	0.0490251	0	0.0760734	0.0862165	0.375295	0.250197	0.182576	0	0	0	0	0	0	0	0	0	0	0	0	0	0	0	0	0	0	0
HoxA_272|mm9|chr6:52832471-52841533	0.0963596	0.0338104	0	0.231601	0.101431	0.0557872	0.045644	0.0490251	0.120027	0.118336	0	0.101431	0.133551	0.0726924	0.0507156	0.087907	0.116646	0.113265	0.201172	0.167361	0.138623	0.157218	0.135242	0.103122	0.038882	0.0524061	0.133551	0.13017	0.150456	0.148766	0	0	0	0	0	0	0	0	0	0	0	0	0	0	0	0	0	0	0
HoxA_273|mm9|chr6:52841534-52842038	0.00169052	0	0	0	0	0	0	0	0	0	0	0	0.00169052	0	0	0	0	0.00169052	0	0	0	0.00169052	0	0	0	0	0	0	0	0	0	0	0	0	0	0	0	0	0	0	0	0	0	0	0	0	0	0	0
HoxA_274|mm9|chr6:52842039-52843690	0.0540966	0	0.29415	0.160599	0.0338104	0.471655	0	0.0355009	0	0.155528	0.0304294	0.108193	0	0	0.16229	0.111574	0.199481	0.157218	0.0760734	0.16398	0.287388	0	0.0693113	0.19441	0.140313	0.268793	0.0253578	0.0490251	0.13017	0.16229	0	0	0	0	0	0	0	0	0	0	0	0	0	0	0	0	0	0	0
HoxA_277|mm9|chr6:52848364-52850692	0.185957	0	0	0.087907	0.0557872	0.0659303	0	0.0828355	0.0355009	0.0726924	0.0895976	0.0507156	0.0507156	0.192719	0.253578	0	0.241744	0	0	0.329651	0.0169052	0.123408	0.344866	0.106503	0.045644	0.240054	0.0743829	0.349938	0.197791	0.42263	0	0	0	0	0	0	0	0	0	0	0	0	0	0	0	0	0	0	0
HoxA_278|mm9|chr6:52850693-52851731	0.125098	0	0	0.0659303	0.0439535	0	0.0693113	0.109884	0.0490251	0.135242	0	0.0439535	0	0.0473346	0	0	0.111574	0	0	0	0.0338104	0.114955	0	0.192719	0	0.192719	0.0355009	0.0405725	0.0321199	0.111574	0	0	0	0	0	0	0	0	0	0	0	0	0	0	0	0	0	0	0
HoxA_280|mm9|chr6:52858040-52858605	0.0726924	0.0524061	0	0.0473346	0.0760734	0.111574	0.0710018	0.0557872	0.0490251	0.133551	0.0946691	0.147075	0.131861	0.243435	0.0710018	0	0.22653	0.145385	0.0507156	0.0828355	0	0.316127	0.120027	0.0169052	0	0.0270483	0.0540966	0.256959	0.0794544	0.038882	0	0	0	0	0	0	0	0	0	0	0	0	0	0	0	0	0	0	0
HoxA_281|mm9|chr6:52858606-52865393	0.0828355	0.120027	0.00169052	0.108193	0.103122	0.0676208	0	0.150456	0	0.19441	0.0574777	0.267102	0	0.177505	0.185957	0.32458	0.490251	0	0.201172	0.299222	0.0726924	0.174124	0	0.398963	0.378676	0.199481	0.420939	0.378676	0.48687	0.118336	0	0	0	0	0	0	0	0	0	0	0	0	0	0	0	0	0	0	0
HoxA_284|mm9|chr6:52871142-52873703	0.143694	0.0642398	0	0.138623	0.0490251	0.270483	0	0.175814	0	0.229911	0.202862	0.16398	0	0.26034	0.0676208	0.0676208	0.165671	0	0.223149	0.0743829	0.0507156	0.084526	0.35839	0.038882	0.180886	0.150456	0.206243	0.307675	0.473346	0.338104	0	0	0	0	0	0	0	0	0	0	0	0	0	0	0	0	0	0	0
HoxA_285|mm9|chr6:52873704-52878849	0.0473346	0	0.00169052	0.00169052	0.0287388	0.0304294	0	0.00169052	0	0.103122	0	0.045644	0.0371914	0.0777639	0.0355009	0	0.0236673	0.0405725	0.0507156	0.179195	0.0557872	0.00338104	0	0.0405725	0.0135242	0.038882	0.0084526	0.136932	0.103122	0	0	0	0	0	0	0	0	0	0	0	0	0	0	0	0	0	0	0	0
HoxA_286|mm9|chr6:52878850-52881665	0.179195	0	0	0.116646	0.172433	0.273864	0.0828355	0.0794544	0.0574777	0.00169052	0.169052	0.375295	0.0743829	0.125098	0.182576	0.111574	0.109884	0.0912881	0	0.177505	0.101431	0.182576	0.135242	0.0473346	0.0253578	0.305984	0.262031	0.383748	0.339794	0.29246	0	0	0	0	0	0	0	0	0	0	0	0	0	0	0	0	0	0	0
HoxA_287|mm9|chr6:52881666-52885980	0.0777639	0	0.0693113	0.42432	0.148766	0.0929786	0.00169052	0	0.202862	0.0743829	0.0524061	0.0760734	0.165671	0.241744	0.143694	0	0.174124	0.148766	0	0	0.218077	0.0743829	0.251887	0.152147	0.0490251	0.214696	0.344866	0.710018	0.35839	0.370224	0	0	0	0	0	0	0	0	0	0	0	0	0	0	0	0	0	0	0
HoxA_288|mm9|chr6:52885981-52888326	0.0659303	0.118336	0	0.0507156	0.135242	0.150456	0	0.0743829	0	0.0743829	0.0371914	0.116646	0.042263	0.0490251	0.0693113	0	0.038882	0.0591682	0.0524061	0.0642398	0.0574777	0.0625492	0.121717	0.0321199	0	0.0659303	0.084526	0.464893	0.0963596	0.0625492	0	0	0	0	0	0	0	0	0	0	0	0	0	0	0	0	0	0	0
HoxA_289|mm9|chr6:52888327-52890013	0	0	0	0.126789	0.0439535	0.0693113	0.0152147	0.0540966	0	0.153837	0.045644	0	0.109884	0.0253578	0.081145	0.0676208	0.12848	0	0.0912881	0.0710018	0.0540966	0.120027	0	0.121717	0.0895976	0.302603	0.0507156	0.0693113	0.233292	0.442916	0	0	0	0	0	0	0	0	0	0	0	0	0	0	0	0	0	0	0
HoxA_290|mm9|chr6:52890014-52897320	0.042263	0	0.0777639	0.00169052	0.00338104	0.118336	0	0.0557872	0.0304294	0.268793	0	0.120027	0.045644	0.187648	0.081145	0.042263	0.0540966	0	0.0946691	0.0355009	0.131861	0	0.0794544	0.0963596	0.109884	0.113265	0.0371914	0.158909	0.0912881	0.121717	0	0	0	0	0	0	0	0	0	0	0	0	0	0	0	0	0	0	0
HoxA_291|mm9|chr6:52897321-52911313	0.138623	0.0557872	0	0.297532	0.0980502	0.300913	0	0.042263	0	0.184267	0.138623	0.13017	0.0710018	0.204553	0.0726924	0.0726924	0.246816	0.32458	0.158909	0.277245	0.0591682	0.278936	0.22653	0.182576	0.0676208	0.216387	0.382057	0.373605	0.412487	0.145385	0	0	0	0	0	0	0	0	0	0	0	0	0	0	0	0	0	0	0
HoxA_292|mm9|chr6:52911314-52914397	0	0	0	0.0760734	0.087907	0.317818	0	0.0473346	0	0.155528	0.12848	0.116646	0.087907	0.0608587	0.180886	0.0084526	0.0997407	0	0.148766	0.219768	0.0507156	0	0.0828355	0.152147	0.0777639	0.202862	0.167361	0.363462	0.255269	0.104812	0	0	0	0	0	0	0	0	0	0	0	0	0	0	0	0	0	0	0
HoxA_293|mm9|chr6:52914398-52918137	0.229911	0.126789	0	0.0574777	0.087907	0.209624	0	0.0726924	0	0.0473346	0.084526	0	0.0591682	0.26034	0.169052	0.170743	0.13017	0.0625492	0.114955	0.0642398	0.280626	0.160599	0.00169052	0.22822	0.207934	0	0.179195	0.730305	0.282317	0.152147	0	0	0	0	0	0	0	0	0	0	0	0	0	0	0	0	0	0	0
HoxA_295|mm9|chr6:52918252-52919700	0.0118336	0.00338104	0.0185957	0.045644	0.0185957	0.206243	0	0.00338104	0.111574	0.0980502	0.256959	0.0507156	0	0.223149	0.0574777	0.0084526	0	0.0439535	0.0405725	0.121717	0.0591682	0.0287388	0.0118336	0.0202862	0.00507156	0.114955	0.00338104	0.329651	0.22822	0.236673	0	0	0	0	0	0	0	0	0	0	0	0	0	0	0	0	0	0	0
HoxA_296|mm9|chr6:52919701-52924303	0.270483	0	0.042263	0.106503	0.0169052	0.0473346	0.038882	0	0	0	0.038882	0.0507156	0	0	0.13017	0.0828355	0.221458	0.143694	0.145385	0.136932	0	0.140313	0.179195	0.0997407	0.0490251	0.0439535	0.108193	0.285698	0.263721	0.0794544	0	0	0	0	0	0	0	0	0	0	0	0	0	0	0	0	0	0	0
HoxA_297|mm9|chr6:52924304-52933041	0.216387	0.0321199	0.045644	0.00338104	0.108193	0.175814	0.0710018	0.282317	0	0.121717	0.084526	0.267102	0.0591682	0.114955	0.0473346	0.0743829	0	0.133551	0.0625492	0.262031	0.0912881	0.0355009	0.0490251	0.0524061	0.152147	0.157218	0.1961	0.497013	0.0540966	0.365152	0	0	0	0	0	0	0	0	0	0	0	0	0	0	0	0	0	0	0
HoxA_298|mm9|chr6:52933042-52942459	0.0659303	0	0	0.0507156	0.0760734	0.0693113	0	0.109884	0.0557872	0.238363	0.238363	0.170743	0.0540966	0.152147	0.19441	0.114955	0	0.140313	0.189338	0.00676208	0.157218	0.243435	0.197791	0.118336	0.243435	0.0693113	0.0777639	0.29246	0.251887	0.415868	0	0	0	0	0	0	0	0	0	0	0	0	0	0	0	0	0	0	0
HoxA_302|mm9|chr6:52952345-52960689	0.00338104	0	0	0.0574777	0.209624	0.0152147	0	0.106503	0	0.241744	0.045644	0.0828355	0.0574777	0.0760734	0.12848	0.081145	0	0.0828355	0.138623	0.0557872	0.042263	0	0.0642398	0.143694	0	0.207934	0.172433	0.12848	0.240054	0	0	0	0	0	0	0	0	0	0	0	0	0	0	0	0	0	0	0	0
HoxA_303|mm9|chr6:52960690-52967527	0	0	0.0676208	0.0591682	0.0760734	0.0760734	0.0591682	0	0.0608587	0.087907	0.0557872	0	0	0.0726924	0.12848	0.25865	0.0794544	0	0.0659303	0	0.0997407	0.118336	0.084526	0.0659303	0.204553	0.0608587	0.0862165	0.375295	0.12848	0.106503	0	0	0	0	0	0	0	0	0	0	0	0	0	0	0	0	0	0	0
HoxA_304|mm9|chr6:52967528-52968961	0.140313	0	0.0439535	0.0473346	0.0557872	0	0.0828355	0	0.0591682	0.133551	0.13017	0.0574777	0.038882	0.174124	0.121717	0.0253578	0.106503	0	0	0.0524061	0	0	0.131861	0	0.16398	0.0524061	0.0405725	0.0912881	0.0710018	0.0608587	0	0	0	0	0	0	0	0	0	0	0	0	0	0	0	0	0	0	0
HoxA_308|mm9|chr6:52979969-52985775	0.138623	0.0726924	0	0.116646	0.143694	0.0659303	0.12848	0.0507156	0	0.120027	0	0.13017	0.0439535	0.126789	0.126789	0.121717	0.0642398	0.0591682	0	0.084526	0.136932	0.0405725	0.126789	0	0.0963596	0.214696	0.207934	0.0659303	0.0760734	0.12848	0	0	0	0	0	0	0	0	0	0	0	0	0	0	0	0	0	0	0
HoxA_311|mm9|chr6:52990950-53001211	0	0.0540966	0.0794544	0	0.106503	0	0.169052	0	0	0.167361	0	0	0.184267	0.0693113	0.0659303	0.191029	0	0	0	0.0321199	0	0	0.108193	0.0304294	0.131861	0.081145	0.0710018	0.0710018	0.175814	0.253578	0	0	0	0	0	0	0	0	0	0	0	0	0	0	0	0	0	0	0
HoxA_316|mm9|chr6:53013811-53020160	0.165671	0.0676208	0.0946691	0.148766	0.0490251	0.0743829	0	0.0540966	0	0	0.116646	0.0642398	0.0693113	0.0726924	0	0.0642398	0.126789	0	0.136932	0.0726924	0.0490251	0.084526	0.0912881	0.0439535	0.0625492	0.233292	0.0777639	0.081145	0.101431	0.0710018	0	0	0	0	0	0	0	0	0	0	0	0	0	0	0	0	0	0	0
HoxA_317|mm9|chr6:53020161-53021219	0	0	0	0	0.045644	0	0	0.045644	0.0693113	0	0	0.160599	0.0760734	0	0.104812	0.0743829	0	0	0.135242	0	0.0304294	0	0	0.0490251	0.0743829	0	0.0439535	0.155528	0	0	0	0	0	0	0	0	0	0	0	0	0	0	0	0	0	0	0	0	0
HoxA_322|mm9|chr6:53026446-53031824	0.0540966	0	0.0625492	0.045644	0.143694	0.216387	0	0.101431	0	0	0.0355009	0	0	0.0693113	0	0.125098	0.0490251	0.0743829	0	0.109884	0	0.120027	0.103122	0.0997407	0.0963596	0.0371914	0.0202862	0.295841	0.12848	0.0642398	0	0	0	0	0	0	0	0	0	0	0	0	0	0	0	0	0	0	0
HoxA_323|mm9|chr6:53031825-53033187	0.0743829	0	0	0	0.104812	0.0693113	0	0.0794544	0	0	0.0405725	0	0	0.045644	0	0.123408	0.0338104	0.0777639	0	0	0	0.081145	0	0	0.0439535	0.0980502	0	0.0777639	0.0676208	0	0	0	0	0	0	0	0	0	0	0	0	0	0	0	0	0	0	0	0
HoxA_324|mm9|chr6:53033188-53035208	0	0	0.087907	0	0.0524061	0.106503	0.0473346	0.0439535	0	0	0.0557872	0.153837	0	0	0.126789	0	0.0726924	0	0	0.231601	0	0	0	0	0.136932	0	0.142004	0.22822	0.045644	0.224839	0	0	0	0	0	0	0	0	0	0	0	0	0	0	0	0	0	0	0
HoxA_325|mm9|chr6:53035209-53036923	0	0	0	0	0	0.0676208	0	0.0371914	0	0.0625492	0.081145	0	0	0	0	0	0.0169052	0	0	0	0.143694	0.147075	0	0.0743829	0.0405725	0.263721	0.0169052	0.0710018	0	0.0507156	0	0	0	0	0	0	0	0	0	0	0	0	0	0	0	0	0	0	0
HoxA_327|mm9|chr6:53039978-53044657	0	0	0	0.12848	0	0.081145	0.0659303	0.0338104	0.0963596	0.084526	0	0.0659303	0.0659303	0	0	0.0608587	0.138623	0	0.0777639	0.282317	0.0540966	0	0.0828355	0.0355009	0.179195	0	0.0946691	0	0	0	0	0	0	0	0	0	0	0	0	0	0	0	0	0	0	0	0	0	0
[truncated: 114 more columns]
