# Supplementary material for: Clustering of Tissue-Specific Sub-TADs Accompanies the Regulation of HoxA Genes in Developing Limbs
Source: PLoS Genet. 2013 Dec 26;9(12):e1004018. doi: 10.1371/journal.pgen.1004018 (PMC3873244; doi:10.1371/journal.pgen.1004018)
Supplement: Table S20 — Mouse 5C results for the head replicate 1 anchored “cluster R” design (using the 3C library protocol for a small number of cells). Biological replicate of the head 5C dataset presented in matrix format. This 5C data is shown in Figure S3 (bottom), and was generated from head tissue 3C libraries produced with a 3C protocol for a small number of cells (see Materials and Methods). Predicted EcoRI restriction fragments and corresponding genomic regions are named at the top of each column and on the left of each row. Intersecting rows and columns identify the pair-wise contacts corresponding to interaction frequencies. The 5C data was filtered as described in Materials and Methods, and is normalized based on the number of sequence reads per 1,000. (XLSX) [file pgen.1004018.s028.xlsx]

## Sheet: Table S20. Head replicate (Shh)
Table S20. Mouse 5C results for the head replicate 1 anchored "cluster R" design (using the 3C library protocol for a small number of cells)
	HoxA_64|mm9|chr6:52099907-52102168	HoxA_65|mm9|chr6:52102168-52102347	HoxA_66|mm9|chr6:52102347-52102627	HoxA_67|mm9|chr6:52102627-52106574	HoxA_68|mm9|chr6:52106574-52114833	HoxA_69|mm9|chr6:52114833-52118412	HoxA_70|mm9|chr6:52118412-52118617	HoxA_71|mm9|chr6:52118617-52119970	HoxA_72|mm9|chr6:52119970-52120434	HoxA_73|mm9|chr6:52120434-52121814	HoxA_74|mm9|chr6:52121814-52125015	HoxA_75|mm9|chr6:52125015-52128991	HoxA_76|mm9|chr6:52128991-52130453	HoxA_77|mm9|chr6:52130453-52137259	HoxA_78|mm9|chr6:52137259-52138976	HoxA_79|mm9|chr6:52138976-52139489	HoxA_81|mm9|chr6:52140604-52146677	HoxA_82|mm9|chr6:52146677-52147259	HoxA_85|mm9|chr6:52156546-52158195	HoxA_86|mm9|chr6:52158195-52162386	HoxA_87|mm9|chr6:52162386-52163901	HoxA_91|mm9|chr6:52166258-52172097	HoxA_92|mm9|chr6:52172097-52173708	HoxA_93|mm9|chr6:52173708-52179119	HoxA_95|mm9|chr6:52179845-52182847	HoxA_97|mm9|chr6:52188276-52189337	HoxA_99|mm9|chr6:52193142-52202193	HoxA_100|mm9|chr6:52202193-52208129	HoxA_101|mm9|chr6:52208129-52213464	HoxA_102|mm9|chr6:52213464-52215697	HoxA_103|mm9|chr6:52215697-52216109	HoxA_104|mm9|chr6:52216109-52218312	HoxA_105|mm9|chr6:52218312-52218603	HoxA_106|mm9|chr6:52218603-52232379	HoxA_107|mm9|chr6:52232379-52239458	HoxA_108|mm9|chr6:52239458-52240301	HoxA_109|mm9|chr6:52240301-52240552	HoxA_113|mm9|chr6:52244253-52247080	HoxA_114|mm9|chr6:52247080-52247369	HoxA_115|mm9|chr6:52247369-52248708	HoxA_117|mm9|chr6:52249859-52251201	HoxA_118|mm9|chr6:52251201-52260690	HoxA_119|mm9|chr6:52260690-52262318	HoxA_120|mm9|chr6:52262318-52262666	HoxA_121|mm9|chr6:52262666-52263361	HoxA_122|mm9|chr6:52263361-52265393	HoxA_123|mm9|chr6:52265393-52268866	HoxA_124|mm9|chr6:52268866-52271073	HoxA_125|mm9|chr6:52271073-52271271
HoxA_64|mm9|chr6:52099907-52102168	0	0	0	0	0	0	0	0	0	0	0	0	0	0	0	0	0	0	0	0	0	0	0	0	0	0	0	0	0	0	0.432206	0.546217	0.460708	0.232168	0.363799	0.446198	0.302648	0.573165	0.298502	0.479365	0.314049	0.89706	0.623952	0.398521	0.5571	0.900688	0.44568	0.689767	0.120748
HoxA_65|mm9|chr6:52102168-52102347	0	0	0	0	0	0	0	0	0	0	0	0	0	0	0	0	0	0	0	0	0	0	0	0	0	0	0	0	0	0	0.151842	0.488693	0.176199	0.144069	0.229577	0.353434	0.0253934	0.205738	0.161688	0.135259	0.0751437	0.335296	0.280364	0.259116	0.210402	0.20522	0.0886177	0.204183	0.208329
HoxA_66|mm9|chr6:52102347-52102627	0	0	0	0	0	0	0	0	0	0	0	0	0	0	0	0	0	0	0	0	0	0	0	0	0	0	0	0	0	0	0.365872	0.619806	0.271035	0.319231	0.298502	0.254452	0.139404	0.195374	0.0720343	0.0310939	0.105201	0.316122	0.294874	0.314567	0.353953	0.402148	0.163761	0.344624	0.261707
HoxA_67|mm9|chr6:52102627-52106574	0	0	0	0	0	0	0	0	0	0	0	0	0	0	0	0	0	0	0	0	0	0	0	0	0	0	0	0	0	0	0.475219	1.12301	0.269999	0.344106	0.402666	0.542071	0.280364	0.398002	0.21092	0.311976	0.265853	0.430651	0.427542	0.293838	0.566428	0.594412	0.285028	0.377273	0.345661
HoxA_68|mm9|chr6:52106574-52114833	0	0	0	0	0	0	0	0	0	0	0	0	0	0	0	0	0	0	0	0	0	0	0	0	0	0	0	0	0	0	0.1876	0.241496	0.324413	0.24927	0.0595967	0.224913	0.109865	0.133704	0.0699613	0.172053	0.22854	0.288137	0.380901	0.372091	0.361208	0.216621	0.181899	0.315085	0.058042
HoxA_69|mm9|chr6:52114833-52118412	0	0	0	0	0	0	0	0	0	0	0	0	0	0	0	0	0	0	0	0	0	0	0	0	0	0	0	0	0	0	0.685621	0.641571	0.440497	0.362244	0.269999	0.464336	0.162207	0.42495	0.324413	0.352916	0.340997	0.64779	0.608405	0.459154	0.61255	0.575756	0.24616	0.334778	0.339442
HoxA_70|mm9|chr6:52118412-52118617	0	0	0	0	0	0	0	0	0	0	0	0	0	0	0	0	0	0	0	0	0	0	0	0	0	0	0	0	0	0	0.386083	0.470555	0.203147	0.183454	0.160652	0.381419	0.199519	0.112456	0.15547	0.260671	0.155988	0.23735	0.288137	0.22284	0.382974	0.287101	0.103128	0.541034	0.252897
HoxA_71|mm9|chr6:52118617-52119970	0	0	0	0	0	0	0	0	0	0	0	0	0	0	0	0	0	0	0	0	0	0	0	0	0	0	0	0	0	0	0.563318	1.14581	0.472628	0.352398	0.571092	0.528597	0.313012	0.287101	0.226986	0.280882	0.266371	0.610478	0.435833	0.450344	0.675257	0.636907	0.273627	0.273627	0.472628
HoxA_72|mm9|chr6:52119970-52120434	0	0	0	0	0	0	0	0	0	0	0	0	0	0	0	0	0	0	0	0	0	0	0	0	0	0	0	0	0	0	0.345661	0.53067	0.336333	0.234759	0.420286	0.561764	0.126967	0.241496	0.195892	0.194855	0.201074	0.349807	0.33426	0.388156	0.553472	0.354471	0.256007	0.227504	0.208329
HoxA_73|mm9|chr6:52120434-52121814	0	0	0	0	0	0	0	0	0	0	0	0	0	0	0	0	0	0	0	0	0	0	0	0	0	0	0	0	0	0	0.491802	1.21785	0.266371	0.191746	0.430651	0.554508	0.268963	0.396966	0.233204	0.250306	0.162725	0.449307	0.577311	0.396966	0.626543	0.466927	0.347734	0.447234	0.282955
HoxA_74|mm9|chr6:52121814-52125015	0	0	0	0	0	0	0	0	0	0	0	0	0	0	0	0	0	0	0	0	0	0	0	0	0	0	0	0	0	0	0.599595	0.690285	0.340997	0.36639	0.209884	0.441534	0.228022	0.513568	0.350843	0.479883	0.272072	0.510977	0.780976	0.53067	0.588712	0.954584	0.367945	0.635871	0.14355
HoxA_75|mm9|chr6:52125015-52128991	0	0	0	0	0	0	0	0	0	0	0	0	0	0	0	0	0	0	0	0	0	0	0	0	0	0	0	0	0	0	0.494394	0.575756	0.244087	0.247197	0.157543	0.256007	0.13785	0.278809	0.0948365	0.141996	0.216621	0.287619	0.652973	0.342551	0.433242	0.907943	0.165316	0.300056	0.0792895
HoxA_76|mm9|chr6:52128991-52130453	0	0	0	0	0	0	0	0	0	0	0	0	0	0	0	0	0	0	0	0	0	0	0	0	0	0	0	0	0	0	0.658673	0.524451	0.350325	0.317158	0.17879	0.377273	0.215066	0.421841	0.150806	0.332705	0.303684	0.567464	0.697022	0.391265	0.573683	0.797559	0.216103	0.372091	0.0202111
HoxA_77|mm9|chr6:52130453-52137259	0	0	0	0	0	0	0	0	0	0	0	0	0	0	0	0	0	0	0	0	0	0	0	0	0	0	0	0	0	0	0.601149	0.374164	0.313012	0.406294	0.109865	0.268963	0.269999	0.457081	0.33996	0.317158	0.384528	0.402148	0.508386	0.446716	0.466409	0.488693	0.22854	0.405258	0.212475
HoxA_78|mm9|chr6:52137259-52138976	0	0	0	0	0	0	0	0	0	0	0	0	0	0	0	0	0	0	0	0	0	0	0	0	0	0	0	0	0	0	0.621879	0.67422	0.367427	0.471073	0.341515	0.467964	0.183454	0.406812	0.291765	0.444125	0.282437	0.386601	0.861302	0.363281	0.396448	0.673184	0.295392	0.355507	0.167907
HoxA_79|mm9|chr6:52138976-52139489	0	0	0	0	0	0	0	0	0	0	0	0	0	0	0	0	0	0	0	0	0	0	0	0	0	0	0	0	0	0	0.714124	0.831244	0.372609	0.217658	0.549326	0.515641	0.289174	0.280882	0.193819	0.364317	0.248751	0.542589	0.311458	0.235277	0.417177	0.370536	0.195892	0.4633	0.376237
HoxA_81|mm9|chr6:52140604-52146677	0	0	0	0	0	0	0	0	0	0	0	0	0	0	0	0	0	0	0	0	0	0	0	0	0	0	0	0	0	0	0.644163	0.94111	0.576792	0.317676	0.358098	0.5571	0.251861	0.291765	0.293838	0.515641	0.484029	0.712569	0.595967	0.524451	0.471591	0.840054	0.334778	0.482474	0.431169
HoxA_82|mm9|chr6:52146677-52147259	0	0	0	0	0	0	0	0	0	0	0	0	0	0	0	0	0	0	0	0	0	0	0	0	0	0	0	0	0	0	0.581457	0.700132	0.232686	0.356544	0.236832	0.491284	0.299538	0.549844	0.177235	0.299538	0.370018	0.516677	0.649345	0.719306	0.587157	1.11783	0.223358	0.420805	0.114011
HoxA_85|mm9|chr6:52156546-52158195	0	0	0	0	0	0	0	0	0	0	0	0	0	0	0	0	0	0	0	0	0	0	0	0	0	0	0	0	0	0	0.379864	0.742627	0.299538	0.314049	0.626543	0.402148	0.26689	0.417695	0.185527	0.246679	0.184491	0.682512	0.501131	0.364835	0.545698	0.516677	0.465373	0.447234	0.216103
HoxA_86|mm9|chr6:52158195-52162386	0	0	0	0	0	0	0	0	0	0	0	0	0	0	0	0	0	0	0	0	0	0	0	0	0	0	0	0	0	0	0.58042	0.767502	0.262744	0.233723	0.387638	0.245124	0.240978	0.336333	0.295911	2.4502	0.358098	0.53948	0.495948	0.376755	0.492839	0.689249	0.156506	0.297465	0.115566
HoxA_87|mm9|chr6:52162386-52163901	0	0	0	0	0	0	0	0	0	0	0	0	0	0	0	0	0	0	0	0	0	0	0	0	0	0	0	0	0	0	0.599076	1.35829	0.493875	0.326486	0.599595	0.303684	0.199519	0.489729	0.367427	0.394375	0.160652	0.408367	0.566428	0.384528	0.357062	0.538961	0.319749	0.296429	0.439979
HoxA_91|mm9|chr6:52166258-52172097	0	0	0	0	0	0	0	0	0	0	0	0	0	0	0	0	0	0	0	0	0	0	0	0	0	0	0	0	0	0	0.679921	0.622397	0.604777	0.197446	0.0948365	0.405258	0.173608	0.657118	0.395411	0.501131	0.439461	0.662819	0.585084	0.386601	0.579902	0.789268	0.293319	0.414586	0.12593
HoxA_92|mm9|chr6:52172097-52173708	0	0	0	0	0	0	0	0	0	0	0	0	0	0	0	0	0	0	0	0	0	0	0	0	0	0	0	0	0	0	0.609441	0.684066	0.349288	0.306275	0.301093	0.489211	0.236314	0.890323	0.234241	0.589748	0.43376	0.669556	1.21422	0.556581	0.462263	0.80326	0.294874	0.678366	0.248233
HoxA_93|mm9|chr6:52173708-52179119	0	0	0	0	0	0	0	0	0	0	0	0	0	0	0	0	0	0	0	0	0	0	0	0	0	0	0	0	0	0	0.815697	1.279	0.627579	0.338406	0.807924	0.413549	0.243569	0.420805	0.238387	0.273108	0.273627	0.757137	0.540516	0.561245	0.74159	0.724489	0.432724	0.604259	0.379864
HoxA_95|mm9|chr6:52179845-52182847	0	0	0	0	0	0	0	0	0	0	0	0	0	0	0	0	0	0	0	0	0	0	0	0	0	0	0	0	0	0	0.880995	1.82366	0.41044	0.319231	0.737444	0.842127	0.338924	0.345661	0.364835	0.434279	0.427023	0.586121	0.591303	0.618769	0.548808	0.643644	0.476255	0.509422	0.662301
HoxA_97|mm9|chr6:52188276-52189337	0	0	0	0	0	0	0	0	0	0	0	0	0	0	0	0	0	0	0	0	0	0	0	0	0	0	0	0	0	0	0.949401	2.44554	0.641571	0.677329	0.783049	0.754028	0.503203	0.630689	0.223876	0.548808	0.291765	0.582493	0.778903	0.437388	0.673184	0.80896	0.619806	0.665928	0.401112
HoxA_99|mm9|chr6:52193142-52202193	0	0	0	0	0	0	0	0	0	0	0	0	0	0	0	0	0	0	0	0	0	0	0	0	0	0	0	0	0	0	0.828653	1.50857	0.652454	0.403185	0.537407	0.485584	0.217658	0.402148	0.316122	0.461227	0.393856	0.805851	0.748327	0.353434	0.637944	0.470037	0.231132	0.414586	0.264817
HoxA_100|mm9|chr6:52202193-52208129	0	0	0	0	0	0	0	0	0	0	0	0	0	0	0	0	0	0	0	0	0	0	0	0	0	0	0	0	0	0	2.3989	1.81692	1.9216	1.0857	0.379864	0.988269	0.463818	1.16291	0.680957	0.738481	0.981532	1.18831	1.37953	0.743663	0.862338	1.32253	0.403185	0.652973	0.142514
HoxA_101|mm9|chr6:52208129-52213464	0	0	0	0	0	0	0	0	0	0	0	0	0	0	0	0	0	0	0	0	0	0	0	0	0	0	0	0	0	0	2.33204	2.22633	1.54278	1.18209	0.537407	0.886177	0.312494	0.737963	0.492321	0.83539	0.722934	0.899133	1.0147	0.566946	0.99086	0.890323	0.374682	0.917789	0.197446
HoxA_102|mm9|chr6:52213464-52215697	0	0	0	0	0	0	0	0	0	0	0	0	0	0	0	0	0	0	0	0	0	0	0	0	0	0	0	0	0	0	3.14204	3.20423	2.74456	0.858192	0.526006	0.92919	0.550363	0.993969	0.696504	0.968058	0.80015	1.066	1.14737	0.64779	0.954584	1.17535	0.504758	0.703241	0.362244
HoxA_103|mm9|chr6:52215697-52216109	0.432206	0.151842	0.365872	0.475219	0.1876	0.685621	0.386083	0.563318	0.345661	0.491802	0.599595	0.494394	0.658673	0.601149	0.621879	0.714124	0.644163	0.581457	0.379864	0.58042	0.599076	0.679921	0.609441	0.815697	0.880995	0.949401	0.828653	2.3989	2.33204	3.14204	0	0	0	0	0	0	0	0	0	0	0	0	0	0	0	0	0	0	0
HoxA_104|mm9|chr6:52216109-52218312	0.546217	0.488693	0.619806	1.12301	0.241496	0.641571	0.470555	1.14581	0.53067	1.21785	0.690285	0.575756	0.524451	0.374164	0.67422	0.831244	0.94111	0.700132	0.742627	0.767502	1.35829	0.622397	0.684066	1.279	1.82366	2.44554	1.50857	1.81692	2.22633	3.20423	0	0	0	0	0	0	0	0	0	0	0	0	0	0	0	0	0	0	0
HoxA_105|mm9|chr6:52218312-52218603	0.460708	0.176199	0.271035	0.269999	0.324413	0.440497	0.203147	0.472628	0.336333	0.266371	0.340997	0.244087	0.350325	0.313012	0.367427	0.372609	0.576792	0.232686	0.299538	0.262744	0.493875	0.604777	0.349288	0.627579	0.41044	0.641571	0.652454	1.9216	1.54278	2.74456	0	0	0	0	0	0	0	0	0	0	0	0	0	0	0	0	0	0	0
HoxA_106|mm9|chr6:52218603-52232379	0.232168	0.144069	0.319231	0.344106	0.24927	0.362244	0.183454	0.352398	0.234759	0.191746	0.36639	0.247197	0.317158	0.406294	0.471073	0.217658	0.317676	0.356544	0.314049	0.233723	0.326486	0.197446	0.306275	0.338406	0.319231	0.677329	0.403185	1.0857	1.18209	0.858192	0	0	0	0	0	0	0	0	0	0	0	0	0	0	0	0	0	0	0
HoxA_107|mm9|chr6:52232379-52239458	0.363799	0.229577	0.298502	0.402666	0.0595967	0.269999	0.160652	0.571092	0.420286	0.430651	0.209884	0.157543	0.17879	0.109865	0.341515	0.549326	0.358098	0.236832	0.626543	0.387638	0.599595	0.0948365	0.301093	0.807924	0.737444	0.783049	0.537407	0.379864	0.537407	0.526006	0	0	0	0	0	0	0	0	0	0	0	0	0	0	0	0	0	0	0
HoxA_108|mm9|chr6:52239458-52240301	0.446198	0.353434	0.254452	0.542071	0.224913	0.464336	0.381419	0.528597	0.561764	0.554508	0.441534	0.256007	0.377273	0.268963	0.467964	0.515641	0.5571	0.491284	0.402148	0.245124	0.303684	0.405258	0.489211	0.413549	0.842127	0.754028	0.485584	0.988269	0.886177	0.92919	0	0	0	0	0	0	0	0	0	0	0	0	0	0	0	0	0	0	0
HoxA_109|mm9|chr6:52240301-52240552	0.302648	0.0253934	0.139404	0.280364	0.109865	0.162207	0.199519	0.313012	0.126967	0.268963	0.228022	0.13785	0.215066	0.269999	0.183454	0.289174	0.251861	0.299538	0.26689	0.240978	0.199519	0.173608	0.236314	0.243569	0.338924	0.503203	0.217658	0.463818	0.312494	0.550363	0	0	0	0	0	0	0	0	0	0	0	0	0	0	0	0	0	0	0
HoxA_113|mm9|chr6:52244253-52247080	0.573165	0.205738	0.195374	0.398002	0.133704	0.42495	0.112456	0.287101	0.241496	0.396966	0.513568	0.278809	0.421841	0.457081	0.406812	0.280882	0.291765	0.549844	0.417695	0.336333	0.489729	0.657118	0.890323	0.420805	0.345661	0.630689	0.402148	1.16291	0.737963	0.993969	0	0	0	0	0	0	0	0	0	0	0	0	0	0	0	0	0	0	0
HoxA_114|mm9|chr6:52247080-52247369	0.298502	0.161688	0.0720343	0.21092	0.0699613	0.324413	0.15547	0.226986	0.195892	0.233204	0.350843	0.0948365	0.150806	0.33996	0.291765	0.193819	0.293838	0.177235	0.185527	0.295911	0.367427	0.395411	0.234241	0.238387	0.364835	0.223876	0.316122	0.680957	0.492321	0.696504	0	0	0	0	0	0	0	0	0	0	0	0	0	0	0	0	0	0	0
HoxA_115|mm9|chr6:52247369-52248708	0.479365	0.135259	0.0310939	0.311976	0.172053	0.352916	0.260671	0.280882	0.194855	0.250306	0.479883	0.141996	0.332705	0.317158	0.444125	0.364317	0.515641	0.299538	0.246679	2.4502	0.394375	0.501131	0.589748	0.273108	0.434279	0.548808	0.461227	0.738481	0.83539	0.968058	0	0	0	0	0	0	0	0	0	0	0	0	0	0	0	0	0	0	0
HoxA_117|mm9|chr6:52249859-52251201	0.314049	0.0751437	0.105201	0.265853	0.22854	0.340997	0.155988	0.266371	0.201074	0.162725	0.272072	0.216621	0.303684	0.384528	0.282437	0.248751	0.484029	0.370018	0.184491	0.358098	0.160652	0.439461	0.43376	0.273627	0.427023	0.291765	0.393856	0.981532	0.722934	0.80015	0	0	0	0	0	0	0	0	0	0	0	0	0	0	0	0	0	0	0
HoxA_118|mm9|chr6:52251201-52260690	0.89706	0.335296	0.316122	0.430651	0.288137	0.64779	0.23735	0.610478	0.349807	0.449307	0.510977	0.287619	0.567464	0.402148	0.386601	0.542589	0.712569	0.516677	0.682512	0.53948	0.408367	0.662819	0.669556	0.757137	0.586121	0.582493	0.805851	1.18831	0.899133	1.066	0	0	0	0	0	0	0	0	0	0	0	0	0	0	0	0	0	0	0
HoxA_119|mm9|chr6:52260690-52262318	0.623952	0.280364	0.294874	0.427542	0.380901	0.608405	0.288137	0.435833	0.33426	0.577311	0.780976	0.652973	0.697022	0.508386	0.861302	0.311458	0.595967	0.649345	0.501131	0.495948	0.566428	0.585084	1.21422	0.540516	0.591303	0.778903	0.748327	1.37953	1.0147	1.14737	0	0	0	0	0	0	0	0	0	0	0	0	0	0	0	0	0	0	0
HoxA_120|mm9|chr6:52262318-52262666	0.398521	0.259116	0.314567	0.293838	0.372091	0.459154	0.22284	0.450344	0.388156	0.396966	0.53067	0.342551	0.391265	0.446716	0.363281	0.235277	0.524451	0.719306	0.364835	0.376755	0.384528	0.386601	0.556581	0.561245	0.618769	0.437388	0.353434	0.743663	0.566946	0.64779	0	0	0	0	0	0	0	0	0	0	0	0	0	0	0	0	0	0	0
HoxA_121|mm9|chr6:52262666-52263361	0.5571	0.210402	0.353953	0.566428	0.361208	0.61255	0.382974	0.675257	0.553472	0.626543	0.588712	0.433242	0.573683	0.466409	0.396448	0.417177	0.471591	0.587157	0.545698	0.492839	0.357062	0.579902	0.462263	0.74159	0.548808	0.673184	0.637944	0.862338	0.99086	0.954584	0	0	0	0	0	0	0	0	0	0	0	0	0	0	0	0	0	0	0
HoxA_122|mm9|chr6:52263361-52265393	0.900688	0.20522	0.402148	0.594412	0.216621	0.575756	0.287101	0.636907	0.354471	0.466927	0.954584	0.907943	0.797559	0.488693	0.673184	0.370536	0.840054	1.11783	0.516677	0.689249	0.538961	0.789268	0.80326	0.724489	0.643644	0.80896	0.470037	1.32253	0.890323	1.17535	0	0	0	0	0	0	0	0	0	0	0	0	0	0	0	0	0	0	0
HoxA_123|mm9|chr6:52265393-52268866	0.44568	0.0886177	0.163761	0.285028	0.181899	0.24616	0.103128	0.273627	0.256007	0.347734	0.367945	0.165316	0.216103	0.22854	0.295392	0.195892	0.334778	0.223358	0.465373	0.156506	0.319749	0.293319	0.294874	0.432724	0.476255	0.619806	0.231132	0.403185	0.374682	0.504758	0	0	0	0	0	0	0	0	0	0	0	0	0	0	0	0	0	0	0
HoxA_124|mm9|chr6:52268866-52271073	0.689767	0.204183	0.344624	0.377273	0.315085	0.334778	0.541034	0.273627	0.227504	0.447234	0.635871	0.300056	0.372091	0.405258	0.355507	0.4633	0.482474	0.420805	0.447234	0.297465	0.296429	0.414586	0.678366	0.604259	0.509422	0.665928	0.414586	0.652973	0.917789	0.703241	0	0	0	0	0	0	0	0	0	0	0	0	0	0	0	0	0	0	0
HoxA_125|mm9|chr6:52271073-52271271	0.120748	0.208329	0.261707	0.345661	0.058042	0.339442	0.252897	0.472628	0.208329	0.282955	0.14355	0.0792895	0.0202111	0.212475	0.167907	0.376237	0.431169	0.114011	0.216103	0.115566	0.439979	0.12593	0.248233	0.379864	0.662301	0.401112	0.264817	0.142514	0.197446	0.362244	0	0	0	0	0	0	0	0	0	0	0	0	0	0	0	0	0	0	0
HoxA_126|mm9|chr6:52271271-52272007	0.5628	0.230613	0.233204	0.537407	0.271035	0.458117	0.167389	0.578865	0.297465	0.649345	0.675775	0.240978	0.612032	0.463818	0.380382	0.395411	0.460708	0.553472	0.359653	0.304202	0.438943	0.73278	0.617733	0.45449	0.683548	0.657118	0.686139	1.00796	0.988269	0.730189	0	0	0	0	0	0	0	0	0	0	0	0	0	0	0	0	0	0	0
HoxA_127|mm9|chr6:52272007-52273662	0.648827	0.267408	0.199519	0.486102	0.238905	0.342551	0.319231	0.617215	0.171017	0.427542	0.640535	0.40733	0.500094	0.36069	0.379864	0.518232	0.346179	0.542071	0.329596	0.626543	0.544662	0.398521	0.399039	0.431169	0.522378	0.626543	0.38401	1.07326	0.701686	0.664892	0	0	0	0	0	0	0	0	0	0	0	0	0	0	0	0	0	0	0
HoxA_129|mm9|chr6:52273751-52279265	0.169462	0.119193	0.0466409	0.15547	0.0896542	0.201074	0.0932818	0.242533	0.117639	0.128003	0.195892	0.310421	0.187082	0.22284	0.128522	0.142514	0.214548	0.0995006	0.0694431	0.135777	0.154951	0.154951	0.41614	0.128003	0.292801	0.116602	0.295911	0.502167	0.346179	0.348252	0	0	0	0	0	0	0	0	0	0	0	0	0	0	0	0	0	0	0
HoxA_130|mm9|chr6:52279265-52282632	0.412513	0.0880995	0.159616	0.209366	0.058042	0.145105	0.106238	0.196928	0.0943183	0.140441	0.284509	0.0637426	0.175162	0.209366	0.195892	0.013474	0.107274	0.176199	0.155988	0.144069	0.113493	0.284509	0.265853	0.285546	0.182418	0.337887	0.16998	0.434797	0.27259	0.491802	0	0	0	0	0	0	0	0	0	0	0	0	0	0	0	0	0	0	0
HoxA_133|mm9|chr6:52301128-52303118	0.129558	0.0466409	0.071516	0.170498	0.0466409	0.0746254	0.0191746	0.167389	0.109865	0.115566	0.100537	0.0606332	0.107274	0.12023	0.0989823	0.118157	0.112456	0.0829171	0.143032	0.150806	0.154433	0.153915	0.0564873	0.252897	0.0829171	0.188118	0.109347	0.319231	0.333223	0.320267	0	0	0	0	0	0	0	0	0	0	0	0	0	0	0	0	0	0	0
HoxA_137|mm9|chr6:52313112-52316057	0.24616	0.0559691	0.0279845	0.12904	0.0694431	0.16998	0.135259	0.234241	0.0901724	0.251343	0.295392	0.0912089	0.251861	0.288137	0.141996	0.145105	0.221285	0.183454	0.215066	0.121266	0.102092	0.168944	0.420286	0.216103	0.26689	0.161688	0.264817	0.503722	0.323895	0.30783	0	0	0	0	0	0	0	0	0	0	0	0	0	0	0	0	0	0	0
HoxA_139|mm9|chr6:52316168-52332467	0.095873	0.0186564	0.0352398	0.179308	0.0212475	0.103128	0.0601149	0.147696	0.146141	0.295392	0.0979459	0.0938	0.0689249	0.106238	0.0191746	0.234241	0.175162	0.0663337	0.217658	0.103128	0.144069	0.0704796	0.0730707	0.215585	0.237869	0.213512	0.109865	0.107792	0.136813	0.100537	0	0	0	0	0	0	0	0	0	0	0	0	0	0	0	0	0	0	0
HoxA_142|mm9|chr6:52334697-52337309	0.103128	0.0518232	0.128003	0.0860265	0.0772166	0.120748	0.022284	0.0896542	0.0435315	0.0699613	0.073589	0.0544144	0.116602	0.132149	0	0.139923	0.0798078	0.177754	0.174644	0.101574	0.109347	0.109865	0.215066	0.144069	0.195374	0.204183	0.210402	0.210402	0.123857	0.12904	0	0	0	0	0	0	0	0	0	0	0	0	0	0	0	0	0	0	0
HoxA_143|mm9|chr6:52337309-52345436	0.0818807	0.0233204	0.0927636	0.0995006	0.121266	0.108311	0.0367945	0.0922453	0.0678884	0.0336851	0.232686	0.0523415	0.180345	0.246679	0.145623	0.0787713	0.203147	0.159097	0.117639	0.14355	0.224913	0.187082	0.131631	0.204702	0.0585602	0.0813625	0.0404221	0.261189	0.107274	0.163243	0	0	0	0	0	0	0	0	0	0	0	0	0	0	0	0	0	0	0
HoxA_146|mm9|chr6:52349868-52361783	0.131113	0.051305	0.0331669	0.0393856	0.0476774	0.133186	0.0901724	0.130076	0.0171017	0.172571	0.106756	0.0388674	0.179827	0.0186564	0.109347	0.0259116	0.116602	0.158579	0.0202111	0.0704796	0.064779	0.196928	0.0616696	0.0938	0.261707	0.0720343	0.153915	0.313012	0.179308	0.233723	0	0	0	0	0	0	0	0	0	0	0	0	0	0	0	0	0	0	0
HoxA_147|mm9|chr6:52361783-52364459	0.0875812	0.00103646	0.0248751	0.104683	0.0419768	0.121266	0.0818807	0.0233204	0.0450862	0.121785	0.291246	0.121785	0.126967	0.0720343	0.158061	0.107792	0.0228022	0.108311	0.0906906	0.145105	0.0689249	0.0798078	0.118157	0.0901724	0.100537	0.211439	0.100019	0.252379	0.124376	0.280882	0	0	0	0	0	0	0	0	0	0	0	0	0	0	0	0	0	0	0
HoxA_148|mm9|chr6:52364459-52367178	0.0751437	0.0196928	0.00466409	0.10261	0	0.0761801	0.0590785	0.0342033	0.102092	0.0860265	0.0564873	0.0435315	0.0585602	0.15236	0.0212475	0.042495	0.0176199	0.0186564	0.0678884	0.0414586	0.0601149	0.0435315	0.0414586	0.109865	0.138886	0.0725525	0.0766984	0.282955	0	0.0585602	0	0	0	0	0	0	0	0	0	0	0	0	0	0	0	0	0	0	0
HoxA_149|mm9|chr6:52367178-52369809	0.279845	0.0595967	0.066852	0.159097	0.0518232	0.217658	0.0601149	0.105201	0.0466409	0.192782	0.0849901	0.111938	0.192264	0.105719	0.0621879	0.173608	0.0549326	0.0632243	0.153915	0.0943183	0.200556	0.100019	0.200556	0.235277	0.166353	0.132667	0.0891359	0.0720343	0.133186	0.151324	0	0	0	0	0	0	0	0	0	0	0	0	0	0	0	0	0	0	0
HoxA_150|mm9|chr6:52369809-52372052	0.0399039	0.0891359	0.0471591	0.0409403	0.0228022	0.0725525	0.0176199	0.0564873	0.0248751	0.0741072	0.0570055	0.0621879	0	0.0554508	0.103128	0.206256	0.0886177	0.073589	0.0450862	0.0642608	0.0891359	0.0751437	0.139923	0.147696	0.0481956	0.157543	0.0202111	0.232686	0.142514	0.0637426	0	0	0	0	0	0	0	0	0	0	0	0	0	0	0	0	0	0	0
HoxA_151|mm9|chr6:52372052-52381044	0.133186	0.0196928	0.0694431	0.0310939	0.101574	0.106238	0.022284	0.0901724	0.0507868	0.0880995	0.0419768	0.0191746	0.140959	0.0984641	0.0689249	0.112975	0.242533	0.0948365	0.141996	0.179827	0.168425	0.251861	0.179827	0.121266	0.172053	0.183454	0.221803	0.27259	0.163243	0.201074	0	0	0	0	0	0	0	0	0	0	0	0	0	0	0	0	0	0	0
HoxA_153|mm9|chr6:52381133-52383492	0.226467	0.0466409	0.0347216	0.0507868	0.071516	0.138886	0.0233204	0.107274	0.126449	0.0834354	0.116084	0.12023	0.136295	0.13785	0.0627061	0.0228022	0.0927636	0.191228	0.0932818	0.116084	0.163243	0.233204	0.306793	0.183454	0.154433	0.128003	0.106238	0.184491	0.339442	0.212475	0	0	0	0	0	0	0	0	0	0	0	0	0	0	0	0	0	0	0
HoxA_154|mm9|chr6:52383492-52387391	0.154433	0	0.0414586	0.0165834	0.0202111	0.0777348	0.0228022	0.0741072	0.0399039	0.0316122	0.0694431	0.121785	0.0419768	0.0709978	0.0139923	0.0440497	0.140441	0.0818807	0.137332	0.0906906	0.0383492	0.0295392	0.0404221	0.000518232	0.133186	0.0642608	0.221803	0.123339	0.219212	0.103128	0	0	0	0	0	0	0	0	0	0	0	0	0	0	0	0	0	0	0
HoxA_155|mm9|chr6:52387391-52392264	0.197965	0.105719	0	0.0865448	0.0430133	0.051305	0.0207293	0.0181381	0.0378309	0.0995006	0.0642608	0.101574	0.0253934	0.183454	0.0217658	0	0.0834354	0.0989823	0.131113	0.0492321	0.0730707	0.0741072	0.172053	0.0720343	0.140959	0.133186	0.0844718	0.26378	0.192264	0.175681	0	0	0	0	0	0	0	0	0	0	0	0	0	0	0	0	0	0	0
HoxA_156|mm9|chr6:52392264-52401093	0.0891359	0.0139923	0.0642608	0.157024	0.0948365	0.123339	0.0202111	0.177235	0.0362763	0.0834354	0.0974277	0.064779	0.0228022	0.087063	0.0326486	0.0766984	0.0813625	0.0279845	0.0466409	0.0741072	0.191746	0.0243569	0.0974277	0.244606	0.0969094	0.242533	0.220767	0.0616696	0.0891359	0.147696	0	0	0	0	0	0	0	0	0	0	0	0	0	0	0	0	0	0	0
HoxA_157|mm9|chr6:52401093-52402200	0.183972	0.0264298	0.0678884	0.042495	0.0689249	0.0233204	0.0233204	0.0709978	0.0787713	0.042495	0.150287	0.0492321	0.102092	0.183972	0.128003	0.042495	0.015547	0.105719	0.0559691	0.0829171	0.0378309	0.0678884	0.212993	0.0616696	0.0969094	0.0440497	0.0875812	0.195892	0.0953547	0.136295	0	0	0	0	0	0	0	0	0	0	0	0	0	0	0	0	0	0	0
HoxA_158|mm9|chr6:52402200-52407151	0.0414586	0.00932818	0.0435315	0.0497503	0.000518232	0.0264298	0	0.0124376	0.0347216	0.042495	0.0409403	0.0253934	0.0119193	0.0300575	0.0269481	0.000518232	0.0373127	0.0694431	0.0673702	0.00777348	0.0129558	0.0176199	0.0352398	0.029021	0.0212475	0.0932818	0.00725525	0.105719	0.058042	0.0798078	0	0	0	0	0	0	0	0	0	0	0	0	0	0	0	0	0	0	0
HoxA_161|mm9|chr6:52415131-52419678	0.180863	0.0466409	0.0150287	0.073589	0.0393856	0.0741072	0.0269481	0.22284	0.087063	0.0518232	0.0228022	0.112975	0.16117	0.0741072	0.0228022	0.115048	0.0989823	0.0709978	0.138368	0.073589	0.127485	0.0995006	0.0839536	0.260153	0.122821	0.175162	0.0404221	0.175162	0.0849901	0.101574	0	0	0	0	0	0	0	0	0	0	0	0	0	0	0	0	0	0	0
HoxA_163|mm9|chr6:52420006-52429375	0.140959	0.0435315	0.0632243	0.0875812	0.104683	0.0808442	0.0461227	0.0549326	0.0678884	0.111938	0.0948365	0.0627061	0.232168	0.159097	0.0461227	0.0549326	0.0471591	0.0549326	0.182418	0.109865	0.0279845	0.150287	0.0963912	0.173608	0.182418	0.162725	0.0766984	0.236314	0.149251	0.163243	0	0	0	0	0	0	0	0	0	0	0	0	0	0	0	0	0	0	0
HoxA_165|mm9|chr6:52438705-52440652	0	0	0	0.0264298	0	0.0616696	0.0248751	0.0834354	0.0419768	0.00207293	0.044568	0.0207293	0.0430133	0.0518232	0.0393856	0.0160652	0	0.0554508	0	0.071516	0	0.0772166	0.0839536	0	0.0590785	0.0694431	0.0709978	0.0886177	0.0471591	0.141996	0	0	0	0	0	0	0	0	0	0	0	0	0	0	0	0	0	0	0
HoxA_167|mm9|chr6:52441759-52444151	0.149769	0.0621879	0.105719	0.0979459	0.0601149	0.139923	0.0367945	0.0440497	0.0917271	0.116602	0.0440497	0.0823989	0.104165	0.0694431	0.0207293	0.12023	0.0979459	0.176717	0.0393856	0.0860265	0.183972	0.164798	0.180345	0.160134	0.095873	0.120748	0.167907	0.367427	0.0912089	0.221285	0	0	0	0	0	0	0	0	0	0	0	0	0	0	0	0	0	0	0
HoxA_168|mm9|chr6:52444151-52448361	0.035758	0	0.080326	0.172571	0.0347216	0.242533	0.0896542	0.198483	0.0181381	0.106238	0.139923	0.0176199	0.015547	0.0466409	0.132667	0.122821	0.0813625	0.0274663	0.208848	0.0502685	0.184491	0.0430133	0.144587	0.14666	0.184491	0.0912089	0.0720343	0.193301	0.0865448	0.211439	0	0	0	0	0	0	0	0	0	0	0	0	0	0	0	0	0	0	0
HoxA_169|mm9|chr6:52448361-52449991	0.190191	0.0538961	0.0269481	0.0658155	0.0207293	0.0725525	0	0.0818807	0.116084	0.0818807	0.0995006	0.0103646	0.216621	0.0196928	0.126967	0.0906906	0.0606332	0.0948365	0.0865448	0.080326	0.0196928	0.0969094	0.161688	0.0927636	0.0367945	0.193301	0.134222	0.329596	0.12904	0.294874	0	0	0	0	0	0	0	0	0	0	0	0	0	0	0	0	0	0	0
HoxA_171|mm9|chr6:52450036-52462044	0.120748	0.000518232	0.0606332	0.0601149	0	0.172571	0.035758	0.187082	0.0746254	0.178272	0.0953547	0.184491	0.153397	0.058042	0.0549326	0.14666	0.0233204	0.0621879	0.110383	0.123339	0.0865448	0.0228022	0.126449	0.131631	0.192782	0.148214	0.181899	0.0658155	0.100019	0.110383	0	0	0	0	0	0	0	0	0	0	0	0	0	0	0	0	0	0	0
HoxA_173|mm9|chr6:52464987-52470467	0.154951	0.134222	0.0362763	0.241496	0.0367945	0.12023	0.149251	0.183454	0.0450862	0.0756619	0.0388674	0	0.116084	0.0248751	0.0704796	0.0502685	0.058042	0.0761801	0.124894	0.0336851	0.119193	0.0399039	0.0326486	0.267408	0.151842	0.160652	0.080326	0.163761	0.0176199	0.044568	0	0	0	0	0	0	0	0	0	0	0	0	0	0	0	0	0	0	0
HoxA_174|mm9|chr6:52470467-52478865	0.135777	0.0559691	0.0673702	0.0704796	0.0538961	0.0927636	0.0202111	0.144587	0.015547	0.0378309	0.148733	0.0611514	0.015547	0.0538961	0.0777348	0.136813	0.0606332	0	0.0279845	0.0383492	0.0989823	0.0699613	0.212993	0.125412	0.123339	0.163243	0.0865448	0.158061	0.163761	0.128522	0	0	0	0	0	0	0	0	0	0	0	0	0	0	0	0	0	0	0
HoxA_176|mm9|chr6:52483388-52490414	0.118675	0	0.0186564	0.112975	0.0367945	0.0855083	0.0176199	0.199001	0.0139923	0.216621	0.11142	0.0730707	0.0704796	0.0181381	0.202629	0.0279845	0.0430133	0.0792895	0.11142	0.0751437	0.058042	0.145105	0.0658155	0.0704796	0.144069	0.114529	0.0331669	0.242533	0.256525	0.11712	0	0	0	0	0	0	0	0	0	0	0	0	0	0	0	0	0	0	0
HoxA_177|mm9|chr6:52490414-52493874	0.16428	0.115566	0.0912089	0.183972	0.0663337	0.109347	0.0792895	0.0554508	0.121785	0.0782531	0.163761	0.0912089	0.115048	0.135777	0.103128	0.166871	0.109865	0.0725525	0.0922453	0.181899	0.114011	0.268444	0.209366	0.188118	0.189155	0.264817	0.131113	0.351361	0.135259	0.362763	0	0	0	0	0	0	0	0	0	0	0	0	0	0	0	0	0	0	0
HoxA_178|mm9|chr6:52493874-52497394	0.103128	0.165834	0.107274	0.165834	0	0.137332	0.103646	0.120748	0.207293	0.0808442	0.126967	0.0652973	0.0595967	0.110902	0.0839536	0.139404	0.190191	0.0523415	0.124894	0.123339	0.237869	0.0606332	0.104165	0.228022	0.201074	0.253416	0.177754	0.0875812	0.172571	0.167389	0	0	0	0	0	0	0	0	0	0	0	0	0	0	0	0	0	0	0
HoxA_179|mm9|chr6:52497394-52497615	0.0383492	0.0191746	0	0.0544144	0.0238387	0.0829171	0.0259116	0.0746254	0.0383492	0.132149	0.0196928	0.0165834	0.0243569	0.0549326	0.035758	0.118675	0.0191746	0	0.0616696	0.0601149	0	0.0943183	0.0259116	0.0373127	0.0725525	0.071516	0.112975	0.128522	0.0191746	0.0792895	0	0	0	0	0	0	0	0	0	0	0	0	0	0	0	0	0	0	0
HoxA_180|mm9|chr6:52497615-52497933	0.102092	0	0	0.0228022	0	0.773202	0.0228022	0.0378309	0.058042	0	0.0901724	0.0196928	0.0409403	0.0409403	0.0528597	0.0228022	0.0274663	0.0373127	0.0652973	0.022284	0	0.101574	0.116084	0.0440497	0.0248751	0.0730707	0.0202111	0.120748	0.151842	0.0860265	0	0	0	0	0	0	0	0	0	0	0	0	0	0	0	0	0	0	0
HoxA_181|mm9|chr6:52497933-52501912	0.108311	0.0523415	0.0689249	0.232168	0.0233204	0.122303	0.107274	0.132149	0.0570055	0.115566	0.182936	0.0248751	0.0471591	0.015547	0.087063	0.211439	0.184491	0.0181381	0	0.251861	0.107274	0.0228022	0.0860265	0.202111	0.208329	0.225431	0.140441	0.0938	0.0855083	0.149769	0	0	0	0	0	0	0	0	0	0	0	0	0	0	0	0	0	0	0
HoxA_182|mm9|chr6:52501912-52506069	0.131113	0.0404221	0.0777348	0.0849901	0.0238387	0.0896542	0.0279845	0.16998	0.0616696	0.0191746	0.163243	0.0373127	0	0	0.0217658	0.0948365	0.044568	0.0601149	0.211439	0.0456044	0.15547	0.0362763	0.0844718	0.226986	0.0181381	0.241496	0.0720343	0.0233204	0.0595967	0.139404	0	0	0	0	0	0	0	0	0	0	0	0	0	0	0	0	0	0	0
HoxA_185|mm9|chr6:52509879-52510899	0.14355	0.0544144	0.0202111	0.115566	0	0.0865448	0.0310939	0.101055	0.0383492	0.101574	0.156506	0.0202111	0.132149	0.0917271	0.0829171	0.0336851	0.0756619	0.0741072	0.19641	0.132667	0.0844718	0.120748	0.159097	0.0564873	0.0202111	0.212475	0.0927636	0.228022	0.206256	0.278809	0	0	0	0	0	0	0	0	0	0	0	0	0	0	0	0	0	0	0
HoxA_187|mm9|chr6:52514325-52518961	0.104683	0.0150287	0.0238387	0.178272	0.0761801	0.0725525	0.0658155	0.0575238	0.0684066	0.235277	0.0181381	0.0570055	0.0409403	0.0658155	0.0901724	0.105719	0.13785	0.143032	0.0766984	0.147696	0.14666	0.115048	0.150806	0.197446	0.247197	0.256525	0.15547	0.193301	0.179308	0.131631	0	0	0	0	0	0	0	0	0	0	0	0	0	0	0	0	0	0	0
HoxA_189|mm9|chr6:52520631-52522484	0.348252	0.0217658	0.0461227	0.135259	0.139923	0.165834	0.0316122	0.109347	0.0751437	0.203147	0.206775	0.163761	0.200556	0.274145	0.178272	0.142514	0.206775	0.0932818	0.0927636	0.270517	0.230095	0.260671	0.235796	0.168944	0.185527	0.142514	0.169462	0.481956	0.591821	0.32545	0	0	0	0	0	0	0	0	0	0	0	0	0	0	0	0	0	0	0
HoxA_191|mm9|chr6:52522985-52524187	0.148733	0.0855083	0.138886	0.204183	0.0627061	0.132667	0.114011	0.223358	0.115566	0.17879	0.133704	0.0782531	0.154951	0.119712	0.149769	0.157543	0.168944	0.0637426	0.24046	0.159616	0.148733	0.1876	0.16428	0.151324	0.200038	0.1876	0.268963	0.338406	0.217658	0.489211	0	0	0	0	0	0	0	0	0	0	0	0	0	0	0	0	0	0	0
HoxA_194|mm9|chr6:52527037-52527403	0.161688	0.0595967	0.071516	0.273108	0.0279845	0.172571	0.11142	0.298502	0.0906906	0.12593	0.155988	0.127485	0.121266	0.087063	0.131631	0.126449	0.0896542	0.0912089	0.158579	0.134222	0.195374	0.0792895	0.0570055	0.34877	0.157024	0.218176	0.129558	0.322859	0.293319	0.482474	0	0	0	0	0	0	0	0	0	0	0	0	0	0	0	0	0	0	0
HoxA_195|mm9|chr6:52527403-52527763	0.113493	0.0238387	0.104165	0.108311	0.0367945	0.0456044	0.0720343	0.108829	0.0585602	0.179308	0.0518232	0.128003	0.0730707	0.0228022	0.141996	0.218176	0.0191746	0.0497503	0.066852	0.0906906	0.13474	0.0331669	0.0274663	0.112456	0.238387	0.186045	0.224913	0.229577	0.229059	0.228022	0	0	0	0	0	0	0	0	0	0	0	0	0	0	0	0	0	0	0
HoxA_196|mm9|chr6:52527763-52541897	0.154433	0.0694431	0.285028	0.283473	0.115566	0.0953547	0.231132	0.202111	0.0554508	0.13474	0.104683	0.148733	0.226467	0.0595967	0.103646	0.133186	0.109865	0.187082	0.141996	0.163243	0.281918	0.130595	0.177235	0.25497	0.405776	0.43687	0.272072	0.292283	0.250306	0.301093	0	0	0	0	0	0	0	0	0	0	0	0	0	0	0	0	0	0	0
HoxA_197|mm9|chr6:52541897-52542057	0.0160652	0.0181381	0.015547	0.0751437	0.022284	0	0.0238387	0.0528597	0.0015547	0.125412	0.051305	0.0383492	0.0378309	0.0217658	0	0.000518232	0.0419768	0	0.0150287	0.0575238	0.0352398	0	0.035758	0.186564	0.0145105	0.148214	0.0373127	0.11712	0.0321304	0.122303	0	0	0	0	0	0	0	0	0	0	0	0	0	0	0	0	0	0	0
HoxA_198|mm9|chr6:52542057-52542687	0.174126	0.0450862	0.115566	0.100537	0.080326	0.0813625	0.000518232	0.130595	0.0450862	0.0901724	0.157024	0.190709	0.122821	0.251861	0.0751437	0.0777348	0.13474	0.141996	0.0886177	0.170498	0.0481956	0.0917271	0.296947	0.132667	0.117639	0.229059	0.158579	0.520305	0.302648	0.342551	0	0	0	0	0	0	0	0	0	0	0	0	0	0	0	0	0	0	0
HoxA_199|mm9|chr6:52542687-52542962	0.0414586	0.0404221	0	0.0471591	0.0414586	0.058042	0.0378309	0.0404221	0.00725525	0.013474	0.0419768	0.0233204	0	0	0.0823989	0.100019	0.0160652	0.0471591	0.0217658	0.0191746	0.0621879	0.0191746	0.073589	0	0.0523415	0.0450862	0.0792895	0.0196928	0.195892	0	0	0	0	0	0	0	0	0	0	0	0	0	0	0	0	0	0	0	0
HoxA_201|mm9|chr6:52545386-52551985	0.0523415	0.0502685	0.022284	0.0202111	0.0129558	0.0886177	0.0378309	0.0487138	0.0471591	0.0559691	0.0570055	0.0549326	0.0248751	0	0.0554508	0.0243569	0.107792	0.103128	0.0238387	0	0.0751437	0.0886177	0.0507868	0.0616696	0.044568	0.133704	0.0865448	0.252379	0.0917271	0.123339	0	0	0	0	0	0	0	0	0	0	0	0	0	0	0	0	0	0	0
HoxA_202|mm9|chr6:52551985-52562232	0.0844718	0.0196928	0.095873	0.0948365	0.0191746	0.080326	0.164798	0.281918	0.12023	0.147178	0.102092	0.095873	0.104683	0.0388674	0.0901724	0.0844718	0.112975	0.114011	0.0875812	0.121785	0.22854	0.0808442	0.223358	0.181381	0.229059	0.331669	0.199001	0.269999	0.244087	0.282955	0	0	0	0	0	0	0	0	0	0	0	0	0	0	0	0	0	0	0
HoxA_203|mm9|chr6:52562232-52568056	0.0518232	0.110383	0.0450862	0.0917271	0.12593	0.106756	0.0678884	0.135259	0.0497503	0.22284	0.188637	0.066852	0.172571	0.0632243	0.0725525	0.0932818	0.0922453	0.136813	0.0943183	0.042495	0.1876	0.131631	0.114011	0.114529	0.247197	0.204183	0.217139	0.302648	0.455008	0.126967	0	0	0	0	0	0	0	0	0	0	0	0	0	0	0	0	0	0	0
HoxA_206|mm9|chr6:52575680-52581530	0.134222	0.0321304	0.00984641	0.196928	0	0.109347	0.0274663	0.155988	0.104683	0.158579	0.118157	0.0875812	0.0808442	0.0145105	0.162725	0.187082	0.0331669	0.0559691	0.0321304	0.108829	0.0963912	0.109347	0.165834	0.206256	0.214548	0.381419	0.328041	0.29021	0.130076	0.365872	0	0	0	0	0	0	0	0	0	0	0	0	0	0	0	0	0	0	0
HoxA_208|mm9|chr6:52582510-52584015	0.307312	0.0777348	0.0388674	0.0316122	0.0590785	0.0404221	0	0.0461227	0.109865	0.157024	0.195892	0.0191746	0.177754	0.171535	0.0912089	0.0181381	0.12593	0.0611514	0.0367945	0.116084	0.0761801	0.144069	0.286064	0.0917271	0.220249	0.274145	0.124894	0.613069	0.261189	0.202629	0	0	0	0	0	0	0	0	0	0	0	0	0	0	0	0	0	0	0
HoxA_210|mm9|chr6:52584025-52588283	0.120748	0.124376	0.0139923	0.227504	0.0709978	0.0839536	0.12593	0.324413	0.0979459	0.174644	0.17309	0.0538961	0.129558	0.0637426	0.0191746	0.0844718	0.0886177	0.0787713	0.103128	0.0632243	0.0974277	0.0922453	0.162207	0.203665	0.175162	0.212475	0.0844718	0.218694	0.234241	0.0595967	0	0	0	0	0	0	0	0	0	0	0	0	0	0	0	0	0	0	0
HoxA_211|mm9|chr6:52588283-52590517	0.25808	0.103646	0.0627061	0.144069	0.122303	0.146141	0.0202111	0.159616	0.0378309	0.126449	0.289174	0.122821	0.160134	0.11712	0.172053	0.114529	0.231132	0.123339	0.159616	0.0409403	0.163761	0.207811	0.279845	0.206775	0.151842	0.162725	0.157024	0.390229	0.302129	0.233204	0	0	0	0	0	0	0	0	0	0	0	0	0	0	0	0	0	0	0
HoxA_221|mm9|chr6:52627105-52628031	0.142514	0.044568	0.0440497	0.0849901	0.0150287	0.0606332	0.0196928	0.0523415	0.0409403	0.119193	0.154951	0.0461227	0.0865448	0.0984641	0.0414586	0.0621879	0.0409403	0.080326	0.160652	0.0601149	0.147178	0.132149	0.120748	0	0.193819	0.0627061	0.132149	0.180863	0.145623	0.151324	0	0	0	0	0	0	0	0	0	0	0	0	0	0	0	0	0	0	0
HoxA_225|mm9|chr6:52637837-52641317	0.0938	0.0673702	0.0191746	0	0.0414586	0.102092	0.0658155	0.116084	0.0901724	0.0741072	0.112456	0.0849901	0.0829171	0.0564873	0.106238	0.0409403	0.159616	0.0948365	0.156506	0.0476774	0.0777348	0.0450862	0.130595	0.127485	0.165316	0.126449	0.195892	0.270517	0.178272	0.192782	0	0	0	0	0	0	0	0	0	0	0	0	0	0	0	0	0	0	0
HoxA_226|mm9|chr6:52641318-52647573	0.0502685	0.022284	0.0995006	0.0393856	0.0953547	0.132667	0.0658155	0.0808442	0.0202111	0.0621879	0.194855	0.0922453	0.253934	0.105201	0.276218	0.101574	0.176717	0.0917271	0.192782	0.14355	0.144587	0.25497	0.25808	0.0823989	0.128522	0.107274	0.234759	0.385565	0.15547	0.265335	0	0	0	0	0	0	0	0	0	0	0	0	0	0	0	0	0	0	0
HoxA_228|mm9|chr6:52656263-52657321	0.0233204	0.0388674	0.13474	0.189155	0.0684066	0.0989823	0.035758	0.136295	0.214548	0.0689249	0.0932818	0.13474	0.0564873	0.0627061	0.131631	0.146141	0.165834	0.0139923	0.0606332	0.158579	0.0813625	0.0849901	0.0787713	0.165834	0.181899	0.217658	0.118675	0.229059	0.206256	0.192782	0	0	0	0	0	0	0	0	0	0	0	0	0	0	0	0	0	0	0
HoxA_229|mm9|chr6:52657322-52658513	0.058042	0.0440497	0.0782531	0.132667	0	0.0782531	0.0684066	0.154951	0.00621879	0.148733	0.154433	0.0533779	0.0725525	0.0430133	0.126449	0.124894	0.126967	0.0606332	0.0891359	0.0798078	0.118157	0.0741072	0.0430133	0.21092	0.224913	0.0621879	0.204183	0.162725	0.0518232	0.10261	0	0	0	0	0	0	0	0	0	0	0	0	0	0	0	0	0	0	0
HoxA_235|mm9|chr6:52693850-52694645	0.526006	0.0787713	0.0435315	0.10261	0	0.188637	0	0.166871	0.0367945	0.176717	0.295392	0.0844718	0.221803	0.183454	0.105719	0.0383492	0.0932818	0.13474	0.174644	0.0730707	0.042495	0.136295	0.26689	0.0751437	0.199001	0.259634	0.123339	0.274145	0.360171	0.356026	0	0	0	0	0	0	0	0	0	0	0	0	0	0	0	0	0	0	0
HoxA_237|mm9|chr6:52669639-52701839	0.0176199	0.0642608	0.0466409	0.0362763	0.0435315	0.0367945	0	0.0756619	0.0103646	0	0.177754	0.000518232	0.0658155	0.150806	0.0575238	0.064779	0.107792	0.0912089	0.0699613	0.0632243	0.0373127	0.0720343	0.0979459	0.0906906	0.0632243	0.107792	0.0217658	0.245124	0.257561	0.235796	0	0	0	0	0	0	0	0	0	0	0	0	0	0	0	0	0	0	0
HoxA_238|mm9|chr6:52701840-52704692	0.201592	0.177754	0.0461227	0.121266	0.0378309	0.261189	0.0207293	0.111938	0.0518232	0.138886	0.142514	0.128522	0.0834354	0.0564873	0.118675	0.106756	0.109347	0.0243569	0.0487138	0.154433	0.0658155	0.134222	0.066852	0.0606332	0.239942	0.176199	0.163761	0.372609	0.208329	0.191228	0	0	0	0	0	0	0	0	0	0	0	0	0	0	0	0	0	0	0
HoxA_239|mm9|chr6:52704693-52706024	0.042495	0.0492321	0.0756619	0.21403	0.101574	0.132149	0.0652973	0.0855083	0.0559691	0.163243	0.0342033	0.0487138	0.0725525	0.0264298	0.0430133	0.0699613	0.0507868	0.118675	0.139923	0.155988	0.087063	0.128522	0.161688	0.051305	0.157543	0.21403	0.195892	0.226467	0.153397	0.022284	0	0	0	0	0	0	0	0	0	0	0	0	0	0	0	0	0	0	0
HoxA_240|mm9|chr6:52706025-52718534	0.0808442	0.0559691	0	0.0642608	0.0160652	0.115566	0.120748	0.0818807	0.0865448	0.157543	0.0730707	0.0979459	0.0362763	0.058042	0.100019	0.0165834	0.058042	0.0808442	0.0533779	0.0979459	0.0772166	0.116084	0.147696	0.192782	0.14355	0.250824	0.141996	0.148214	0.206256	0.21403	0	0	0	0	0	0	0	0	0	0	0	0	0	0	0	0	0	0	0
HoxA_241|mm9|chr6:52718535-52721479	0.0373127	0.0202111	0.0564873	0.0730707	0.035758	0.0704796	0	0.119712	0.0652973	0.0922453	0.0772166	0.0487138	0.115566	0.0549326	0.0953547	0.0844718	0.0285028	0.0709978	0.118157	0.0570055	0.0554508	0.0880995	0.172571	0.0953547	0.131631	0.129558	0.116084	0.171535	0.126967	0.17309	0	0	0	0	0	0	0	0	0	0	0	0	0	0	0	0	0	0	0
HoxA_243|mm9|chr6:52723090-52725748	0.102092	0.0694431	0.112456	0.149769	0.0730707	0.122303	0.0487138	0.203665	0.0632243	0.0544144	0.105201	0.0497503	0.105201	0.0823989	0.0782531	0.0544144	0.087063	0.0456044	0.157543	0.105201	0.126449	0.104165	0.121266	0.140441	0.174126	0.150287	0.0704796	0.245124	0.160652	0.0440497	0	0	0	0	0	0	0	0	0	0	0	0	0	0	0	0	0	0	0
HoxA_248|mm9|chr6:52741675-52742100	0	0	0	0.171017	0	0.0212475	0	0.087063	0.0171017	0.0616696	0.022284	0.0393856	0.0336851	0.125412	0.0326486	0.0761801	0.0808442	0.0310939	0.0984641	0.116084	0.042495	0.0476774	0.0196928	0.194337	0.108829	0.138886	0.158579	0.105719	0.0518232	0.0388674	0	0	0	0	0	0	0	0	0	0	0	0	0	0	0	0	0	0	0
HoxA_249|mm9|chr6:52742101-52748549	0.180345	0.0538961	0.0150287	0.042495	0.0570055	0.145105	0	0.0720343	0.073589	0.087063	0.0761801	0.0663337	0.210402	0.124376	0.0404221	0.0544144	0.136295	0.0497503	0.192264	0.0756619	0.051305	0.133704	0.101055	0.0414586	0.179308	0.0844718	0.13474	0.377791	0.186564	0.267408	0	0	0	0	0	0	0	0	0	0	0	0	0	0	0	0	0	0	0
HoxA_251|mm9|chr6:52748770-52752905	0.0694431	0.0362763	0.0554508	0.0694431	0.0699613	0.013474	0.0564873	0.132667	0.0471591	0.156506	0.160652	0.0399039	0.0518232	0.0891359	0.0834354	0.0953547	0.0538961	0.11142	0.0684066	0.103128	0.136813	0.223876	0.238387	0.101574	0.114529	0.210402	0.211957	0.276736	0.160134	0.217139	0	0	0	0	0	0	0	0	0	0	0	0	0	0	0	0	0	0	0
HoxA_255|mm9|chr6:52759240-52771163	0.0823989	0.0875812	0.0875812	0.12904	0.0823989	0.154951	0.0471591	0.217658	0.0829171	0.26689	0.0564873	0.0860265	0	0.0487138	0.17879	0.124376	0.0751437	0.0404221	0.176199	0.145623	0.146141	0	0.0196928	0.306275	0.136813	0.269999	0.16117	0.0471591	0.0585602	0.0829171	0	0	0	0	0	0	0	0	0	0	0	0	0	0	0	0	0	0	0
HoxA_256|mm9|chr6:52771164-52772646	0.138368	0.0704796	0.103646	0.138886	0.0362763	0.0969094	0.0150287	0.103128	0.125412	0.134222	0.163761	0.145105	0.112456	0.111938	0.104683	0.0984641	0.0938	0.106756	0.0922453	0.044568	0.0896542	0.0699613	0.110383	0.112975	0.0523415	0.192264	0.109865	0.455526	0.19641	0.2814	0	0	0	0	0	0	0	0	0	0	0	0	0	0	0	0	0	0	0
HoxA_257|mm9|chr6:52772647-52777261	0.12904	0.0492321	0.0632243	0.0938	0.0601149	0.12023	0.0538961	0.0886177	0.0119193	0.11712	0.274663	0.0554508	0.192782	0.151842	0.116602	0.0922453	0.243051	0.121266	0.114011	0.166353	0.194337	0.183972	0.259634	0.1876	0.188637	0.3695	0.127485	0.607886	0.347734	0.340479	0	0	0	0	0	0	0	0	0	0	0	0	0	0	0	0	0	0	0
HoxA_258|mm9|chr6:52777262-52778607	0.204183	0.0860265	0.0233204	0.224395	0.0943183	0.0829171	0.13785	0.154433	0.172571	0.166353	0.136295	0.128003	0.161688	0.0792895	0.11142	0.0720343	0.128003	0.259634	0.071516	0.206775	0.218176	0.0808442	0.232168	0.206775	0.301611	0.291765	0.277254	0.603222	0.344106	0.221803	0	0	0	0	0	0	0	0	0	0	0	0	0	0	0	0	0	0	0
HoxA_262|mm9|chr6:52793374-52801167	0.0880995	0.102092	0.105201	0.139404	0.0399039	0.1876	0.178272	0.168425	0.178272	0.140441	0.0720343	0.103646	0.0461227	0.123339	0.130595	0.16117	0.12023	0.0844718	0.179308	0.211957	0.17309	0.161688	0.051305	0.177754	0.142514	0.250824	0.246679	0.286064	0.353434	0.10261	0	0	0	0	0	0	0	0	0	0	0	0	0	0	0	0	0	0	0
HoxA_263|mm9|chr6:52801169-52803285	0.101055	0.0305757	0.0673702	0.139404	0.115048	0.125412	0	0.0342033	0.145105	0.203147	0.0404221	0.123339	0.21403	0.073589	0.127485	0.195892	0.17309	0.146141	0.171017	0.263262	0.149769	0.166353	0.198483	0.252379	0.220249	0.167389	0.209884	0.569537	0.407849	0.310421	0	0	0	0	0	0	0	0	0	0	0	0	0	0	0	0	0	0	0
HoxA_264|mm9|chr6:52803286-52809464	0.148214	0.000518232	0.16998	0.149251	0.0621879	0.123339	0.0202111	0.149769	0.0673702	0.24046	0.171535	0.100537	0.0974277	0.0948365	0.138368	0.126449	0.1876	0.108311	0.182418	0.0886177	0.167907	0.189673	0.194855	0.223876	0.234759	0.251861	0.200038	0.258598	0.291765	0.137332	0	0	0	0	0	0	0	0	0	0	0	0	0	0	0	0	0	0	0
HoxA_265|mm9|chr6:52809465-52817061	0	0.0523415	0.0336851	0.148214	0	0.151842	0.0642608	0.204702	0.0233204	0.167389	0.0761801	0.0393856	0.015547	0.0606332	0.0352398	0.119193	0.185527	0.0476774	0.223876	0.157024	0.242533	0.0461227	0.044568	0.0886177	0.202629	0.174126	0.104683	0.0217658	0.0751437	0.257043	0	0	0	0	0	0	0	0	0	0	0	0	0	0	0	0	0	0	0
HoxA_267|mm9|chr6:52817090-52817285	0.0450862	0	0.0259116	0.0632243	0.148214	0.0585602	0.00362763	0.122303	0	0.044568	0.0564873	0.0440497	0.0435315	0.0652973	0.0456044	0.0171017	0.0663337	0.0751437	0.0595967	0.0419768	0.0575238	0.0652973	0	0.0627061	0.0709978	0.0642608	0.0399039	0.0891359	0.0196928	0.103646	0	0	0	0	0	0	0	0	0	0	0	0	0	0	0	0	0	0	0
HoxA_268|mm9|chr6:52817286-52820895	0.11712	0.0575238	0.0601149	0.0388674	0.0798078	0.133186	0.0699613	0.0627061	0.064779	0.0694431	0.112456	0.115048	0.110383	0.100537	0.0823989	0.156506	0.0709978	0.0699613	0.108829	0.175162	0.103128	0.122303	0.196928	0.186045	0.154951	0.19641	0.122821	0.276218	0.267408	0.265335	0	0	0	0	0	0	0	0	0	0	0	0	0	0	0	0	0	0	0
HoxA_269|mm9|chr6:52820896-52831247	0.21403	0	0.0481956	0.154433	0.0772166	0.152878	0	0.154951	0	0.135777	0.0901724	0.0409403	0.100019	0.0782531	0.114011	0.0704796	0.0860265	0.236832	0.183972	0.073589	0.0564873	0.180863	0.16998	0.0974277	0.12023	0.138886	0.187082	0.417695	0.21973	0.271035	0	0	0	0	0	0	0	0	0	0	0	0	0	0	0	0	0	0	0
HoxA_270|mm9|chr6:52831248-52832456	0.0948365	0.0813625	0.0730707	0.0383492	0	0.150287	0.126967	0.0570055	0.0829171	0.112456	0.087063	0.0823989	0.232686	0.0953547	0.0388674	0.124894	0.0886177	0.179827	0.131113	0.145623	0.168425	0.109865	0.14355	0.100019	0.066852	0.202629	0.195892	0.259634	0.14355	0.241496	0	0	0	0	0	0	0	0	0	0	0	0	0	0	0	0	0	0	0
HoxA_272|mm9|chr6:52832471-52841533	0.129558	0	0.0523415	0.058042	0	0.140441	0.0932818	0.198483	0.0932818	0.14666	0.058042	0.0663337	0.0891359	0.0787713	0.0860265	0.0419768	0.176199	0.125412	0.0352398	0.149769	0.165316	0.0652973	0.0160652	0.105719	0.170498	0.267926	0.208848	0.148214	0.156506	0.0730707	0	0	0	0	0	0	0	0	0	0	0	0	0	0	0	0	0	0	0
HoxA_273|mm9|chr6:52841534-52842038	0.167389	0.0310939	0.0782531	0.0912089	0.0466409	0.168425	0.0300575	0.0352398	0.0595967	0.0590785	0.16998	0.0544144	0.0440497	0.130076	0.0202111	0.0725525	0.0855083	0.100537	0.131113	0.103646	0.0979459	0.136295	0.138886	0.102092	0.0554508	0.199519	0.0782531	0.286582	0.205738	0.175681	0	0	0	0	0	0	0	0	0	0	0	0	0	0	0	0	0	0	0
HoxA_274|mm9|chr6:52842039-52843690	0.035758	0.0264298	0.0984641	0.221803	0.0456044	0.0538961	0.087063	0.268963	0.162725	0.189155	0.0544144	0.19641	0.0217658	0.0678884	0.135777	0.080326	0.180345	0.0652973	0.20522	0.0855083	0.182418	0.0559691	0.112975	0.269481	0.1876	0.431687	0.356026	0.110383	0.0777348	0.277254	0	0	0	0	0	0	0	0	0	0	0	0	0	0	0	0	0	0	0
HoxA_277|mm9|chr6:52848364-52850692	0.327523	0.0269481	0.0388674	0.0766984	0.109347	0.145105	0.0673702	0.108311	0.140441	0.0466409	0.187082	0.0855083	0.0896542	0.0901724	0.174126	0.115048	0.101574	0.315085	0.125412	0.0829171	0.0212475	0.203147	0.242533	0.135259	0.172053	0.242014	0.128003	0.500612	0.255488	0.31664	0	0	0	0	0	0	0	0	0	0	0	0	0	0	0	0	0	0	0
HoxA_278|mm9|chr6:52850693-52851731	0.0829171	0.0637426	0.0419768	0.0953547	0.0228022	0.0570055	0	0.156506	0.0663337	0.140959	0	0.0746254	0.0326486	0	0.0611514	0.163243	0.0808442	0.0658155	0.108829	0.165316	0.208329	0.0212475	0.0927636	0.175681	0.0430133	0.352398	0.110383	0.170498	0.105201	0.176199	0	0	0	0	0	0	0	0	0	0	0	0	0	0	0	0	0	0	0
HoxA_280|mm9|chr6:52858040-52858605	0.171017	0.0367945	0.0621879	0.109865	0.087063	0.168425	0.071516	0.115566	0.0124376	0.0585602	0.080326	0.0652973	0.122303	0.0943183	0.133186	0.0756619	0.103646	0.110383	0.153397	0.0823989	0.177235	0.216103	0.135259	0.0906906	0.183454	0.11712	0.197965	0.358617	0.353953	0.344106	0	0	0	0	0	0	0	0	0	0	0	0	0	0	0	0	0	0	0
HoxA_281|mm9|chr6:52858606-52865393	0.0673702	0.0678884	0.119193	0.219212	0.0300575	0.104683	0.0642608	0.186045	0.160134	0.259116	0.0409403	0.101055	0.0253934	0.0233204	0.131113	0.11712	0.0347216	0.0202111	0.176199	0.0995006	0.287619	0.0295392	0.124376	0.232168	0.342551	0.171017	0.126449	0.27259	0.140441	0.0746254	0	0	0	0	0	0	0	0	0	0	0	0	0	0	0	0	0	0	0
HoxA_284|mm9|chr6:52871142-52873703	0.289174	0.0238387	0.0627061	0.279327	0.101055	0.0627061	0.0746254	0.188637	0.14666	0.0751437	0.15236	0.139404	0.139923	0.116602	0.146141	0.0238387	0.182418	0.239942	0.0974277	0.139404	0.193301	0.133704	0.157024	0.11712	0.216621	0.171535	0.206256	0.555027	0.451898	0.294874	0	0	0	0	0	0	0	0	0	0	0	0	0	0	0	0	0	0	0
HoxA_285|mm9|chr6:52873704-52878849	0.066852	0.0414586	0.0160652	0.013474	0.0264298	0.0378309	0.00777348	0.0751437	0.0310939	0.0259116	0.0756619	0	0.0621879	0.0658155	0	0.0440497	0.0336851	0.0139923	0.00103646	0.0176199	0.0124376	0.0699613	0.0808442	0.0233204	0.0761801	0.0756619	0.0114011	0.114011	0.0564873	0.0658155	0	0	0	0	0	0	0	0	0	0	0	0	0	0	0	0	0	0	0
HoxA_286|mm9|chr6:52878850-52881665	0.460708	0.0217658	0.0466409	0.171017	0.0943183	0.176717	0.0259116	0.0523415	0.132149	0.22854	0.153397	0.110383	0.095873	0.21403	0.105201	0.23165	0.12023	0.0181381	0.101055	0.250824	0.071516	0.148214	0.168425	0.174644	0.188118	0.191746	0.0787713	0.388156	0.23165	0.271035	0	0	0	0	0	0	0	0	0	0	0	0	0	0	0	0	0	0	0
HoxA_287|mm9|chr6:52881666-52885980	0.125412	0.0865448	0.0419768	0.0373127	0.00880995	0.10261	0.0461227	0.0766984	0.139404	0.0886177	0.0186564	0.0720343	0.126967	0.0171017	0.190709	0.105719	0.0440497	0.0419768	0.0886177	0.0590785	0.0720343	0.103128	0.117639	0.15547	0.292801	0.167389	0.0673702	0.423914	0.140959	0.192782	0	0	0	0	0	0	0	0	0	0	0	0	0	0	0	0	0	0	0
HoxA_288|mm9|chr6:52885981-52888326	0.0756619	0.0165834	0.0606332	0.0746254	0	0.029021	0.0367945	0.0404221	0.0435315	0.00880995	0.0404221	0.0196928	0.0575238	0.0228022	0.0678884	0.110383	0.0481956	0.0202111	0.0207293	0.0616696	0.130076	0.0518232	0.0906906	0.110383	0.0906906	0.0917271	0.217139	0.385047	0.0741072	0.107274	0	0	0	0	0	0	0	0	0	0	0	0	0	0	0	0	0	0	0
HoxA_289|mm9|chr6:52888327-52890013	0.0564873	0.0865448	0.0347216	0.101055	0.0264298	0.122303	0.0684066	0.141477	0.0202111	0.0741072	0.116602	0.0393856	0.0741072	0.0538961	0.0818807	0.183972	0.132667	0.0792895	0.124376	0.13474	0.0938	0.168944	0.103646	0.111938	0.0611514	0.145105	0.153397	0.317676	0.135777	0.17309	0	0	0	0	0	0	0	0	0	0	0	0	0	0	0	0	0	0	0
HoxA_290|mm9|chr6:52890014-52897320	0.051305	0.0481956	0.0310939	0.182936	0.0264298	0.0627061	0.0399039	0.0922453	0.0896542	0.168944	0.0595967	0.058042	0.0538961	0.0844718	0.151842	0.140959	0.104165	0.0606332	0.0746254	0.139923	0.389711	0.0538961	0.112456	0.230095	0.1876	0.259116	0.134222	0.104683	0.113493	0.138368	0	0	0	0	0	0	0	0	0	0	0	0	0	0	0	0	0	0	0
HoxA_291|mm9|chr6:52897321-52911313	0.23735	0.000518232	0.035758	0.0523415	0.165316	0.0616696	0.0886177	0.0466409	0.0388674	0.071516	0.147178	0.042495	0.0917271	0.175162	0.101055	0.161688	0.064779	0.0855083	0.121785	0.11142	0.015547	0.0787713	0.167907	0.225949	0.0777348	0.109865	0.231132	0.319231	0.13785	0.29021	0	0	0	0	0	0	0	0	0	0	0	0	0	0	0	0	0	0	0
HoxA_292|mm9|chr6:52911314-52914397	0.0637426	0.0300575	0.0938	0.0798078	0.0207293	0.0595967	0.0238387	0.194337	0.123857	0.217139	0.11712	0.0549326	0.0559691	0.0207293	0.202111	0.0782531	0.0217658	0.0362763	0.0637426	0.0782531	0.106238	0.13474	0.0746254	0.0829171	0.183454	0.160134	0.181899	0.353953	0.17879	0.154433	0	0	0	0	0	0	0	0	0	0	0	0	0	0	0	0	0	0	0
HoxA_293|mm9|chr6:52914398-52918137	0.0544144	0.0435315	0.0538961	0.112975	0.0564873	0.0720343	0.0440497	0.133704	0.0171017	0.208329	0.191746	0.0834354	0.267926	0.199001	0.0409403	0.058042	0.190191	0.0844718	0.139923	0.27259	0.115048	0.150806	0.20522	0.200556	0.190191	0.211957	0.236832	0.250824	0.13785	0.191746	0	0	0	0	0	0	0	0	0	0	0	0	0	0	0	0	0	0	0
HoxA_295|mm9|chr6:52918252-52919700	0.166871	0.029021	0.0829171	0.106238	0.0165834	0.0901724	0.080326	0.0492321	0.0730707	0.121266	0.176717	0.151842	0.168425	0.163243	0.162725	0.100019	0.073589	0.202111	0.239942	0.215585	0.0989823	0.247715	0.194337	0.124894	0.170498	0.310421	0.120748	0.493875	0.22284	0.314567	0	0	0	0	0	0	0	0	0	0	0	0	0	0	0	0	0	0	0
HoxA_296|mm9|chr6:52919701-52924303	0.214548	0.0471591	0.0212475	0.16428	0.0129558	0.0741072	0.080326	0.064779	0.134222	0	0.127485	0.0538961	0.105719	0.133704	0.151324	0.0466409	0.168944	0.0906906	0.150806	0.10261	0.0756619	0.209884	0.154951	0.0699613	0.199001	0.286064	0.150806	0.262225	0.273108	0.228022	0	0	0	0	0	0	0	0	0	0	0	0	0	0	0	0	0	0	0
HoxA_297|mm9|chr6:52924304-52933041	0.110383	0.0274663	0.0269481	0.0823989	0.0435315	0.103646	0.0741072	0.152878	0.0658155	0.126967	0.0751437	0.0150287	0.0481956	0.071516	0.174126	0.114529	0.0450862	0.0570055	0.0896542	0.111938	0.0875812	0.114529	0.154433	0.12593	0.0912089	0.0974277	0.153397	0.303684	0.134222	0.305757	0	0	0	0	0	0	0	0	0	0	0	0	0	0	0	0	0	0	0
HoxA_298|mm9|chr6:52933042-52942459	0.121266	0.00673702	0.104165	0.0440497	0.0839536	0.0191746	0.0269481	0.138886	0.0766984	0.0544144	0.199519	0.0362763	0.0709978	0.0627061	0.0694431	0.058042	0.0326486	0.139923	0.0507868	0.110902	0.138886	0.174644	0.11712	0.147178	0.0595967	0.171535	0.12023	0.180345	0.105719	0.193819	0	0	0	0	0	0	0	0	0	0	0	0	0	0	0	0	0	0	0
HoxA_302|mm9|chr6:52952345-52960689	0.0440497	0.042495	0.0766984	0.0243569	0.0367945	0.0922453	0.0419768	0.0901724	0.0953547	0.0689249	0.0228022	0.035758	0.121785	0.0829171	0.0963912	0.0228022	0.0476774	0.0171017	0.0233204	0.0637426	0.0741072	0.022284	0.0383492	0.0984641	0.0559691	0.102092	0.141996	0.0730707	0.134222	0.0347216	0	0	0	0	0	0	0	0	0	0	0	0	0	0	0	0	0	0	0
HoxA_303|mm9|chr6:52960690-52967527	0.114011	0.0435315	0	0.0564873	0.0393856	0.0528597	0.0430133	0.0875812	0.0243569	0.0419768	0.0492321	0.044568	0.101574	0.131631	0.0782531	0.071516	0	0.0248751	0.0502685	0.0932818	0.0207293	0.118675	0.044568	0.0616696	0.119712	0.103128	0.0953547	0.267408	0.12023	0.206256	0	0	0	0	0	0	0	0	0	0	0	0	0	0	0	0	0	0	0
HoxA_304|mm9|chr6:52967528-52968961	0.12593	0.0015547	0.0285028	0.0321304	0.0196928	0.0399039	0.0331669	0.126967	0.0689249	0.129558	0	0.130595	0.0694431	0.0383492	0.0497503	0.11712	0.0476774	0.0559691	0.0378309	0.0906906	0.0963912	0.035758	0.0865448	0.0689249	0.130595	0.205738	0.0891359	0.124376	0.0414586	0.0616696	0	0	0	0	0	0	0	0	0	0	0	0	0	0	0	0	0	0	0
HoxA_308|mm9|chr6:52979969-52985775	0.115566	0	0	0.0844718	0	0.123857	0.0844718	0.103128	0.0953547	0.0839536	0.0689249	0.0362763	0.12023	0.0196928	0.0538961	0.0637426	0.0279845	0.0129558	0.0730707	0.0461227	0.0404221	0.163761	0.147178	0.0171017	0.143032	0.113493	0.0725525	0.109865	0.11142	0.0145105	0	0	0	0	0	0	0	0	0	0	0	0	0	0	0	0	0	0	0
HoxA_311|mm9|chr6:52990950-53001211	0.0720343	0.0202111	0.00414586	0.0829171	0	0.0860265	0.000518232	0.0839536	0.0487138	0.109865	0.116084	0.0207293	0.0150287	0	0.022284	0.0932818	0	0.0269481	0.0611514	0.0228022	0.0367945	0.0186564	0.044568	0.0217658	0.106238	0.0233204	0.0818807	0.12023	0.0497503	0.0969094	0	0	0	0	0	0	0	0	0	0	0	0	0	0	0	0	0	0	0
HoxA_316|mm9|chr6:53013811-53020160	0.0611514	0	0.0269481	0	0	0.0352398	0	0.108311	0.0497503	0.00207293	0.0171017	0.0160652	0.0207293	0.015547	0.0243569	0	0.0202111	0.0253934	0.0533779	0.044568	0.071516	0.0145105	0.0627061	0.0212475	0.0171017	0.0279845	0.0471591	0.0549326	0.0399039	0.0228022	0	0	0	0	0	0	0	0	0	0	0	0	0	0	0	0	0	0	0
HoxA_317|mm9|chr6:53020161-53021219	0.0264298	0.0196928	0.0435315	0.0362763	0.0248751	0.0694431	0	0.0823989	0	0	0	0.064779	0	0.0730707	0.0476774	0.0186564	0.0601149	0	0.0279845	0	0.118157	0.0217658	0	0.17309	0.0015547	0.0699613	0.0528597	0.0238387	0.0518232	0.0699613	0	0	0	0	0	0	0	0	0	0	0	0	0	0	0	0	0	0	0
HoxA_322|mm9|chr6:53026446-53031824	0.233204	0	0.0440497	0.0321304	0.0393856	0.0233204	0.0430133	0	0.0207293	0.0207293	0.0393856	0	0.0207293	0.042495	0.0995006	0.0228022	0.0471591	0.0601149	0	0.0601149	0.064779	0.0544144	0.0507868	0.00310939	0.0849901	0.0414586	0.115566	0.0176199	0.171017	0.095873	0	0	0	0	0	0	0	0	0	0	0	0	0	0	0	0	0	0	0
HoxA_323|mm9|chr6:53031825-53033187	0.0461227	0.0248751	0	0.015547	0.0575238	0.0367945	0.0176199	0.0176199	0.0191746	0.0456044	0.0212475	0.0373127	0.0689249	0.0471591	0.0435315	0.0938	0.0388674	0.0590785	0.0186564	0.0507868	0.0538961	0.0570055	0.162207	0.042495	0.0533779	0.119193	0.0601149	0.0927636	0.0673702	0.0906906	0	0	0	0	0	0	0	0	0	0	0	0	0	0	0	0	0	0	0
HoxA_324|mm9|chr6:53033188-53035208	0.0798078	0	0.0181381	0.0430133	0.0228022	0.0497503	0.0186564	0.0756619	0	0.0419768	0.101055	0	0.0367945	0.0191746	0.0373127	0.0238387	0.0238387	0.0456044	0.0528597	0.0844718	0	0.0388674	0.184491	0.0932818	0.0637426	0.0212475	0.0974277	0.175162	0.0611514	0.0917271	0	0	0	0	0	0	0	0	0	0	0	0	0	0	0	0	0	0	0
HoxA_325|mm9|chr6:53035209-53036923	0.0528597	0.0383492	0.0321304	0.0233204	0	0.0269481	0	0.0849901	0.0207293	0	0.0570055	0.0196928	0.0176199	0	0.071516	0.0238387	0.00621879	0.0466409	0.0792895	0.0912089	0.0782531	0.0632243	0.0393856	0	0.087063	0.0388674	0.0590785	0.144069	0.0165834	0.104165	0	0	0	0	0	0	0	0	0	0	0	0	0	0	0	0	0	0	0
HoxA_327|mm9|chr6:53039978-53044657	0	0	0.0202111	0.101055	0	0.0948365	0	0.0310939	0.0466409	0.0533779	0.0404221	0	0.073589	0.0673702	0.042495	0.0533779	0.107274	0.0212475	0.042495	0.0792895	0.0399039	0.0264298	0.000518232	0.123857	0.0233204	0.148214	0.100019	0.035758	0.12904	0.0849901	0	0	0	0	0	0	0	0	0	0	0	0	0	0	0	0	0	0	0
[truncated: 114 more columns]
