# Supplementary material for: Clustering of Tissue-Specific Sub-TADs Accompanies the Regulation of HoxA Genes in Developing Limbs
Source: PLoS Genet. 2013 Dec 26;9(12):e1004018. doi: 10.1371/journal.pgen.1004018 (PMC3873244; doi:10.1371/journal.pgen.1004018)
Supplement: Table S22 — Med12 peaks in E12.5 mouse distal limb. The start and end position of the Med12 peaks identified in mouse distal limbs at E12.5 is listed genome-wide. (XLSX) [file pgen.1004018.s030.xlsx]

## Sheet: Med12 peaks
Table S22. Med12 peaks in E12.5 mouse distal limb
	Peak position (mm9)
Chromosome (chr)	start	end
chr1	4847340	4848197
chr1	6352959	6353513
chr1	7109207	7110271
chr1	7186513	7187433
chr1	7525933	7526544
chr1	9738214	9738930
chr1	10554136	10555042
chr1	12490064	12491193
chr1	12499769	12500938
chr1	12605123	12606343
chr1	12634378	12635476
chr1	12680023	12681323
chr1	12681723	12682808
chr1	12682857	12683976
chr1	13579631	13580468
chr1	13658703	13659881
chr1	13922521	13923579
chr1	14174671	14175580
chr1	14286482	14287371
chr1	14347501	14348481
chr1	14501469	14502356
chr1	15158357	15159273
chr1	15463570	15464634
chr1	16094197	16095373
chr1	16999271	17000130
chr1	17143659	17144606
chr1	18450358	18451204
chr1	19207342	19208703
chr1	19326858	19327876
chr1	19531926	19532501
chr1	19545324	19545960
chr1	19663289	19664782
chr1	19685526	19686517
chr1	21826344	21827260
chr1	24202568	24203687
chr1	24332434	24333342
chr1	24528186	24528990
chr1	25003031	25003762
chr1	25145113	25145867
chr1	27111474	27112398
chr1	27175191	27175910
chr1	27874106	27875217
chr1	28236996	28237722
chr1	30835042	30835937
chr1	30919507	30920398
chr1	31206402	31207051
chr1	31665130	31665784
chr1	34193624	34194602
chr1	34195309	34196465
chr1	36025093	36026073
chr1	36425754	36426472
chr1	36568334	36569087
chr1	36879778	36880665
chr1	37085753	37086818
chr1	37356074	37356934
chr1	38376843	38378054
chr1	38542966	38543847
chr1	38682259	38682855
chr1	38708951	38709605
chr1	38814083	38815038
chr1	38819667	38820807
chr1	39592095	39593114
chr1	42529717	42530435
chr1	42596663	42597796
chr1	42900735	42901584
chr1	42909563	42910324
chr1	43154848	43156013
chr1	43501773	43502582
chr1	43884357	43885296
chr1	44158777	44159739
chr1	44171666	44172333
chr1	44735190	44736940
chr1	44997203	44998063
chr1	45007682	45008605
chr1	45205594	45206231
chr1	45442023	45443333
chr1	45526882	45527672
chr1	45729252	45730199
chr1	45823888	45824891
chr1	45851761	45852631
chr1	45922935	45923969
chr1	46132606	46133535
chr1	47220774	47221916
chr1	47547344	47548047
chr1	49208473	49209150
chr1	49727498	49728394
chr1	50531367	50531980
chr1	51029225	51030081
chr1	51284610	51285456
chr1	51502501	51503427
chr1	51674494	51675391
chr1	52170194	52171097
chr1	52322812	52323627
chr1	52512350	52512930
chr1	52709302	52710409
chr1	53258012	53259337
chr1	53283460	53284345
chr1	54909404	54909974
chr1	54963636	54964571
chr1	56500245	56500855
chr1	56631284	56632460
chr1	56889984	56890851
chr1	57014879	57015843
chr1	57029736	57030668
chr1	57205250	57206240
chr1	57662431	57663550
chr1	57962563	57963438
chr1	58449381	58450217
chr1	59326619	59327844
chr1	59337876	59338886
chr1	60043610	60044332
chr1	60203297	60204179
chr1	60236550	60237488
chr1	61195798	61196756
chr1	61237891	61238741
chr1	61327010	61327692
chr1	61359184	61360595
chr1	62201413	62202297
chr1	62202360	62203351
chr1	62255826	62256389
chr1	62426694	62427415
chr1	62429512	62430302
chr1	62510993	62512055
chr1	62539865	62541012
chr1	64134195	64135359
chr1	64211021	64211988
chr1	64462950	64463866
chr1	64578959	64579911
chr1	64627567	64628619
chr1	64845104	64846926
chr1	64855337	64856367
chr1	65289613	65290704
chr1	66608006	66608870
chr1	66643321	66644642
chr1	66879979	66880898
chr1	67404989	67405832
chr1	68720748	68721772
chr1	68944451	68945238
chr1	69365800	69366799
chr1	69520927	69522007
chr1	69580731	69581513
chr1	71156047	71157040
chr1	71699139	71700562
chr1	72064603	72066073
chr1	72106905	72107834
chr1	72272462	72273614
chr1	72283042	72284197
chr1	72290372	72291617
chr1	72776453	72777341
chr1	73146590	73147677
chr1	73392463	73393818
chr1	74304418	74306204
chr1	74433262	74434118
chr1	74437471	74438353
chr1	74443050	74444601
chr1	74564428	74565117
chr1	75120866	75121947
chr1	75836310	75837427
chr1	76045725	76046853
chr1	76199246	76199971
chr1	76526496	76527711
chr1	76871895	76872624
chr1	76892577	76893863
chr1	76920808	76922230
chr1	76971242	76972336
chr1	77009824	77010639
chr1	77047722	77048776
chr1	77065180	77066501
chr1	77206890	77208102
chr1	77216558	77217597
chr1	77428130	77429137
chr1	77723937	77724757
chr1	78228154	78229270
chr1	78485014	78486097
chr1	78653631	78654744
chr1	79829028	79829926
chr1	79836811	79837948
chr1	81714052	81715264
chr1	81740824	81741759
chr1	82357503	82358550
chr1	82835499	82836482
chr1	83855436	83856440
chr1	83867459	83868289
chr1	84085813	84086866
chr1	84545824	84547150
chr1	84835744	84836720
chr1	87960652	87961630
chr1	88338153	88339721
chr1	88377969	88378541
chr1	88383562	88384740
chr1	88428515	88429427
chr1	88483243	88484285
chr1	89293190	89294183
chr1	91367216	91367921
chr1	91517996	91518550
chr1	91755598	91756407
chr1	92175577	92176469
chr1	92253672	92255149
chr1	92293387	92294494
chr1	92377468	92378901
chr1	93507892	93508890
chr1	93514603	93515506
chr1	94079838	94080482
chr1	94268001	94268902
chr1	94275498	94276633
chr1	95072975	95073824
chr1	95121669	95122654
chr1	95239690	95240590
chr1	95374464	95375825
chr1	96214076	96214781
chr1	96430602	96430998
chr1	98135151	98136013
chr1	99508258	99509016
chr1	99665829	99666915
chr1	99882400	99883075
chr1	106985075	106986093
chr1	107119815	107120517
chr1	107360533	107361166
chr1	107526944	107527826
chr1	107633060	107633982
chr1	108255130	108255958
chr1	108394207	108395048
chr1	108492693	108493767
chr1	108494239	108495649
chr1	109610123	109610949
chr1	109845674	109846471
chr1	111430979	111431489
chr1	112046355	112047332
chr1	112069486	112070450
chr1	120207390	120208050
chr1	120285259	120286310
chr1	120695678	120696628
chr1	120721412	120723868
chr1	120948647	120951625
chr1	121353065	121354272
chr1	121354482	121355503
chr1	122724580	122725577
chr1	123224240	123224930
chr1	124253512	124254055
chr1	125214995	125215915
chr1	125343977	125345039
chr1	125741524	125742371
chr1	127017604	127018327
chr1	127331732	127332793
chr1	128579767	128580877
chr1	128695635	128696568
chr1	128726432	128727872
chr1	129466502	129467188
chr1	129670000	129671218
chr1	133724056	133725017
chr1	134313683	134314734
chr1	134373182	134374497
chr1	134921270	134922306
chr1	135027580	135028394
chr1	135974865	135975852
chr1	136452770	136453876
chr1	137627950	137629227
chr1	138521099	138521698
chr1	138579848	138580830
chr1	138624804	138625816
chr1	138769960	138770826
chr1	139228544	139229629
chr1	139550505	139551599
chr1	139580031	139580976
chr1	139711212	139712721
chr1	139796719	139797679
chr1	139825243	139826317
chr1	139869318	139870299
chr1	139919506	139920786
chr1	139978776	139979547
chr1	140102326	140103388
chr1	140124678	140125461
chr1	140570122	140571605
chr1	140734135	140735322
chr1	140749518	140750743
chr1	141103561	141104821
chr1	141349784	141350866
chr1	142360408	142361529
chr1	142635325	142636420
chr1	143282926	143283435
chr1	143637659	143638629
chr1	143936411	143937165
chr1	144371128	144371934
chr1	145623891	145624807
chr1	145922520	145923230
chr1	147863784	147864589
chr1	148740263	148740754
chr1	150492786	150493826
chr1	152384634	152385651
chr1	152393225	152394167
chr1	152417473	152418709
chr1	152562937	152564197
chr1	152673889	152675248
chr1	152859412	152860949
chr1	153667677	153668708
chr1	154139256	154139959
chr1	155038416	155039342
chr1	155313441	155314161
chr1	155488468	155489679
chr1	156390684	156391453
chr1	156950181	156950910
chr1	157540136	157540973
chr1	157882818	157884044
chr1	158690730	158692202
chr1	158887884	158889152
chr1	158989504	158990114
chr1	159067059	159068078
chr1	159917046	159918187
chr1	161035975	161036620
chr1	161694034	161694630
chr1	162065974	162067232
chr1	162142694	162143986
chr1	162254350	162255255
chr1	162548301	162549214
chr1	162656800	162657810
chr1	163089104	163090189
chr1	163914066	163914939
chr1	163929783	163931700
chr1	163945088	163946365
chr1	163946868	163947880
chr1	163950340	163951223
chr1	163966131	163968576
chr1	164004383	164005539
chr1	164030852	164031883
chr1	164056923	164058114
chr1	164063987	164065530
chr1	164116691	164118191
chr1	164146942	164148571
chr1	164168673	164169531
chr1	164224057	164224967
chr1	164229183	164230342
chr1	164868031	164869392
chr1	165243227	165245498
chr1	165285588	165287460
chr1	165333339	165334377
chr1	165342491	165343351
chr1	165344010	165345167
chr1	165345317	165346634
chr1	165407340	165409232
chr1	165504442	165505738
chr1	165587850	165589192
chr1	165590699	165592049
chr1	165654833	165655474
chr1	165687082	165688405
chr1	165775426	165776354
chr1	165782798	165784012
chr1	165819421	165820219
chr1	165823679	165824717
chr1	165826630	165827453
chr1	165828164	165828936
chr1	165837340	165838277
chr1	166068658	166069877
chr1	167715995	167716980
chr1	167932549	167933898
chr1	167978957	167980036
chr1	169280102	169280861
chr1	170056508	170057551
chr1	170225746	170226770
chr1	170362134	170362980
chr1	170730255	170731059
chr1	170945599	170946154
chr1	170960165	170960873
chr1	171094370	171095406
chr1	171274213	171275202
chr1	171461167	171462164
chr1	172040389	172041470
chr1	172535263	172536203
chr1	172568929	172569672
chr1	172662680	172663720
chr1	173293058	173293951
chr1	173432683	173433877
chr1	173493724	173494878
chr1	174763236	174763843
chr1	176584908	176586083
chr1	178072070	178072812
chr1	178694292	178695720
chr1	178698900	178699875
chr1	178743888	178745345
chr1	179130469	179131692
chr1	179748519	179749308
chr1	180247881	180249487
chr1	180335694	180336914
chr1	180473599	180474252
chr1	180480262	180481324
chr1	180498832	180499883
chr1	180629705	180630690
chr1	180658242	180659114
chr1	180662932	180663933
chr1	180729316	180731048
chr1	180750738	180751916
chr1	180800826	180801885
chr1	180991709	180992717
chr1	181026844	181027902
chr1	181073073	181073914
chr1	181126619	181127800
chr1	181335869	181336970
chr1	181511425	181512302
chr1	181598074	181598715
chr1	181733481	181734214
chr1	181924175	181925232
chr1	182569560	182570644
chr1	182780543	182781670
chr1	182843584	182844562
chr1	182875461	182876349
chr1	183000964	183001900
chr1	186068109	186069258
chr1	186177533	186178522
chr1	186277535	186278833
chr1	187597665	187598636
chr1	187626994	187627755
chr1	187727010	187728057
chr1	187739402	187740373
chr1	187764102	187764741
chr1	187867664	187868461
chr1	187939846	187940848
chr1	189970393	189971197
chr1	190484435	190485454
chr1	190550319	190551652
chr1	191647363	191648344
chr1	192171185	192172241
chr1	192196168	192196831
chr1	192886261	192887318
chr1	193175617	193176926
chr1	193399254	193400454
chr1	194004492	194005045
chr1	194495340	194497578
chr1	194625324	194626737
chr1	194648740	194649946
chr1	194660723	194661958
chr1	197002666	197003774
chr10	3134014	3134807
chr10	4104701	4105538
chr10	5275273	5276171
chr10	5355702	5356370
chr10	5699893	5700725
chr10	5913524	5914619
chr10	6250578	6251390
chr10	6303769	6304758
chr10	6605922	6606657
chr10	7382612	7383489
chr10	7757543	7758426
chr10	8549906	8550785
chr10	8852148	8852828
chr10	9424530	9425565
chr10	10164442	10165580
chr10	11655532	11656162
chr10	12269067	12269978
chr10	12297304	12298825
chr10	12811955	12813413
chr10	13284422	13285279
chr10	15054266	15054910
chr10	16078278	16079250
chr10	16340596	16341683
chr10	16793935	16795547
chr10	16980484	16982008
chr10	17126172	17126948
chr10	17241270	17242449
chr10	17442595	17443442
chr10	18188268	18189211
chr10	18872026	18872703
chr10	19070513	19071189
chr10	19191180	19192058
chr10	19192216	19193489
chr10	20179374	20180044
chr10	20260313	20261207
chr10	20352190	20353296
chr10	20712265	20713224
chr10	21341348	21342068
chr10	23208529	23209523
chr10	23227576	23228383
chr10	23251374	23252865
chr10	23430415	23431397
chr10	23456798	23457925
chr10	23463221	23464332
chr10	23506599	23507696
chr10	23753798	23755116
chr10	23868582	23869282
chr10	24474671	24475572
chr10	24484663	24485716
chr10	24710908	24711905
chr10	25079182	25080120
chr10	25091361	25092957
chr10	25101274	25102313
chr10	25105360	25106318
chr10	25610761	25611786
chr10	25647642	25648720
chr10	26095234	26096063
chr10	26185502	26186310
chr10	26493613	26494500
chr10	26703097	26704317
chr10	26705121	26706322
chr10	26726310	26727419
chr10	26735945	26736605
chr10	26866761	26867254
chr10	27402854	27403969
chr10	27633226	27633891
chr10	27780440	27781171
chr10	27875383	27876594
chr10	27884002	27884979
chr10	27943136	27944614
chr10	28845047	28845909
chr10	29038589	29039659
chr10	29302300	29303194
chr10	29498393	29499475
chr10	30047441	30048446
chr10	30181461	30182233
chr10	31019752	31021039
chr10	32535884	32536878
chr10	32612667	32613335
chr10	33926881	33927846
chr10	34137671	34138358
chr10	34741153	34742229
chr10	36204203	36205430
chr10	36858496	36859723
chr10	36860131	36861378
chr10	36983236	36984027
chr10	37208663	37209498
chr10	38189318	38189829
chr10	38286716	38287631
chr10	38628829	38629749
chr10	38692563	38693556
chr10	39255783	39256867
chr10	39751884	39752633
chr10	39785210	39786193
chr10	39789082	39789661
chr10	39978133	39979024
chr10	40059199	40059816
chr10	40482050	40483074
chr10	40602725	40603746
chr10	40941966	40942848
chr10	42579534	42580511
chr10	42844203	42844880
chr10	42940605	42941853
chr10	43010295	43011228
chr10	43297244	43298871
chr10	43299248	43299958
chr10	43343784	43344840
chr10	43414109	43415114
chr10	43442365	43443817
chr10	44581892	44582820
chr10	44859570	44861260
chr10	45178916	45179929
chr10	45201547	45202205
chr10	45533498	45534503
chr10	45613411	45614375
chr10	45735658	45736646
chr10	46013343	46013994
chr10	46905872	46906668
chr10	47904929	47905836
chr10	48079803	48080725
chr10	49199538	49200612
chr10	49315440	49316463
chr10	49823215	49824154
chr10	49848820	49849882
chr10	50482823	50483997
chr10	51654361	51654984
chr10	52136892	52138112
chr10	52247251	52250366
chr10	52363173	52363986
chr10	52698788	52699316
chr10	53148906	53149739
chr10	53790499	53791251
chr10	53800048	53800702
chr10	54645996	54646850
chr10	55926419	55927542
chr10	56096619	56097639
chr10	56112812	56113945
chr10	56261198	56262039
chr10	56348947	56350026
chr10	56362630	56364035
chr10	56413430	56414347
chr10	56612520	56613571
chr10	56759640	56760801
chr10	56815396	56816348
chr10	56849779	56851034
chr10	57826659	57827378
chr10	58054886	58055384
chr10	58063890	58064730
chr10	58973899	58974737
chr10	59028399	59029567
chr10	59100033	59101155
chr10	59324574	59325442
chr10	59341907	59343111
chr10	59414386	59415142
chr10	59428210	59429250
chr10	59436779	59437384
chr10	59490102	59490781
chr10	59908064	59908868
chr10	61888033	61888904
chr10	61911972	61913147
chr10	62113561	62114734
chr10	62163576	62164632
chr10	62254770	62255711
chr10	63816232	63817152
chr10	63839170	63839848
chr10	64452209	64452872
chr10	66415373	66416466
chr10	66428987	66429868
chr10	66465700	66466716
chr10	66466888	66468217
chr10	66518751	66519774
chr10	66653762	66655127
chr10	67575575	67576560
chr10	67588338	67589671
chr10	67615324	67616050
chr10	67629060	67629995
chr10	67652782	67654985
chr10	67655565	67656460
chr10	67700853	67701859
chr10	67738503	67739451
chr10	67817371	67818525
chr10	67897675	67898583
chr10	67903158	67904197
chr10	68005453	68006321
chr10	68052290	68053269
chr10	68086439	68087360
chr10	68398298	68399274
chr10	68783502	68784671
chr10	69557755	69558431
chr10	69684671	69685523
chr10	71266878	71267777
chr10	71759453	71760455
chr10	72117200	72118409
chr10	72330485	72331370
chr10	72881604	72882248
chr10	73468149	73469401
chr10	74260917	74261757
chr10	75223196	75223964
chr10	75299737	75300772
chr10	77069150	77069757
chr10	77828683	77829793
chr10	77874894	77876060
chr10	79144195	79144972
chr10	79389466	79390070
chr10	79458781	79460264
chr10	79502012	79502974
chr10	79603894	79604785
chr10	79630044	79631310
chr10	79711616	79712644
chr10	79896305	79897321
chr10	80023771	80024824
chr10	80084318	80085593
chr10	80479152	80479712
chr10	80499482	80500677
chr10	80559716	80560738
chr10	80599592	80600600
chr10	80630340	80631107
chr10	80748203	80749136
chr10	80783357	80784372
chr10	81033209	81035572
chr10	81059075	81060002
chr10	81063349	81064340
chr10	82184746	82185714
chr10	82276713	82277681
chr10	82504934	82506090
chr10	83416810	83417818
chr10	83635325	83636295
chr10	83959903	83961030
chr10	84379602	84380381
chr10	84603993	84604725
chr10	85379447	85380376
chr10	85494609	85495654
chr10	85757774	85758810
chr10	85831903	85832901
chr10	85860444	85861366
chr10	85888006	85889225
chr10	87322776	87323993
chr10	87331172	87333066
chr10	87508563	87509551
chr10	87693965	87694580
chr10	88193394	88194376
chr10	88749246	88749933
chr10	89709669	89710395
chr10	90684914	90685865
chr10	91037935	91038864
chr10	91261991	91263145
chr10	91321130	91322526
chr10	92019315	92020230
chr10	92114023	92115520
chr10	92623055	92623685
chr10	93352132	93353050
chr10	93602888	93603859
chr10	93610169	93611016
chr10	93700179	93701151
chr10	93952001	93952646
chr10	94278967	94279669
chr10	94286745	94287480
chr10	94717422	94718401
chr10	94977020	94978091
chr10	95085198	95086121
chr10	95192089	95193181
chr10	95327853	95328502
chr10	95860312	95861305
chr10	96007711	96008713
chr10	96079127	96080078
chr10	96509913	96510904
chr10	96793410	96794421
chr10	96919710	96920555
chr10	97780814	97781858
chr10	98146649	98147518
chr10	98211243	98212582
chr10	98233037	98233893
chr10	98300976	98301782
chr10	98725174	98726381
chr10	98731216	98732523
chr10	98852986	98854046
chr10	98878505	98879429
chr10	99681339	99682268
chr10	99843029	99844259
chr10	99949660	99950564
chr10	100010654	100011333
chr10	100254543	100255800
chr10	103018677	103019711
chr10	103447016	103447853
chr10	103486303	103486952
chr10	103647930	103648930
chr10	103771523	103772569
chr10	103832821	103833661
chr10	104397975	104398979
chr10	104760562	104761458
chr10	104864461	104865151
chr10	105467405	105468312
chr10	106337406	106338360
chr10	106490606	106491913
chr10	108370621	108371531
chr10	110090110	110090840
chr10	110348322	110349137
chr10	110356475	110357637
chr10	110573234	110573945
chr10	110912030	110913154
chr10	110990475	110991412
chr10	111509096	111510178
chr10	112063813	112064438
chr10	112300347	112301476
chr10	112985866	112986758
chr10	113871441	113872161
chr10	114179745	114181034
chr10	114776283	114777001
chr10	114821497	114822407
chr10	114956848	114957925
chr10	115046687	115047480
chr10	115297050	115298048
chr10	115807586	115808770
chr10	116744619	116745729
chr10	117028232	117030207
chr10	117106472	117107659
chr10	117180715	117181682
chr10	117251968	117252967
chr10	119198465	119199631
chr10	119408528	119409350
chr10	119684221	119685017
chr10	119710965	119711924
chr10	119721121	119722493
chr10	119761839	119762495
chr10	119854934	119856487
chr10	120008478	120009225
chr10	120157019	120157859
chr10	120181756	120182761
chr10	120242798	120243759
chr10	120264193	120265177
chr10	120287181	120288935
chr10	120308987	120310183
chr10	120664894	120666245
chr10	120865879	120867193
chr10	121553118	121553869
chr10	121728267	121728897
chr10	122228971	122229793
chr10	122323164	122324750
chr10	122513159	122513868
chr10	122632108	122632959
chr10	123237236	123238212
chr10	123262320	123263169
chr10	123449207	123449889
chr10	124258656	124259433
chr10	124842079	124843086
chr10	125223529	125224556
chr10	125246604	125248336
chr10	125316866	125317819
chr10	125349151	125350386
chr10	125358652	125359585
chr10	125405720	125406833
chr10	125465223	125467166
chr10	125575590	125576563
chr10	125581569	125582511
chr10	126089035	126089947
chr10	126415353	126416228
chr10	126727218	126728167
chr10	126775732	126777381
chr10	127103589	127104588
chr10	127482445	127483051
chr10	127495470	127496519
chr10	127739831	127740782
chr10	127847947	127848771
chr10	127935719	127936658
chr10	128063062	128064198
chr10	128242217	128242917
chr10	128258193	128259243
chr10	128281820	128282526
chr10	128304150	128305151
chr10	128995571	128996562
chr10	129551124	129551846
chr10	129906951	129907961
chr11	3435100	3436157
chr11	3547119	3548108
chr11	3608527	3609373
chr11	3863353	3864285
chr11	3899383	3900046
chr11	4455009	4455890
chr11	5788459	5789328
chr11	5855244	5856199
chr11	6053802	6054751
chr11	6343738	6345034
chr11	7629464	7630173
chr11	8521081	8521988
chr11	8524208	8525212
chr11	8552575	8553576
chr11	8558569	8559813
chr11	8665161	8666117
chr11	8679201	8680529
chr11	10262941	10263600
chr11	14215100	14215808
chr11	16683711	16684625
chr11	17401048	17402130
chr11	18941285	18941977
chr11	19073802	19074427
chr11	19673517	19674574
chr11	19823813	19825286
chr11	20675749	20676940
chr11	20699903	20700852
chr11	21257768	21258499
chr11	21471346	21472346
chr11	22247707	22248921
chr11	23155474	23156463
chr11	23205706	23206710
chr11	23301412	23301953
chr11	23565558	23566748
chr11	23971707	23972944
chr11	23977676	23978800
chr11	24466387	24467259
chr11	24516504	24517442
chr11	24517899	24519061
chr11	24595956	24597260
chr11	24650118	24650832
chr11	24683250	24684186
chr11	24844432	24845124
chr11	24872069	24873143
chr11	24957369	24957984
chr11	24999665	25000690
chr11	25323130	25324235
chr11	25755097	25756251
chr11	26389685	26391316
chr11	26505883	26506741
chr11	26947496	26948141
chr11	27310691	27311835
chr11	28099042	28099729
chr11	28390862	28391748
chr11	28583512	28584852
chr11	28734897	28735862
chr11	28779846	28780595
chr11	28898769	28899733
chr11	29273217	29274121
chr11	29447364	29448535
chr11	31769775	31770571
chr11	32621077	32622195
chr11	32669205	32670620
chr11	32677926	32678913
chr11	32808332	32809403
chr11	32905067	32906182
chr11	33025433	33026381
chr11	33096414	33097455
chr11	35261245	35262254
chr11	35264361	35264879
chr11	36070426	36071503
chr11	36105775	36106412
chr11	36246190	36247158
chr11	36421234	36422212
chr11	36815996	36816705
chr11	37484683	37485175
chr11	37611563	37612981
chr11	37903633	37904938
chr11	37983787	37984586
chr11	38910868	38911643
chr11	39268689	39269463
chr11	40207254	40209621
chr11	40504031	40504924
chr11	40806800	40807880
chr11	40874984	40875482
chr11	42547763	42548377
chr11	42608632	42609120
chr11	44001853	44002446
chr11	44881753	44882746
chr11	44949914	44951057
chr11	44951490	44952953
chr11	44967411	44968312
chr11	45005354	45006229
chr11	45042771	45043405
chr11	45202109	45203717
chr11	45207580	45208832
chr11	45254243	45255411
chr11	45270015	45271401
chr11	45363086	45364904
chr11	45380681	45381634
chr11	45405830	45407167
chr11	45531405	45532256
chr11	45651674	45652677
chr11	45694317	45695838
chr11	46163008	46163960
chr11	48402284	48402943
chr11	48830725	48831395
chr11	49056812	49058426
chr11	50194589	50195245
chr11	50270586	50272071
chr11	50710691	50711574
chr11	51203160	51204381
chr11	51448861	51449896
chr11	51780750	51781627
chr11	51813609	51814557
chr11	52362348	52362936
chr11	52488357	52489468
chr11	53062811	53063859
chr11	53063874	53064925
chr11	53283212	53284411
chr11	53441312	53442054
chr11	53939772	53941296
chr11	54242468	54243412
chr11	54335845	54336759
chr11	57413260	57414201
chr11	57640554	57641768
chr11	57699150	57700234
chr11	59177217	59178486
chr11	59318632	59320279
chr11	59953083	59953955
chr11	60350815	60351996
chr11	61044666	61045541
chr11	62284399	62284996
chr11	62364342	62365428
chr11	62660294	62660881
chr11	62734514	62735281
chr11	62936152	62936824
chr11	63140123	63141034
chr11	63345846	63346738
chr11	63643071	63644284
chr11	63663327	63664342
chr11	64081451	64082347
chr11	64251274	64252269
chr11	64294503	64295655
chr11	64433868	64434532
chr11	64514356	64515086
chr11	64614069	64615103
chr11	64712284	64713802
chr11	64782287	64783018
chr11	65314205	65315180
chr11	65410531	65411482
chr11	67230789	67231544
chr11	68451195	68452569
chr11	68651756	68652550
chr11	68714570	68715698
chr11	68829115	68830084
chr11	68886754	68887510
chr11	68907937	68908829
chr11	68936580	68937501
chr11	69179792	69180916
chr11	69230626	69232202
chr11	69359904	69360820
chr11	69373255	69374211
chr11	69392442	69393810
chr11	69406903	69407581
chr11	69445721	69446589
chr11	69475680	69476647
chr11	69714385	69715447
chr11	69734456	69735862
chr11	69883121	69884188
chr11	70338512	70339261
chr11	72420123	72421098
chr11	72990282	72991074
chr11	74643361	74644333
chr11	74860326	74861181
chr11	74960444	74961818
chr11	76151574	76152540
chr11	76171981	76173047
chr11	76219973	76220987
chr11	76243379	76244128
chr11	76576469	76577449
chr11	77149868	77150657
chr11	77420972	77421670
chr11	77777091	77777762
chr11	77907599	77908484
chr11	77976924	77977813
chr11	78001704	78002906
chr11	78349438	78350543
chr11	78470221	78471140
chr11	78510794	78511704
chr11	79092981	79094062
chr11	79806048	79806935
chr11	80017993	80018611
chr11	81345024	81345814
chr11	82577377	82578340
chr11	82648396	82649516
chr11	83084696	83085708
chr11	83285745	83286865
chr11	84729366	84730276
chr11	85195373	85196412
chr11	85305372	85306616
chr11	85444958	85446962
chr11	85526239	85527497
chr11	85841413	85842414
chr11	85931149	85932154
chr11	86171333	86172284
chr11	86570580	86571984
chr11	86782375	86783477
chr11	86806722	86807396
chr11	86922356	86923314
chr11	87235987	87237141
chr11	87239764	87241435
chr11	87256364	87257574
chr11	87261749	87263115
chr11	87275374	87276517
chr11	87284472	87285521
chr11	87860305	87861650
chr11	88268266	88269310
chr11	88369131	88370152
chr11	88631234	88632501
chr11	88801788	88802677
chr11	89281969	89283986
chr11	89369151	89369765
chr11	89962838	89963792
chr11	91655118	91655852
chr11	93430188	93430920
chr11	93516742	93517906
chr11	93679426	93680336
chr11	93828887	93830269
chr11	94107269	94108288
chr11	94850604	94851596
chr11	95245347	95246602
chr11	95275898	95276731
chr11	95315271	95316241
chr11	95440469	95441351
chr11	95960958	95962033
chr11	96902138	96903280
chr11	97007705	97008684
chr11	97049029	97049833
chr11	97176541	97178139
chr11	97341189	97342199
chr11	97745086	97746217
chr11	98543395	98544444
chr11	98656006	98656726
chr11	98932854	98933917
chr11	98957043	98958447
chr11	100800232	100801621
chr11	101267477	101268418
chr11	101488246	101489508
chr11	101502499	101503973
chr11	101506278	101507673
chr11	101519198	101520590
chr11	101755451	101756551
chr11	101949460	101951043
chr11	102416427	102418049
chr11	102464724	102466061
chr11	102469061	102470126
chr11	102485384	102486161
chr11	102993766	102994821
chr11	103558652	103559717
chr11	104389222	104390122
chr11	104411027	104412281
chr11	104783142	104783964
chr11	105181032	105181679
chr11	105655777	105656708
chr11	105944838	105946025
chr11	106077322	106078280
chr11	106133699	106134710
chr11	106647749	106648853
chr11	106649552	106650803
chr11	106893757	106894211
chr11	107331858	107333230
chr11	107340338	107341078
chr11	107831152	107832151
chr11	108070414	108071123
chr11	108120315	108121315
chr11	108781103	108782674
chr11	108808316	108809257
chr11	108943173	108944051
chr11	109130820	109132182
chr11	109286704	109287566
chr11	109576122	109577175
chr11	109763902	109764886
chr11	109856527	109857621
chr11	110519620	110520377
chr11	110531898	110532789
chr11	110662892	110663982
chr11	111403131	111404243
chr11	111423499	111425301
chr11	111547047	111548196
chr11	111666407	111667155
chr11	111689470	111690477
chr11	111743216	111744179
chr11	111822160	111824086
chr11	112036099	112037220
chr11	112086053	112087088
chr11	112180811	112181684
chr11	112273531	112274450
chr11	112384622	112385557
chr11	112416452	112417070
chr11	112510048	112510872
chr11	112874987	112876361
chr11	112984927	112985391
chr11	113010333	113011239
chr11	113545019	113545934
chr11	113611176	113612306
chr11	113646716	113647669
chr11	113851929	113852893
chr11	115424756	115426012
chr11	115794427	115795389
chr11	115978407	115979112
chr11	116030531	116031383
chr11	116189660	116190226
chr11	119464117	119464725
chr11	119599815	119600399
chr11	120092394	120093544
chr11	120102008	120103163
chr11	120205296	120207248
chr11	120210829	120212155
chr11	121459845	121461083
chr11	121567560	121568508
chr11	121796715	121797794
chr12	4233528	4234470
chr12	4898882	4899409
chr12	5591921	5592840
chr12	6581360	6582354
chr12	7617988	7618954
chr12	8853342	8854867
chr12	9003228	9004150
chr12	9036167	9037277
chr12	9265115	9265939
chr12	9267893	9269243
chr12	9286448	9287769
chr12	9323807	9324415
chr12	9344195	9345294
chr12	9347130	9348283
chr12	9375032	9376106
chr12	9389044	9389977
chr12	9411298	9412220
chr12	9444353	9445386
chr12	9485620	9486696
chr12	9757166	9759289
chr12	10578443	10579599
chr12	12333824	12335551
chr12	12407601	12409042
chr12	12587786	12588685
chr12	12947651	12949645
chr12	13050343	13051253
chr12	13056272	13057115
chr12	13180509	13181609
chr12	13188416	13189353
chr12	13191122	13192357
chr12	13221379	13222359
chr12	13466857	13467783
chr12	13706407	13707559
chr12	15512329	15513364
chr12	15822630	15823523
chr12	16760255	16760891
chr12	17147943	17148780
chr12	21378852	21380042
chr12	25260790	25261524
chr12	25777002	25778984
chr12	25779030	25780350
chr12	25782545	25784083
chr12	25785041	25786385
chr12	26218207	26219230
chr12	26256482	26257424
chr12	26662995	26664021
chr12	27173396	27174431
chr12	27178666	27179904
chr12	27217791	27218453
chr12	27495111	27496305
chr12	27500341	27501321
chr12	27760786	27761691
chr12	27820495	27821517
chr12	27840914	27841794
chr12	27871875	27874072
chr12	27938800	27939910
chr12	28027163	28028320
chr12	28150266	28151414
chr12	28210014	28210941
chr12	28248331	28249386
chr12	28753787	28754933
chr12	28940052	28940992
chr12	29484454	29485561
chr12	29808344	29809629
chr12	29942964	29943712
chr12	31870137	31870836
chr12	32035933	32036841
chr12	33064323	33065131
chr12	33504106	33505080
chr12	34347869	34348723
chr12	34488945	34490376
chr12	34536007	34537201
chr12	34606459	34607406
chr12	34641931	34642658
chr12	34647397	34648433
chr12	34648569	34649484
chr12	34785222	34785874
chr12	34884723	34885869
chr12	34900263	34901397
chr12	34904992	34905985
chr12	34931982	34932908
chr12	35091689	35092673
chr12	35266269	35266883
chr12	35278409	35280418
chr12	35288745	35289913
chr12	35367791	35369073
chr12	35476599	35477674
chr12	36069253	36069941
chr12	36884153	36884692
chr12	37447492	37448648
chr12	37466953	37467847
chr12	37510297	37511485
chr12	37519896	37521763
chr12	37522527	37523347
chr12	37810125	37811517
chr12	37850333	37851336
chr12	37991237	37992335
chr12	38121385	38122252
chr12	38153247	38154243
chr12	38541160	38542252
chr12	38729718	38730721
chr12	39503372	39504708
chr12	39552042	39552860
chr12	39570083	39571096
chr12	39799661	39800858
chr12	40018629	40019288
chr12	40413597	40414572
chr12	40673146	40674070
chr12	41436139	41436890
chr12	42086935	42088006
chr12	42128207	42128716
chr12	45369324	45370406
chr12	47236979	47238006
chr12	48529792	48530610
chr12	49692244	49693007
chr12	50025149	50026225
chr12	50581415	50582544
chr12	50832998	50834047
chr12	51599382	51600246
chr12	51706059	51706664
chr12	51908265	51909596
chr12	52361952	52362862
chr12	52448404	52449683
chr12	52792654	52793846
chr12	53367914	53368647
chr12	53688421	53689360
chr12	54058599	54059351
chr12	54161960	54163054
chr12	54594252	54595062
chr12	54724380	54725614
chr12	54764660	54765766
chr12	54947090	54947844
chr12	54952574	54953417
chr12	54960980	54961588
chr12	55654427	55655341
chr12	55797254	55798476
chr12	55810687	55812145
chr12	55814711	55816085
chr12	55819579	55820658
chr12	55830137	55831273
chr12	55834802	55836207
chr12	55838832	55840257
chr12	56593147	56593882
chr12	57783465	57784394
chr12	58006164	58007529
chr12	58052483	58053660
chr12	58189831	58190450
chr12	58567386	58568054
chr12	59369945	59370998
chr12	59830339	59830937
chr12	60230288	60231223
chr12	60231739	60232746
chr12	60290094	60291288
chr12	61454147	61454689
chr12	65047248	65048365
chr12	66176287	66177152
chr12	66481109	66481775
chr12	67338453	67338976
chr12	68224573	68225443
chr12	68869455	68870350
chr12	69275779	69276523
chr12	69639704	69640443
chr12	69898097	69898907
chr12	70259802	70261296
chr12	70328473	70329663
chr12	70461856	70462949
chr12	70532720	70533808
chr12	70575874	70576691
chr12	70582295	70583499
chr12	70993755	70995072
chr12	71450050	71451067
chr12	71927514	71928528
chr12	71950494	71951544
chr12	72237316	72238703
chr12	72559393	72560639
chr12	72888274	72889089
chr12	73186445	73187394
chr12	73562461	73563164
chr12	74003174	74004111
chr12	74076833	74077550
chr12	74224187	74225097
chr12	74332889	74334098
chr12	74433654	74434508
chr12	74468397	74469379
chr12	74601591	74602442
chr12	74612351	74613280
chr12	74617973	74619066
chr12	74622164	74623784
chr12	74719033	74719879
chr12	75002061	75002914
chr12	75008332	75009470
chr12	75028509	75029318
chr12	75880493	75881354
chr12	76697116	76698256
chr12	78786099	78786874
chr12	78953425	78954045
chr12	79090472	79091477
chr12	79451388	79452458
chr12	79849213	79850444
chr12	80055312	80055821
chr12	80513789	80514626
chr12	80607772	80608928
chr12	80775585	80777238
chr12	80808360	80809319
chr12	80830606	80831877
chr12	80947269	80948415
chr12	80987208	80988148
chr12	81029835	81030844
chr12	81121889	81122616
chr12	81213135	81214889
chr12	81215483	81216604
chr12	81466879	81468446
chr12	82223479	82224159
chr12	82695515	82696560
chr12	83351454	83352283
chr12	83763339	83764036
chr12	83949012	83949829
chr12	84789845	84791007
chr12	84828233	84828977
chr12	84972557	84973494
chr12	85291185	85291877
chr12	85864472	85865757
chr12	86181938	86183299
chr12	86255760	86256424
chr12	86336756	86337490
chr12	86795816	86797069
chr12	86814371	86815378
chr12	86826464	86828373
chr12	87341189	87342605
chr12	87582265	87583290
chr12	87983825	87984752
chr12	88148053	88148987
chr12	88164638	88165958
chr12	88225394	88226800
chr12	88234180	88235048
chr12	88235079	88236441
chr12	88287588	88288526
chr12	88487800	88489020
chr12	89384982	89385932
chr12	91646874	91647913
chr12	92451850	92452676
chr12	92826591	92827429
chr12	92933395	92934061
chr12	94214638	94215938
chr12	94387967	94388853
chr12	94580716	94582134
chr12	94610785	94611517
chr12	94915473	94916598
chr12	95051483	95052366
chr12	95754508	95755397
chr12	95798825	95799918
chr12	95812677	95813685
chr12	96512032	96513142
chr12	96704511	96705736
chr12	96906152	96907160
chr12	97233294	97234280
chr12	97503977	97504955
chr12	98441390	98442659
chr12	99089676	99090325
chr12	99972419	99973391
chr12	100629964	100630856
chr12	100727124	100727825
chr12	100733014	100733963
chr12	100767946	100768727
chr12	101347325	101348426
chr12	101424611	101426265
chr12	101439736	101440473
chr12	102321388	102322347
chr12	103056634	103057709
chr12	104116676	104117716
chr12	104282246	104283268
chr12	104499780	104500727
chr12	105831103	105832418
chr12	105917574	105918730
chr12	105990238	105990886
chr12	106007256	106008080
chr12	106046684	106047507
chr12	106139108	106140272
chr12	106176990	106178388
chr12	107239028	107240192
chr12	107505652	107506574
chr12	107914458	107915461
chr12	108118339	108119151
chr12	108159584	108160526
chr12	109190180	109191208
chr12	109199038	109200042
chr12	109417463	109418420
chr12	109418599	109419787
chr12	109880130	109880872
chr12	111933643	111934979
chr12	112441891	112442619
chr12	112775729	112776673
chr12	112915480	112916330
chr12	112951187	112951970
chr12	113144579	113145237
chr12	113204786	113205687
chr12	113502998	113504099
chr12	117564421	117565116
chr12	118724626	118725693
chr12	118906522	118908061
chr12	119357602	119358691
chr12	119540245	119541194
chr12	119897587	119898872
chr12	119932883	119933569
chr12	120430383	120431013
chr13	3596612	3597651
chr13	3668888	3669450
chr13	3707707	3709256
chr13	3902637	3903537
chr13	4107569	4108112
chr13	4373027	4373825
chr13	4970447	4971384
chr13	5210878	5211526
chr13	6835939	6836578
chr13	7993103	7994091
chr13	8049789	8050943
chr13	8483651	8484353
chr13	8566368	8567690
chr13	10007519	10008164
chr13	12879721	12883737
chr13	12978371	12980615
chr13	13012419	13013825
chr13	13172691	13173970
chr13	13207837	13208891
chr13	13608849	13609534
chr13	14157732	14158924
chr13	14193768	14194549
chr13	14927308	14929057
chr13	14965215	14965892
chr13	15094434	15095243
chr13	15144736	15146373
chr13	15304370	15305794
chr13	15446341	15447024
chr13	15537984	15538631
chr13	15559604	15560498
chr13	15635361	15636941
chr13	15742698	15743684
chr13	15790048	15791512
chr13	15833384	15834102
chr13	15958952	15959864
chr13	16294635	16295680
chr13	16943556	16944629
chr13	16958303	16959153
chr13	17438287	17439372
chr13	18967696	18968541
chr13	19019878	19020742
chr13	20258387	20259339
chr13	20606387	20607158
chr13	21250718	21251339
chr13	21697927	21699046
chr13	21808460	21809700
chr13	21813770	21814942
chr13	21841951	21842919
chr13	21901385	21902784
chr13	21925088	21925988
chr13	22026910	22027604
chr13	22127031	22128260
chr13	22132835	22133635
chr13	22134449	22135915
chr13	23460408	23461582
chr13	23622438	23623805
chr13	23666107	23667150
chr13	23775389	23776948
chr13	23789943	23790801
chr13	23830269	23831810
chr13	23842707	23843643
chr13	23853737	23854575
chr13	24515826	24516747
chr13	24805486	24806435
chr13	24892302	24893592
chr13	25103543	25104797
chr13	25192045	25193040
chr13	25278560	25279730
chr13	25717376	25718083
chr13	25721173	25722022
chr13	25739542	25740584
chr13	25846176	25847122
chr13	25921118	25921906
chr13	26171999	26172894
chr13	26182365	26183306
chr13	26446455	26447552
chr13	26746080	26747099
chr13	26986074	26986973
chr13	27122561	27124199
chr13	27297506	27298307
chr13	27647979	27648608
chr13	27809329	27810168
chr13	27818067	27819188
chr13	28500340	28501463
chr13	28509280	28510415
chr13	28781843	28783317
chr13	28819916	28820826
chr13	29045141	29046268
chr13	29049393	29050739
chr13	29551752	29552702
chr13	29695249	29696289
chr13	30077507	30078653
chr13	30326706	30327601
chr13	31022907	31024019
chr13	31138805	31139792
chr13	31295576	31296564
chr13	31695644	31696362
chr13	31945126	31946154
chr13	32062235	32063304
chr13	32084855	32085883
chr13	32100727	32101470
chr13	32128213	32129660
chr13	32131619	32132774
chr13	32520175	32521106
chr13	32531492	32532902
chr13	32573305	32574657
chr13	32796792	32797671
chr13	34391753	34392784
chr13	34479876	34480592
chr13	35398676	35399449
chr13	35794338	35795364
chr13	36208687	36210081
chr13	36438357	36438925
chr13	36834858	36835628
chr13	37152506	37153410
chr13	38128679	38129396
chr13	39107271	39108327
chr13	39165619	39166834
chr13	40043040	40043638
chr13	40073729	40075354
chr13	40200088	40200913
chr13	40352098	40353050
chr13	40512872	40513903
chr13	40527367	40528004
chr13	40795774	40796503
chr13	41466586	41467589
chr13	41700411	41701227
chr13	41709118	41709996
chr13	42146419	42147153
chr13	42337453	42337942
chr13	42626175	42627313
chr13	43460464	43461346
chr13	43887164	43888031
chr13	43913343	43914644
chr13	43959701	43960699
chr13	44053740	44054884
chr13	44193919	44194825
chr13	44209603	44210585
chr13	44481692	44482779
chr13	44495264	44495795
chr13	44546291	44546983
chr13	44590110	44591587
chr13	44595963	44596672
chr13	45164888	45165827
chr13	45535413	45536412
chr13	46045274	46046194
chr13	47873675	47874758
chr13	48035586	48036290
chr13	48755119	48756185
chr13	48878085	48878928
chr13	49082555	49083143
chr13	49747541	49748774
chr13	49969466	49970354
chr13	51086799	51088006
chr13	51316417	51317421
chr13	51353023	51353894
chr13	51354105	51355286
chr13	51374739	51376411
chr13	51409487	51410555
chr13	51746650	51747605
chr13	52068252	52069376
chr13	52860974	52861671
chr13	53070898	53072063
chr13	53277895	53278987
chr13	53348228	53349409
chr13	53353624	53354813
chr13	53404575	53405760
chr13	53558833	53559820
chr13	53560220	53561050
chr13	53793198	53794011
chr13	55637508	55638351
chr13	55694090	55694860
chr13	55735896	55736767
chr13	55755959	55756553
chr13	55895178	55896157
chr13	56240172	56241285
chr13	56390378	56391490
chr13	56422872	56423782
chr13	56452181	56453165
chr13	56624697	56625605
chr13	56683103	56683957
chr13	56708063	56709147
chr13	56802367	56803495
chr13	56983326	56983769
chr13	57830340	57830935
chr13	58159216	58160189
chr13	58316615	58317544
chr13	59488111	59489007
chr13	59893176	59893953
chr13	60097222	60098154
chr13	60108708	60109647
chr13	60109817	60111131
chr13	60116831	60117904
chr13	60120767	60121995
chr13	60158748	60159895
chr13	60211548	60212695
chr13	60278245	60280333
chr13	60327210	60328514
chr13	60368399	60369588
chr13	60409035	60409960
chr13	60439094	60440117
chr13	60466058	60467008
chr13	60510974	60512306
chr13	60535823	60536996
chr13	62804350	62805060
chr13	62966868	62967686
chr13	63042250	63043630
chr13	63044729	63045766
chr13	63094678	63095750
chr13	63146035	63146920
chr13	63195899	63197063
chr13	63241118	63242848
chr13	63257199	63258079
chr13	63272424	63273385
chr13	63340293	63341050
chr13	63346351	63347617
chr13	63390289	63391545
chr13	63397736	63398314
chr13	63406728	63407811
chr13	63433823	63434874
chr13	63532754	63533566
chr13	63665489	63666670
chr13	63667266	63668252
chr13	63668639	63669730
chr13	63728398	63729374
chr13	64019316	64020609
chr13	64071072	64072037
chr13	64086642	64087551
chr13	64254317	64255158
chr13	64667843	64668685
chr13	65220985	65221818
chr13	65750794	65751856
chr13	66222027	66223663
chr13	66329213	66330156
chr13	66577061	66578042
chr13	69594056	69594994
chr13	69749690	69751272
chr13	70421400	70422595
chr13	70631374	70632611
chr13	70912493	70913317
chr13	71243669	71244670
chr13	71585792	71587205
chr13	71590084	71591207
chr13	71594521	71595518
chr13	71636082	71636986
chr13	71686229	71687649
chr13	71702498	71703405
chr13	71871415	71872465
chr13	73254093	73255135
chr13	74024685	74025482
chr13	74328644	74329213
chr13	75786284	75786949
chr13	75790471	75791473
chr13	75855211	75856358
chr13	76956651	76957604
chr13	77149334	77150136
chr13	77462771	77463876
chr13	78029946	78031184
chr13	78585575	78586660
chr13	78663075	78663777
chr13	80882591	80883146
chr13	81022458	81022868
chr13	81453516	81454352
chr13	83113162	83113711
chr13	83178437	83179361
chr13	83413664	83414611
chr13	83445695	83447391
chr13	83742505	83743839
chr13	83803295	83804066
chr13	85026571	85027377
chr13	85225292	85226018
chr13	85458356	85459198
chr13	85666522	85667134
chr13	85696039	85696655
chr13	86103340	86104317
chr13	86271733	86272777
chr13	86604219	86604891
chr13	86779213	86779893
chr13	87092028	87093161
chr13	88596446	88597171
chr13	88942338	88943066
chr13	89333921	89335064
chr13	89807930	89808701
chr13	89835589	89836556
chr13	89838983	89840475
chr13	89847234	89848618
chr13	89865460	89867549
chr13	90088563	90089495
chr13	90433610	90434626
chr13	90447770	90448713
chr13	90546655	90547834
chr13	90599324	90599810
chr13	90628480	90629229
chr13	90812123	90813293
chr13	90813333	90814148
chr13	90818466	90819974
chr13	90901523	90902409
chr13	90975988	90976915
chr13	91062499	91062946
chr13	91326848	91327696
chr13	91362943	91364891
chr13	91510230	91511511
chr13	91513408	91514726
chr13	91599865	91600904
chr13	92964326	92965311
chr13	93285981	93286636
chr13	94233697	94234387
chr13	94608776	94609797
chr13	94899196	94900274
chr13	95377927	95378951
chr13	96076374	96077375
chr13	96095945	96096995
chr13	96931416	96932159
chr13	97644935	97645865
chr13	97985992	97986792
chr13	98256712	98258088
chr13	98370752	98371975
chr13	98550458	98551489
chr13	98554468	98556170
chr13	98709442	98710651
chr13	98710903	98711780
chr13	98947781	98948408
chr13	99032729	99033532
chr13	99303607	99304728
chr13	99660641	99661902
chr13	100307323	100308331
chr13	100310814	100311676
chr13	100573811	100574583
chr13	101420502	101421592
chr13	101662564	101663481
chr13	101712996	101713780
chr13	101985379	101986797
chr13	101988958	101989891
chr13	102082510	102083544
chr13	102197207	102198566
chr13	102414864	102415687
chr13	102736879	102737763
chr13	103077791	103078650
chr13	103103432	103104570
chr13	103817584	103818380
chr13	104104979	104105854
chr13	104557882	104558912
chr13	104619404	104620321
chr13	104659859	104660855
chr13	104664083	104665231
chr13	104813063	104814270
chr13	104968057	104969302
chr13	105165161	105165987
chr13	105284036	105284970
chr13	105366181	105367227
chr13	105606778	105607798
chr13	105985324	105986106
chr13	107024580	107025486
chr13	108276692	108277761
chr13	108343393	108344259
chr13	108455925	108456667
chr13	108585369	108586518
chr13	108838697	108839608
chr13	109179773	109180337
chr13	110225328	110226003
chr13	110230225	110231891
chr13	111365543	111366320
chr13	111549642	111550651
chr13	111558746	111559756
chr13	111685263	111686951
chr13	111697212	111698220
chr13	111845414	111846489
chr13	112088830	112089933
chr13	113394092	113394992
chr13	113717146	113718212
chr13	114207806	114209455
chr13	114408495	114409270
chr13	114583632	114584213
chr13	114584311	114585305
chr13	114650636	114651677
chr13	115403218	115404015
chr13	115426448	115427130
chr13	115834758	115835889
chr13	116001341	116002279
chr13	116204291	116205190
chr13	116532134	116533055
chr13	118115961	118116697
chr13	118511281	118512264
chr13	118658940	118659847
chr13	119613625	119614526
chr13	120032652	120033795
chr13	120197810	120198601
chr14	8680044	8680848
chr14	8684185	8684900
chr14	8712448	8713194
chr14	8721648	8722626
chr14	8728870	8730318
chr14	8734394	8735140
chr14	8769637	8770542
chr14	8839323	8840541
chr14	9210920	9211744
chr14	11727783	11728567
chr14	12053898	12054596
chr14	12858206	12859458
chr14	14116140	14117286
chr14	14844614	14845292
chr14	15894557	15895324
chr14	16209125	16209676
chr14	17124686	17125425
chr14	17128855	17129853
chr14	17160749	17161738
chr14	17197320	17198004
chr14	17386632	17388047
chr14	17407724	17408540
chr14	17706217	17706741
chr14	17786794	17787859
chr14	17789996	17791126
chr14	18240796	18241541
chr14	19070448	19071984
chr14	19103063	19104139
chr14	19340093	19340954
chr14	20805957	20807003
chr14	21166973	21167867
chr14	21622071	21623168
chr14	21970910	21971986
chr14	22058793	22059865
chr14	22070146	22071162
chr14	22071200	22072364
chr14	22088675	22089604
chr14	22104014	22104845
chr14	22106459	22108087
chr14	22281278	22282284
chr14	22318926	22320512
chr14	22493334	22494392
chr14	22498703	22499691
chr14	22538229	22539155
chr14	22770758	22771797
chr14	22806753	22807799
chr14	22934082	22934972
chr14	22937510	22938528
chr14	22985602	22987122
chr14	23100403	23101568
chr14	23254528	23255682
chr14	23260907	23261925
chr14	23364822	23365987
chr14	23428392	23429372
chr14	23430950	23431896
chr14	23834614	23835988
chr14	24176540	24177917
chr14	24209357	24210325
chr14	24261781	24262509
chr14	24457168	24458540
chr14	24523337	24524321
chr14	24531462	24532403
chr14	25081774	25082951
chr14	25305842	25306849
chr14	25384040	25384715
chr14	25660168	25660999
chr14	25673619	25674657
chr14	25719851	25720906
chr14	25804649	25806120
chr14	25842370	25843231
chr14	25861375	25862441
chr14	25863734	25865063
chr14	25945906	25946754
chr14	25960978	25962032
chr14	26005071	26005884
chr14	26087642	26088387
chr14	26137088	26138058
chr14	26169500	26170741
chr14	26276718	26277771
chr14	26278116	26279136
chr14	26937883	26938759
chr14	27077569	27078489
chr14	27459292	27459938
chr14	27880861	27882049
chr14	27883622	27884302
chr14	28095217	28096131
chr14	28116498	28117169
chr14	28164375	28165836
chr14	28179979	28180929
chr14	28270702	28271353
chr14	28371864	28372993
chr14	28409156	28410078
chr14	28601943	28603413
chr14	28621361	28622512
chr14	28705923	28707652
chr14	28713624	28714584
chr14	28790848	28791785
chr14	28882812	28883811
chr14	28910315	28911655
chr14	28978003	28979049
chr14	29065692	29066317
chr14	29162043	29162885
chr14	29163533	29164680
chr14	29178073	29178868
chr14	29319230	29321479
chr14	29476992	29477955
chr14	29563748	29564861
chr14	29588337	29589569
chr14	29600675	29601530
chr14	29626588	29627338
chr14	29785482	29786617
chr14	29802755	29803680
chr14	29886583	29887986
chr14	29890184	29891475
chr14	29923610	29924628
chr14	30154040	30155059
chr14	31190930	31191922
chr14	31467191	31467980
chr14	32474655	32475785
chr14	33359839	33360615
chr14	33844169	33845103
chr14	34664019	34664873
chr14	35221929	35222552
chr14	35537708	35538465
chr14	41220617	41221301
chr14	41907118	41908081
chr14	43946875	43947796
chr14	44048471	44049691
chr14	45504398	45505043
chr14	45930572	45931250
chr14	46058003	46058960
chr14	46445423	46446249
chr14	46639108	46640118
chr14	47278492	47279786
chr14	47337820	47338822
chr14	47441338	47442385
chr14	48248664	48249662
chr14	48738859	48740164
chr14	49065374	49066364
chr14	49685718	49686598
chr14	50271841	50273077
chr14	50681297	50682840
chr14	51522777	51523862
chr14	52008034	52009008
chr14	52034622	52035517
chr14	52691546	52692520
chr14	52814788	52815352
chr14	52863730	52864793
chr14	52898807	52899386
chr14	54947861	54949147
chr14	56441569	56442989
chr14	56471914	56473271
chr14	57312391	57313353
chr14	57577364	57577933
chr14	57688326	57689653
chr14	58142529	58143535
chr14	58693103	58694228
chr14	58877523	58878151
chr14	59225567	59226917
chr14	59256497	59257769
chr14	59484916	59486350
chr14	59606332	59607179
chr14	60385490	60386666
chr14	60414828	60415960
chr14	60427851	60429346
chr14	60446315	60447397
chr14	60537794	60538336
chr14	60549960	60551218
chr14	60869911	60870837
chr14	60883405	60884406
chr14	61287499	61288675
chr14	62454276	62455720
chr14	62541952	62542587
chr14	63379544	63380417
chr14	63394555	63395226
chr14	63714624	63715659
chr14	64239163	64240038
chr14	65059205	65060072
chr14	65962214	65963374
chr14	66424082	66424995
chr14	67014021	67014738
[truncated: 4,580 more rows]
